# Supplementary material for: The trypanocidal benzoxaborole AN7973 inhibits trypanosome mRNA processing
Source: PubMed Central journal article supplement (PMC6173450; doi:10.1371/journal.ppat.1007315), 2018-09-25

**A. Y structure / SLRNA**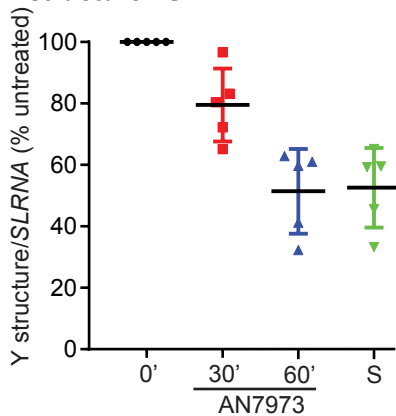**D. Diminazene aceturate (Berenil)**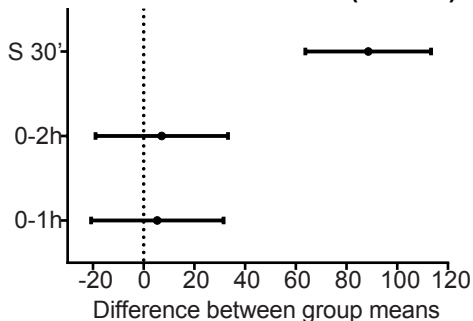**B. 95% Confidence intervals AN7973**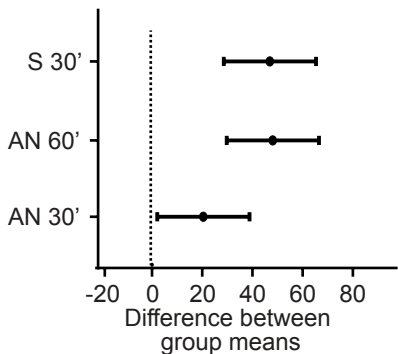**E. Pentamidine**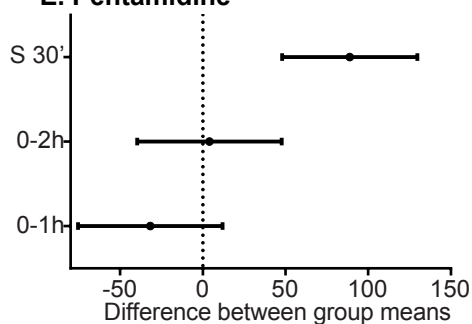**C. DFMO**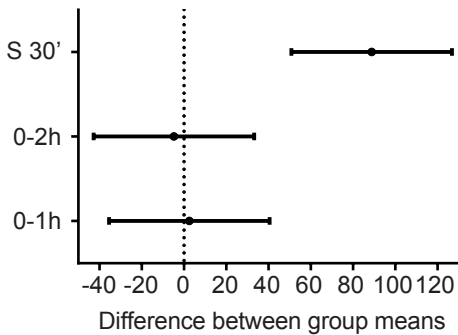**F. Suramin**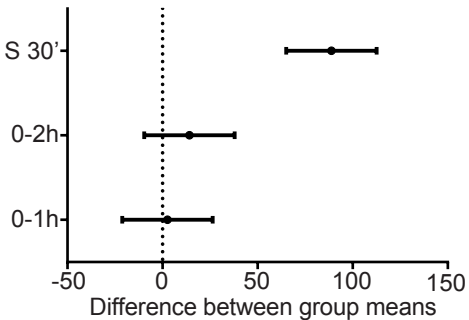

Supplement: ppat.1007315.s010.pdf [file ppat.1007315.s010.pdf]
