# Supplementary material for: The trypanocidal benzoxaborole AN7973 inhibits trypanosome mRNA processing
Source: PubMed Central journal article supplement (PMC6173450; doi:10.1371/journal.ppat.1007315), 2018-09-25

## A. Time course, experiment 2

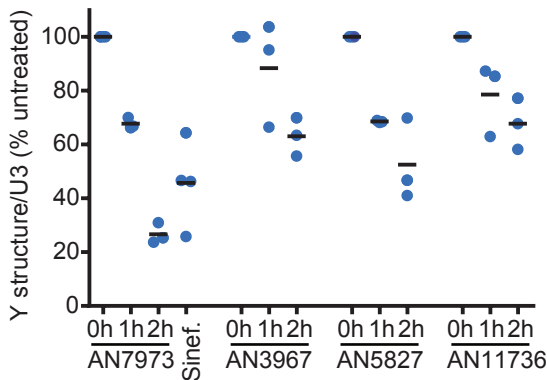

## B. Y structure levels procyclic

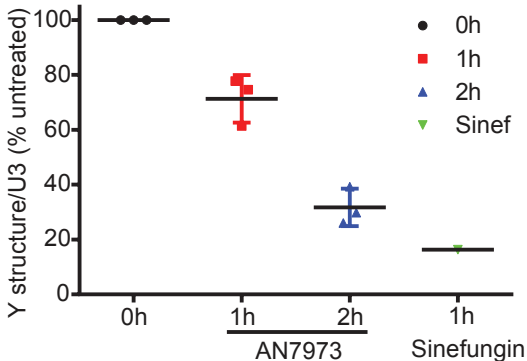

## C. 95% confidence Intervals

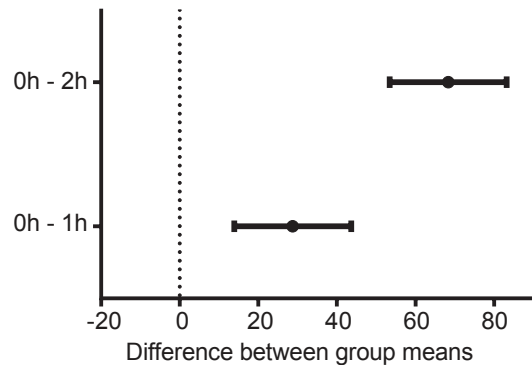

Supplement: ppat.1007315.s013.pdf [file ppat.1007315.s013.pdf]
