# Supplementary material for: The trypanocidal benzoxaborole AN7973 inhibits trypanosome mRNA processing
Source: PubMed Central journal article supplement (PMC6173450; doi:10.1371/journal.ppat.1007315), 2018-09-25
Supplement: ppat.1007315.s017.pdf [file ppat.1007315.s017.pdf]

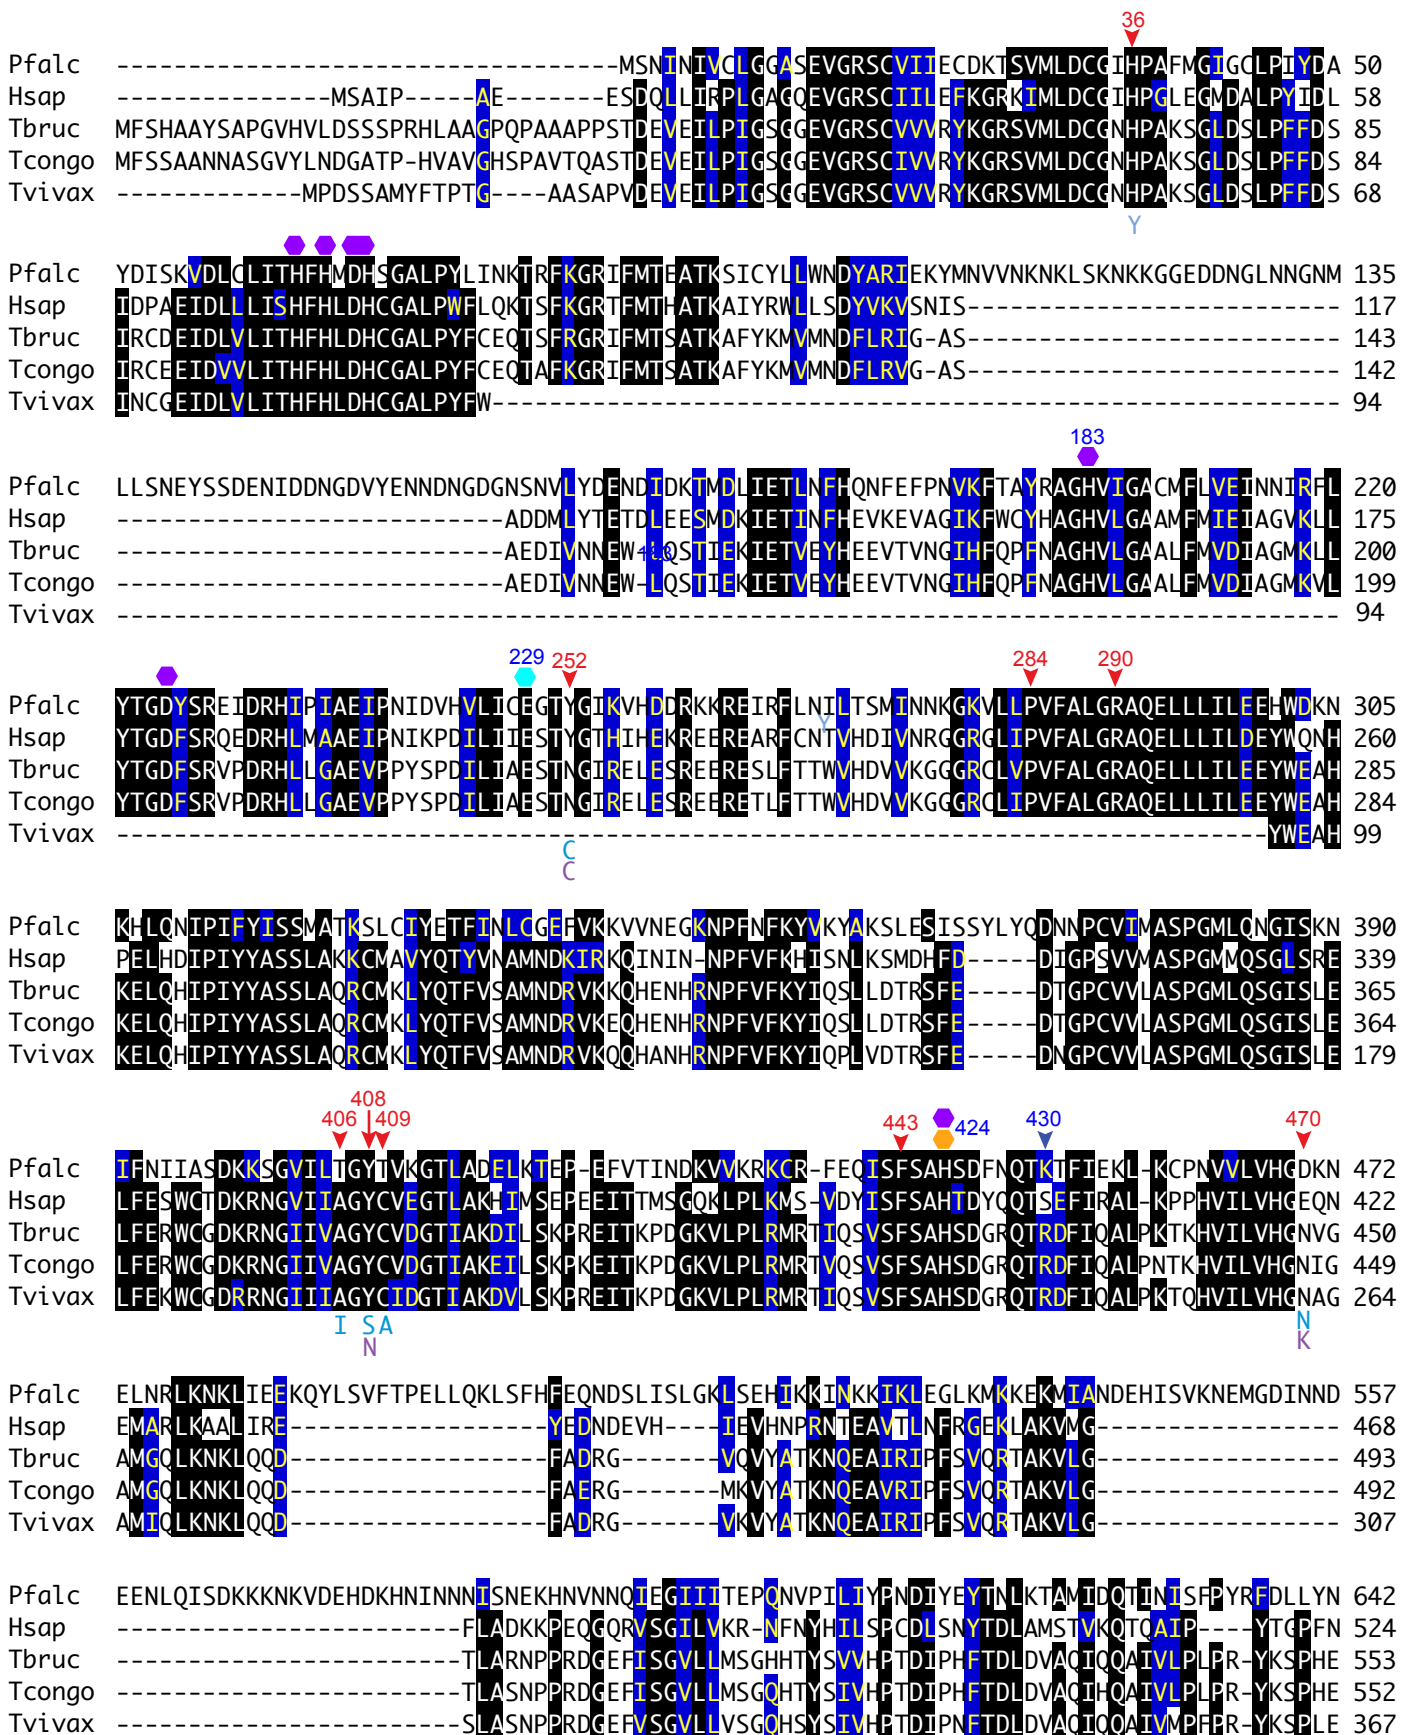

### KEY

- Conserved chemical group
- Identical
- Zinc binding
- Interaction with His 396 (human) = 424 *T. brucei*
- Interaction with phosphate
- Residue change linked to AN3661 resistance in *Toxoplasma*
- Residue change linked to AN3661 resistance in *Plasmodium*
- Residue number in the *Plasmodium falciparum* sequence / in *T. brucei* sequence

In a structural model, R290 and Y252 interact with the carboxylate of AN3661

Pfalc- *Plasmodium falciparum* Hsap- *Homo sapiens*

Tbruc- *Trypanosoma brucei* Tcongo- *Trypanosoma congolense* Tvivax- *Trypanosoma vivax*
