# Supplementary material for: The trypanocidal benzoxaborole AN7973 inhibits trypanosome mRNA processing
Source: PubMed Central journal article supplement (PMC6173450; doi:10.1371/journal.ppat.1007315), 2018-09-25

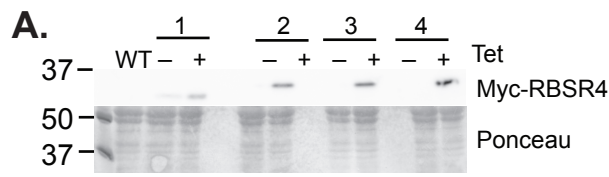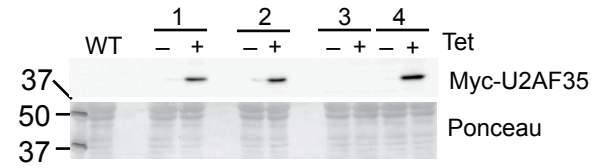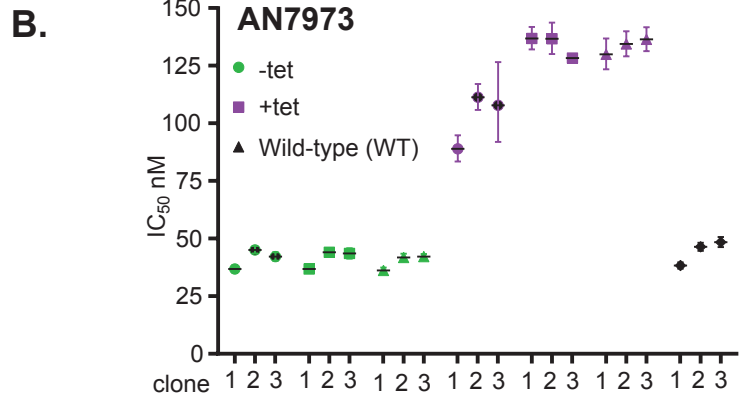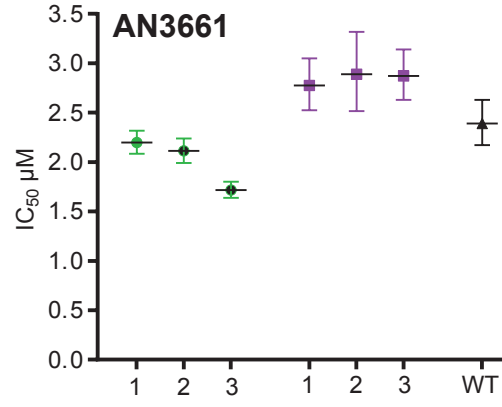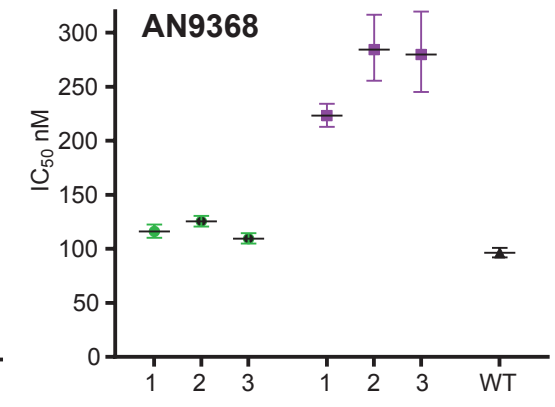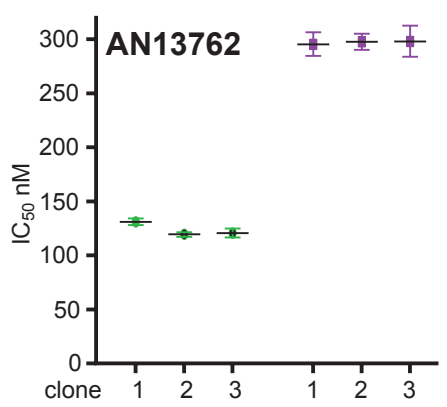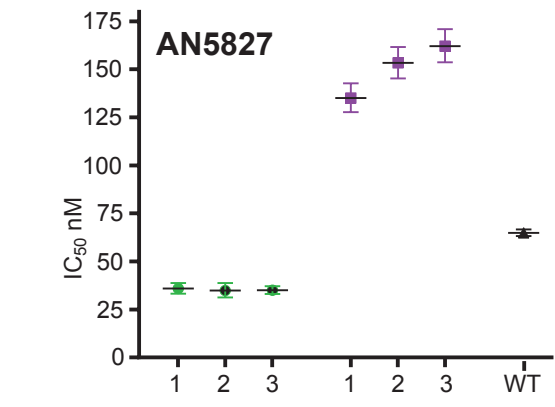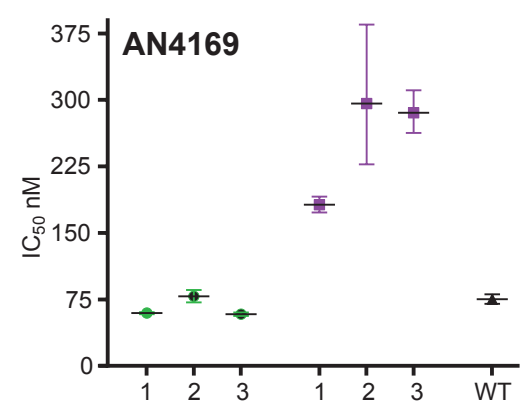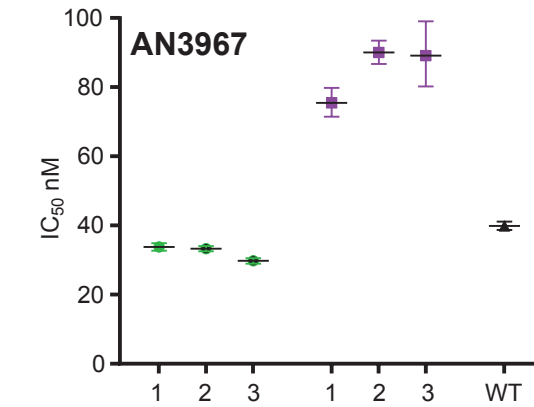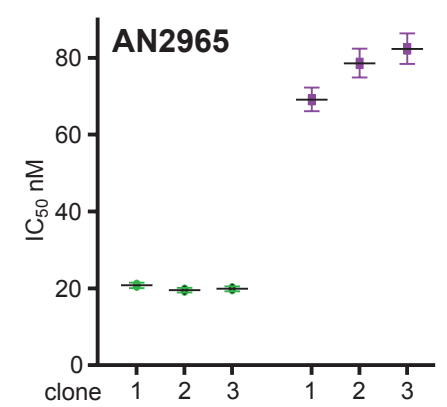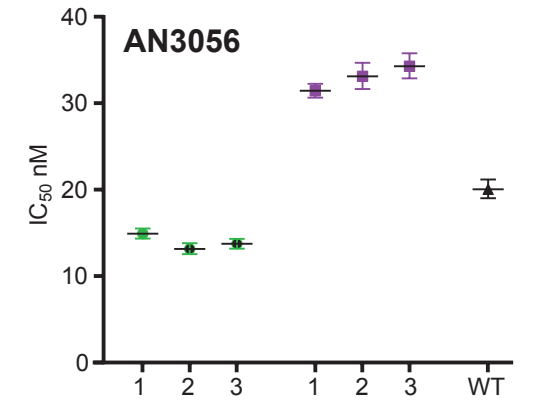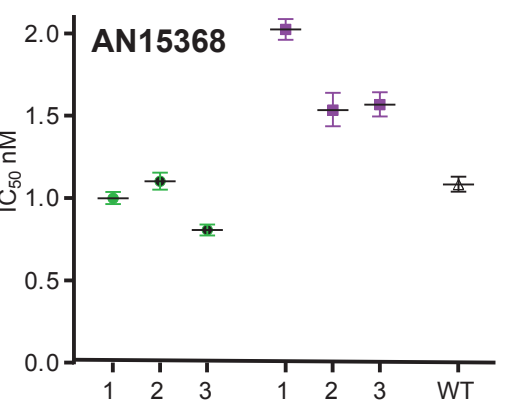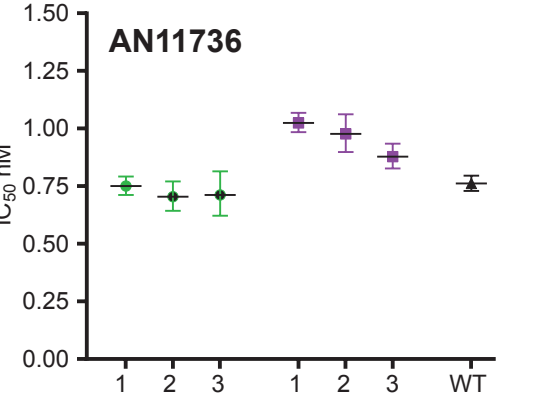

Supplement: ppat.1007315.s019.pdf [file ppat.1007315.s019.pdf]
