# Supplementary material for: The trypanocidal benzoxaborole AN7973 inhibits trypanosome mRNA processing
Source: PLoS Pathog. 2018 Sep 25;14(9):e1007315. doi: 10.1371/journal.ppat.1007315 (PMC6173450; doi:10.1371/journal.ppat.1007315)
Supplement: S2 Table — A description of the experiments is on sheet 1. (XLSX) [file ppat.1007315.s002.xlsx]

## Sheet: Legend
Description
One of the most direct strategies to identify the targets of antimicrobial drugs is selection of resistant mutants. We applied AN7973 selection to a library of T. brucei each of which over-expresses a different trypanosome protein or protein fragment [1]. When we grew this library in the presence of anti-trypanosome compounds with known targets, trypanosomes that ectopically expressed those targe…
To select more resistant parasites, we grew the two lines for four months in increasing amounts of AN7973, but the resulting cloned populations had EC50s of only 1.6x (75nM, clone 80C5 in the tables) and 2.1x (90 nM, clone 80D4 in the tables) relative to wild-type (45 nM). We subjected DNA from these clones, the clones from which they were derived (80C and 80D), and the original cells, to shotgun…
This Table summarizes the results in S2 and S3 Tables for the mildy (FB6_80C, FB6_80D) and more resistant (FB6_80C5, FB6_80D4) cell lines. Columns D-M are denoted with the cell line name, followed by whether a snp or indel was found. "#N/A" means none was found. In columns N-Q the Reads per Kilobase per MIllion reads (RPKM) in the indicated cell line is divided by the copy number in wild-type. Co…
FB6_80C5 is a shortened version of FB6_80C
References
[1] Erben E, Fadda A, Lueong S, Hoheisel J, Clayton C. Genome-wide discovery of post-transcriptional regulators in Trypanosoma brucei. PLoS Pathogens. 2014;10:e1004178. PubMed Central PMCID: PMCdoi:10.1371/journal.ppat.1004178.
[2] Begolo D, Erben E, Clayton C. Drug target identification using a trypanosome over-expression library. Antimicrobial agents and chemotherapy. 2014. Epub 2014/07/23. doi: 10.1128/aac.03338-14. PubMed PMID: 25049244.
[3] Jones DC, Foth BJ, Urbaniak MD, Patterson S, Ong HB, Berriman M, et al. Genomic and Proteomic Studies on the Mode of Action of Oxaboroles against the African Trypanosome. PLoS Negl Trop Dis. 2015;9(12):e0004299. Epub 2015/12/20. doi: 10.1371/journal.pntd.0004299. PubMed PMID: 26684831; PubMed Central PMCID: PMCPmc4689576.

## Sheet: snp indel cnv
GeneID	Annotation	Class	FB6_80C.snp	FB6_80C.indel	FB6_80D.snp	FB6_80D.indel	FB6_80C5.snp	FB6_80C5.indel	FB6_80D4.snp	FB6_80D4.indel	FB6_80CDC5D4	FB6_80CDC5D4	80C/WT copy no	80C5/WT copy no	80D/WT copy no	80D5/WT copy no	Increased copy number in any?	Decreased copy number in any?	Increased copy number in 80C3 and 80D2	snp in any
Tb927.11.16390	(CKS1 cyclin dependent kinases regulatory subunit, putative	Cell.cycle	#N/A	#N/A	#N/A	#N/A	#N/A	#N/A	#N/A	#N/A	#N/A	#N/A	0.9	1.7	1	1.5	1	0	1	0
Tb927.11.13900	Centrin5	Cell.cycle	#N/A	#N/A	#N/A	#N/A	#N/A	#N/A	#N/A	#N/A	#N/A	#N/A	1.1	1.5	1	1.5	1	0	1	0
Tb927.7.5790	protein disulfide isomerase, ERp44-like	Chaperone	#N/A	#N/A	#N/A	#N/A	#N/A	#N/A	#N/A	#N/A	#N/A	#N/A	1.1	1.8	1.1	1.5	1	0	1	0
Tb927.10.10600	ARP2/3 complex 16kDa subunit, putative	Cytoskeleton	#N/A	#N/A	#N/A	#N/A	#N/A	#N/A	#N/A	#N/A	#N/A	#N/A	0.9	4.6	1	2.8	1	0	1	0
Tb927.2.2900	ARP2/3 complex subunit, putative	Cytoskeleton	#N/A	#N/A	#N/A	#N/A	#N/A	#N/A	#N/A	#N/A	#N/A	#N/A	1.2	2.3	1.1	1.7	1	0	1	0
Tb927.11.7740	dynein light chain, putative,dynein Tctex2 family, putative	Cytoskeleton	#N/A	#N/A	#N/A	#N/A	#N/A	#N/A	#N/A	#N/A	#N/A	#N/A	0.7	3.4	1.5	1.8	1	0	1	0
Tb927.10.450	hypothetical protein, conserved, microtubule binding domains. very K/E rich	Cytoskeleton	#N/A	#N/A	#N/A	#N/A	#N/A	#N/A	#N/A	#N/A	#N/A	#N/A	1.2	4.4	1.3	1.8	1	0	1	0
Tb927.11.16150	tubulin binding cofactor A, putative	Cytoskeleton	#N/A	#N/A	#N/A	#N/A	#N/A	#N/A	#N/A	#N/A	#N/A	#N/A	0.9	2.2	0.9	1.8	1	0	1	0
Tb927.11.6090	tatD related deoxyribonuclease, putative	DNA	#N/A	#N/A	#N/A	#N/A	#N/A	#N/A	#N/A	#N/A	#N/A	#N/A	1.4	1.7	1.3	1.7	1	0	1	0
Tb927.6.3320	ferric reductase transmembrane protein, putative	Enzyme	#N/A	#N/A	#N/A	#N/A	#N/A	#N/A	#N/A	#N/A	#N/A	#N/A	1.1	1.5	1	1.6	1	0	1	0
Tb927.3.610	N-acetyltransferase complex ARD1 subunit, putative	Enzyme	#N/A	#N/A	#N/A	#N/A	#N/A	#N/A	#N/A	#N/A	#N/A	#N/A	1	1.5	1	1.5	1	0	1	0
Tb927.10.1690	nucleotide binding protein, putative (NBP 1)	Enzyme	#N/A	#N/A	#N/A	#N/A	#N/A	#N/A	#N/A	#N/A	#N/A	#N/A	1.2	1.7	1.2	1.6	1	0	1	0
Tb927.4.3290	ESAG2-like	ESAG	#N/A	#N/A	#N/A	#N/A	#N/A	#N/A	#N/A	#N/A	#N/A	#N/A	0.9	2.7	0.9	1.7	1	0	1	0
Tb927.11.14620	ESAG2, putative	ESAG	#N/A	#N/A	#N/A	#N/A	#N/A	#N/A	#N/A	#N/A	#N/A	#N/A	0.9	2	0.8	1.5	1	0	1	0
Tb927.11.7040	pterin-4-alpha-carbinolamine dehydratase, putative	Folate	#N/A	#N/A	#N/A	#N/A	#N/A	#N/A	#N/A	#N/A	#N/A	#N/A	0.9	1.9	0.9	1.5	1	0	1	0
Tb927.3.5660	GnT11 UDP-GlcNAc:α3-D-mannoside β1–2-N-acetylglucosaminyltransferase I	Glycans	#N/A	#N/A	#N/A	#N/A	#N/A	#N/A	#N/A	#N/A	#N/A	#N/A	0.9	2	0.9	1.5	1	0	1	0
Tb927.9.16190	UDP-Gal or UDP-GlcNAc-dependent glycosyltransferase, putative	Glycans	#N/A	#N/A	#N/A	#N/A	#N/A	#N/A	#N/A	#N/A	#N/A	#N/A	1.2	2.1	1.1	1.9	1	0	1	0
Tb927.9.800	UDP-Gal or UDP-GlcNAc-dependent glycosyltransferase, putative	Glycans	#N/A	#N/A	#N/A	#N/A	#N/A	#N/A	#N/A	#N/A	#N/A	#N/A	1.6	3.5	1.5	2.5	1	0	1	0
Tb927.4.5790	UDP-Gal or UDP-GlcNAc-dependent glycosyltransferase, putative	Glycans	#N/A	#N/A	missense_variant	#N/A	#N/A	#N/A	#N/A	#N/A	#N/A	#N/A	1.4	3.1	1.3	2	1	0	1	1
Tb927.11.1910	cation transporter protein, putative	Ions	#N/A	#N/A	#N/A	#N/A	#N/A	#N/A	#N/A	#N/A	#N/A	#N/A	0.9	1.5	1	1.5	1	0	1	0
Tb927.10.3980	Voltage-gated potassium channel domain. 3 TM domains	Ions	#N/A	frameshift_variant	#N/A	frameshift_variant	#N/A	frameshift_variant	#N/A	frameshift_variant	#N/A	#N/A	1.6	44.4	1.4	13.3	1	0	1	0
Tb927.9.1610	CDP-diacylglycerol--inositol 3-phosphatidyltransferase, putative	Lipids	#N/A	#N/A	#N/A	#N/A	#N/A	#N/A	#N/A	#N/A	#N/A	#N/A	0.9	1.5	1	1.5	1	0	1	0
Tb927.5.4530	Elongase 4	Lipids	#N/A	#N/A	#N/A	#N/A	#N/A	#N/A	#N/A	#N/A	#N/A	#N/A	1.5	1.6	0.9	1.7	1	0	1	0
Tb927.4.1220	leucine-rich repeat protein (LRRP)	LRRP	#N/A	#N/A	#N/A	#N/A	#N/A	#N/A	#N/A	#N/A	#N/A	#N/A	1	2.2	1	1.5	1	0	1	0
Tb927.6.5050	V-type ATPase, C subunit, putative	Lysosome	#N/A	#N/A	#N/A	#N/A	#N/A	#N/A	#N/A	#N/A	#N/A	#N/A	1.1	2	1	1.5	1	0	1	0
Tb927.9.7850	hypothetical protein, conserved, predicted GPI anchor	Membrane.protein	#N/A	#N/A	#N/A	#N/A	#N/A	#N/A	missense_variant	#N/A	#N/A	#N/A	1.3	1.9	1.4	2.9	1	0	1	1
Tb927.9.7900	hypothetical protein, conserved, predicted GPI anchor	Membrane.protein	missense_variant	#N/A	missense_variant	#N/A	missense_variant	#N/A	missense_variant	#N/A	missense_variant	#N/A	1.4	4.7	1.4	4	1	0	1	1
Tb927.9.7870	hypothetical protein, conserved, predicted GPI anchor	Membrane.protein	missense_variant	#N/A	missense_variant	#N/A	#N/A	#N/A	missense_variant	frameshift_variant	#N/A	#N/A	1.9	3.5	2.5	4.5	1	0	1	1
Tb927.9.7950	hypothetical protein, conserved, predicted GPI anchor	Membrane.protein	#N/A	#N/A	#N/A	#N/A	missense_variant	#N/A	#N/A	#N/A	#N/A	#N/A	1.1	2.9	1.1	1.7	1	0	1	1
Tb927.10.10250	EP2 procyclin	Membrane.protein	#N/A	#N/A	#N/A	#N/A	#N/A	#N/A	#N/A	#N/A	#N/A	#N/A	1.2	3.5	1.1	2	1	0	1	0
Tb927.6.510	GPEET2 procyclin	Membrane.protein	#N/A	#N/A	#N/A	#N/A	#N/A	#N/A	#N/A	#N/A	#N/A	#N/A	1.1	1.5	1.4	1.5	1	0	1	0
Tb927.11.5600	ATOM14 - POMP14	Mito.biogenesis	#N/A	#N/A	#N/A	#N/A	#N/A	#N/A	#N/A	#N/A	#N/A	#N/A	1.3	2.1	1	1.6	1	0	1	0
Tb927.7.5700	ATOM36	Mito.biogenesis	#N/A	#N/A	#N/A	#N/A	#N/A	#N/A	#N/A	#N/A	#N/A	#N/A	0.9	1.7	0.9	1.5	1	0	1	0
Tb927.7.2200	Tim9	Mito.biogenesis	#N/A	#N/A	#N/A	#N/A	#N/A	#N/A	#N/A	#N/A	#N/A	#N/A	1	2.3	0.9	1.6	1	0	1	0
Tb927.10.8890	kinetoplast DNA-associated protein, putative	Mito.DNA	#N/A	#N/A	#N/A	#N/A	#N/A	#N/A	#N/A	#N/A	#N/A	#N/A	1	4	1.1	2.2	1	0	1	0
Tb927.11.12040	component of cytochrome c oxidase complex	Mito.e.transport	#N/A	#N/A	#N/A	#N/A	#N/A	#N/A	#N/A	#N/A	#N/A	#N/A	0.9	2	0.8	2	1	0	1	0
Tb927.11.13650	cytochrome b5, putative (CYB5)	Mito.e.transport	#N/A	#N/A	#N/A	#N/A	#N/A	#N/A	#N/A	#N/A	#N/A	#N/A	0.9	1.7	0.9	1.8	1	0	1	0
Tb927.8.5120	cytochrome c	Mito.e.transport	#N/A	#N/A	#N/A	#N/A	#N/A	#N/A	#N/A	#N/A	#N/A	#N/A	0.9	2.9	0.9	1.9	1	0	1	0
Tb927.10.9620	NADH-ubiquinone oxidoreductase c	Mito.e.transport	#N/A	#N/A	#N/A	#N/A	#N/A	#N/A	#N/A	#N/A	#N/A	#N/A	1	10.7	1	3.5	1	0	1	0
Tb927.4.440	NADH-ubiquinone oxidoreductase complex I subunit, putative	Mito.e.transport	#N/A	#N/A	#N/A	#N/A	#N/A	#N/A	#N/A	#N/A	#N/A	#N/A	1	2.3	0.9	1.8	1	0	1	0
Tb927.4.4990	ubiquinol-cytochrome c reductase, putative	Mito.e.transport	#N/A	#N/A	#N/A	#N/A	#N/A	#N/A	#N/A	#N/A	#N/A	#N/A	0.9	2.2	1	1.8	1	0	1	0
Tb927.6.4180	POMP32	Mito.membrane	#N/A	#N/A	#N/A	#N/A	#N/A	#N/A	#N/A	#N/A	#N/A	#N/A	1	2.7	1.1	2	1	0	1	0
Tb927.10.2710	ferredoxin, putative	Mito.pathway	#N/A	#N/A	#N/A	#N/A	#N/A	#N/A	#N/A	#N/A	#N/A	#N/A	0.9	2.4	0.9	1.6	1	0	1	0
Tb927.6.2510	Flavinator of succinate dehydrogenase, putative	Mito.pathway	#N/A	#N/A	#N/A	#N/A	#N/A	#N/A	#N/A	#N/A	#N/A	#N/A	1.1	2.2	1.1	1.5	1	0	1	0
Tb927.10.11770	hypothetical protein, conserved	Mito.pathway	#N/A	#N/A	#N/A	#N/A	#N/A	#N/A	#N/A	#N/A	#N/A	#N/A	1.2	3.9	1	1.5	1	0	1	0
Tb927.8.3090	hypothetical protein, conserved	Mito.pathway	#N/A	#N/A	#N/A	#N/A	#N/A	#N/A	#N/A	#N/A	#N/A	#N/A	1.1	1.6	1.1	1.5	1	0	1	0
Tb927.3.1720	hypothetical protein, conserved	Mito.pathway	#N/A	#N/A	#N/A	#N/A	#N/A	#N/A	#N/A	#N/A	#N/A	#N/A	1	2.3	1.1	1.7	1	0	1	0
Tb927.10.9830	hypothetical protein, conserved	Mito.pathway	#N/A	#N/A	#N/A	#N/A	#N/A	#N/A	#N/A	#N/A	#N/A	#N/A	1	1.5	1.1	1.7	1	0	1	0
Tb927.3.2880	Mitochondrial ATP synthase subunit, putative	Mito.pathway	#N/A	#N/A	#N/A	#N/A	#N/A	#N/A	#N/A	#N/A	#N/A	#N/A	1.1	2.7	1.1	1.8	1	0	1	0
Tb927.4.1810	Mitchondrial LSU ribosomal protein	Mito.translation	#N/A	#N/A	#N/A	#N/A	#N/A	#N/A	#N/A	#N/A	#N/A	#N/A	0.8	1.5	1.1	1.6	1	0	1	0
Tb927.10.10440	mitochondrial carrier protein, MCP8	Mito.transport	#N/A	#N/A	#N/A	#N/A	#N/A	#N/A	#N/A	#N/A	#N/A	#N/A	0.8	3.9	1.1	2.1	1	0	1	0
Tb927.10.5680	procyclin-associated gene 1 (PAG1) protein, putative	PAG	#N/A	#N/A	#N/A	#N/A	#N/A	#N/A	#N/A	#N/A	#N/A	#N/A	1	3.5	1	1.8	1	0	1	0
Tb927.1.2160	calpain-like protein fragment, putative	Protease	#N/A	#N/A	#N/A	#N/A	#N/A	#N/A	#N/A	#N/A	#N/A	#N/A	0.9	4.9	1	2	1	0	1	0
Tb927.1.2150	calpain-like protein fragment, putative,calpain-like cysteine peptidase, Clan CA, family C2	Protease	#N/A	#N/A	#N/A	#N/A	#N/A	#N/A	#N/A	#N/A	#N/A	#N/A	0.9	2.8	0.9	1.7	1	0	1	0
Tb927.8.550	peptide methionine sulfoxide reductase, putative	Protease	#N/A	#N/A	#N/A	#N/A	#N/A	#N/A	#N/A	#N/A	#N/A	#N/A	0.8	1.7	0.9	1.5	1	0	1	0
Tb927.3.4860	MKK1 protein kinase	Protein.kinase	#N/A	#N/A	#N/A	#N/A	#N/A	#N/A	#N/A	#N/A	#N/A	#N/A	0.9	1.5	0.9	1.7	1	0	1	0
Tb927.11.1780	protein phosphatase 2C, putative	Protein.phosphatase	#N/A	#N/A	#N/A	#N/A	#N/A	#N/A	#N/A	#N/A	#N/A	#N/A	1	2.2	1	1.6	1	0	1	0
Tb927.11.1370	glutaredoxin GRX1	Redox	#N/A	#N/A	#N/A	#N/A	#N/A	#N/A	#N/A	#N/A	#N/A	#N/A	1.2	4.1	1.1	2.9	1	0	1	0
Tb927.1.1770	glutaredoxin GRX2	Redox	#N/A	#N/A	#N/A	#N/A	#N/A	#N/A	#N/A	#N/A	#N/A	#N/A	0.9	1.7	0.8	1.5	1	0	1	0
Tb927.9.1810	60S ribosomal protein L35	Ribosome	#N/A	#N/A	#N/A	#N/A	#N/A	#N/A	#N/A	#N/A	#N/A	#N/A	1	1.6	1	1.6	1	0	1	0
Tb927.11.4460	ALBA1	RNA.binding	#N/A	#N/A	#N/A	#N/A	#N/A	#N/A	#N/A	#N/A	#N/A	#N/A	0.9	1.9	1.1	1.5	1	0	1	0
Tb927.9.13280	DRBD9	RNA.binding	#N/A	#N/A	#N/A	#N/A	#N/A	#N/A	#N/A	#N/A	#N/A	#N/A	1	1.5	1.2	1.6	1	0	1	0
Tb927.7.4980	ZC3H23 POMP35	RNA.binding	#N/A	#N/A	#N/A	#N/A	#N/A	#N/A	#N/A	#N/A	#N/A	#N/A	1	1.6	1.1	1.5	1	0	1	0
Tb927.1.2200	ZC3H4	RNA.binding	#N/A	#N/A	#N/A	#N/A	#N/A	#N/A	#N/A	#N/A	#N/A	#N/A	1.4	7.2	1.2	3.5	1	0	1	0
Tb927.3.720	ZFP3	RNA.binding	#N/A	#N/A	#N/A	#N/A	#N/A	#N/A	#N/A	#N/A	#N/A	#N/A	0.9	5.5	1	1.8	1	0	1	0
Tb927.6.2700	small nuclear ribonucleoprotein Sm-E	RNA.processing	#N/A	#N/A	#N/A	#N/A	#N/A	#N/A	#N/A	#N/A	#N/A	#N/A	1	2.1	1.2	1.7	1	0	1	0
Tb927.9.10250	small nuclear ribonucleoprotein Sm-F	RNA.processing	#N/A	#N/A	#N/A	#N/A	#N/A	#N/A	#N/A	#N/A	#N/A	#N/A	1.2	2.5	1.3	1.9	1	0	1	0
Tb927.11.14310	small nuclear ribonucleoprotein Sm-G	RNA.processing	#N/A	#N/A	#N/A	#N/A	#N/A	#N/A	#N/A	#N/A	#N/A	#N/A	0.9	2.3	0.8	1.8	1	0	1	0
Tb927.2.4540	small nuclear ribonucleoprotein Sm-B	RNA.processing	#N/A	#N/A	#N/A	#N/A	#N/A	#N/A	#N/A	#N/A	#N/A	#N/A	1	1.7	1	1.5	1	0	1	0
Tb927.11.18680	dynein light chain LC8, putative (DYNLL1)	RNA.synthesis	#N/A	#N/A	#N/A	#N/A	#N/A	#N/A	#N/A	#N/A	#N/A	#N/A	1.5	1.8	1.2	2.1	1	0	1	0
Tb927.3.5580	tryptophanyl-tRNA synthetase, putative	Translation.tRNA	#N/A	#N/A	#N/A	#N/A	#N/A	#N/A	#N/A	#N/A	#N/A	#N/A	1.1	1.9	1	1.6	1	0	1	0
Tb927.4.480	Cullin binding, putative	Ubiquitin.proteasome	#N/A	#N/A	#N/A	#N/A	#N/A	#N/A	#N/A	#N/A	#N/A	#N/A	0.9	1.7	1.1	1.9	1	0	1	0
Tb927.4.2710	ubiquitin-conjugating enzyme e2, putative	Ubiquitin.proteasome	#N/A	#N/A	#N/A	#N/A	#N/A	#N/A	#N/A	#N/A	#N/A	#N/A	1	2	1	2	1	0	1	0
Tb927.6.3140	Ubiquitin-like protein	Ubiquitin.proteasome	#N/A	#N/A	#N/A	#N/A	#N/A	#N/A	#N/A	#N/A	#N/A	#N/A	1.2	1.8	1	1.5	1	0	1	0
Tb927.10.2340	hypothetical protein, conserved, t-SNARE like	Vesicular.transport	#N/A	#N/A	#N/A	#N/A	#N/A	#N/A	#N/A	#N/A	#N/A	#N/A	1	1.9	1.2	1.6	1	0	1	0
Tb927.3.4910	signal peptide peptidase, putative,aspartic peptidase, clan AD, family A22B, putative	Vesicular.transport	#N/A	#N/A	#N/A	#N/A	#N/A	#N/A	#N/A	#N/A	#N/A	#N/A	0.9	1.7	1.1	1.6	1	0	1	0
Tb927.3.5570	syntaxin, putative	Vesicular.transport	#N/A	#N/A	#N/A	#N/A	#N/A	#N/A	#N/A	#N/A	#N/A	#N/A	0.9	1.6	0.9	1.5	1	0	1	0
Tb927.4.550	Zinc knuckle, putative	Zinc.finger	#N/A	#N/A	#N/A	#N/A	#N/A	#N/A	#N/A	#N/A	#N/A	#N/A	0.9	1.9	0.9	1.5	1	0	1	0
Tb927.6.4810	zinc-binding protein (Yippee), putative	Zinc.finger	#N/A	#N/A	#N/A	#N/A	#N/A	#N/A	#N/A	#N/A	#N/A	#N/A	0.9	2	0.9	1.9	1	0	1	0
Tb927.5.4010	Enriched in surface-labeled proteome protein 4 (ESP4)	ZUnknown	#N/A	#N/A	#N/A	#N/A	missense_variant	#N/A	missense_variant	#N/A	#N/A	#N/A	1.2	2.6	0.8	1.5	1	0	1	1
Tb927.8.490	hypothetical protein	ZUnknown	#N/A	#N/A	#N/A	#N/A	#N/A	#N/A	missense_variant	#N/A	#N/A	#N/A	2	6.6	2.1	5.6	1	0	1	1
Tb927.9.7860	hypothetical protein, conserved	ZUnknown	#N/A	#N/A	#N/A	#N/A	#N/A	#N/A	missense_variant	#N/A	#N/A	#N/A	1.3	2.6	0.9	2.5	1	0	1	1
Tb927.9.7880	hypothetical protein, conserved	ZUnknown	#N/A	#N/A	missense_variant	#N/A	missense_variant	#N/A	missense_variant	frameshift_variant	#N/A	#N/A	1.5	2.9	1.7	2.7	1	0	1	1
Tb927.9.7910	hypothetical protein, conserved	ZUnknown	#N/A	#N/A	missense_variant	#N/A	missense_variant	#N/A	missense_variant	#N/A	#N/A	#N/A	0.3	4.2	1	2.2	1	1	1	1
Tb927.9.16950	hypothetical protein	ZUnknown	#N/A	#N/A	missense_variant	#N/A	#N/A	#N/A	missense_variant	#N/A	#N/A	#N/A	1.3	3.6	1.4	1.9	1	0	1	1
Tb927.4.3200	hypothetical protein, conserved	ZUnknown	#N/A	#N/A	missense_variant	#N/A	#N/A	#N/A	missense_variant	#N/A	#N/A	#N/A	0.6	2.2	1	1.5	1	0	1	1
Tb927.6.1790	hypothetical protein	ZUnknown	missense_variant	disruptive_inframe_deletion	#N/A	disruptive_inframe_deletion	#N/A	#N/A	missense_variant	disruptive_inframe_deletion	#N/A	#N/A	1.9	21.5	2	8	1	0	1	1
Tb927.11.12130	hypothetical protein	ZUnknown	missense_variant	frameshift_variant	missense_variant	frameshift_variant	missense_variant	frameshift_variant	missense_variant	frameshift_variant	missense_variant	frameshift_variant	2.1	15.4	2.2	8.8	1	0	1	1
Tb927.7.2430	hypothetical protein	ZUnknown	missense_variant	#N/A	missense_variant	#N/A	missense_variant	frameshift_variant	missense_variant	frameshift_variant	missense_variant	#N/A	1.6	18.9	1.5	7.6	1	0	1	1
Tb927.5.4000	hypothetical protein	ZUnknown	missense_variant	#N/A	missense_variant	#N/A	missense_variant	#N/A	missense_variant	#N/A	missense_variant	#N/A	1.5	3.8	1.1	2.2	1	0	1	1
Tb927.9.6570	hypothetical protein, conserved	ZUnknown	missense_variant	frameshift_variant	missense_variant	frameshift_variant	missense_variant	frameshift_variant	missense_variant	frameshift_variant	missense_variant	frameshift_variant	5.1	57.5	4.2	22.5	1	0	1	1
Tb927.4.3240	hypothetical protein, conserved	ZUnknown	missense_variant	#N/A	missense_variant	#N/A	missense_variant	#N/A	missense_variant	#N/A	missense_variant	#N/A	3.3	9	4.3	8	1	0	1	1
Tb927.9.2840	Fam77 cell surface phylome protein	ZUnknown	missense_variant	#N/A	missense_variant	#N/A	#N/A	#N/A	missense_variant	#N/A	#N/A	#N/A	1.2	7.9	2.4	2	1	0	1	1
Tb927.9.15870	hypothetical protein	ZUnknown	missense_variant	#N/A	missense_variant	#N/A	#N/A	#N/A	missense_variant	#N/A	#N/A	#N/A	1.5	2.8	1.5	1.7	1	0	1	1
Tb927.4.3520	Amastin surface glycoprotein, putative	ZUnknown	#N/A	#N/A	#N/A	#N/A	#N/A	#N/A	#N/A	#N/A	#N/A	#N/A	1	1.7	1	1.5	1	0	1	0
Tb927.3.880	Ankyrin repeats (3 copies), putative	ZUnknown	#N/A	#N/A	#N/A	#N/A	#N/A	#N/A	#N/A	#N/A	#N/A	#N/A	1.1	1.6	1	1.5	1	0	1	0
Tb927.11.380	B9 domain-containing protein 2 (b9d2)	ZUnknown	#N/A	#N/A	#N/A	#N/A	#N/A	#N/A	#N/A	#N/A	#N/A	#N/A	1.1	1.5	0.8	1.5	1	0	1	0
Tb927.10.6770	BRCA1 C Terminus (BRCT) domain containing protein, putative	ZUnknown	#N/A	#N/A	#N/A	#N/A	#N/A	#N/A	#N/A	#N/A	#N/A	#N/A	0.9	2.4	0.9	1.7	1	0	1	0
Tb927.10.14760	clathrin light chain, putative	ZUnknown	#N/A	#N/A	#N/A	#N/A	#N/A	#N/A	#N/A	#N/A	#N/A	#N/A	1.1	2.5	1.1	1.7	1	0	1	0
Tb927.11.9040	conserved protein	ZUnknown	#N/A	#N/A	#N/A	#N/A	#N/A	#N/A	#N/A	#N/A	#N/A	#N/A	0.9	2.5	1	1.5	1	0	1	0
Tb927.8.3730	COPI associated protein, putative	ZUnknown	#N/A	#N/A	#N/A	#N/A	#N/A	#N/A	#N/A	#N/A	#N/A	#N/A	0.9	5.3	1.3	2.9	1	0	1	0
Tb927.10.1280	Domain of unknown function (DUF4499), putative	ZUnknown	#N/A	#N/A	#N/A	#N/A	#N/A	#N/A	#N/A	#N/A	#N/A	#N/A	1.2	1.5	1.2	1.6	1	0	1	0
Tb927.1.3390	Eukaryotic protein of unknown function (DUF866), putative	ZUnknown	#N/A	#N/A	#N/A	#N/A	#N/A	#N/A	#N/A	#N/A	#N/A	#N/A	1.3	1.8	1	1.5	1	0	1	0
Tb927.2.3190	Got1/Sft2-like family, putative	ZUnknown	#N/A	#N/A	#N/A	#N/A	#N/A	#N/A	#N/A	#N/A	#N/A	#N/A	0.9	1.7	0.9	1.5	1	0	1	0
Tb927.3.2850	Got1/Sft2-like family, putative	ZUnknown	#N/A	#N/A	#N/A	#N/A	#N/A	#N/A	#N/A	#N/A	#N/A	#N/A	0.8	3.9	0.9	2	1	0	1	0
Tb927.5.3680	GPI-GlcNAc transferase complex, PIG-H component, putative	ZUnknown	#N/A	#N/A	#N/A	#N/A	#N/A	#N/A	#N/A	#N/A	#N/A	#N/A	1.4	1.8	0.9	1.7	1	0	1	0
Tb927.11.12140	hypothetical protein	ZUnknown	#N/A	frameshift_variant	#N/A	frameshift_variant	#N/A	disruptive_inframe_insertion	#N/A	disruptive_inframe_insertion	#N/A	#N/A	1	9.5	0.9	3.9	1	0	1	0
Tb927.5.1480	hypothetical protein	ZUnknown	#N/A	frameshift_variant	#N/A	frameshift_variant	#N/A	frameshift_variant	#N/A	frameshift_variant	#N/A	#N/A	1.5	11.4	0.9	3	1	0	1	0
Tb927.7.3690	hypothetical protein	ZUnknown	#N/A	frameshift_variant	#N/A	frameshift_variant	#N/A	frameshift_variant	#N/A	frameshift_variant	#N/A	frameshift_variant	2.1	28.3	2.3	11.4	1	0	1	0
Tb927.10.12790	hypothetical protein	ZUnknown	#N/A	frameshift_variant	#N/A	frameshift_variant	#N/A	frameshift_variant	#N/A	frameshift_variant	#N/A	#N/A	2.9	52.9	1.9	17	1	0	1	0
Tb927.11.6880	hypothetical protein	ZUnknown	#N/A	frameshift_variant	#N/A	frameshift_variant	#N/A	frameshift_variant	#N/A	frameshift_variant	#N/A	frameshift_variant	4	101.1	3	36.5	1	0	1	0
Tb927.4.2610	hypothetical protein	ZUnknown	#N/A	frameshift_variant	#N/A	frameshift_variant	#N/A	#N/A	#N/A	frameshift_variant	#N/A	#N/A	0.8	2.1	0.8	1.8	1	0	1	0
Tb927.10.2400	hypothetical protein	ZUnknown	#N/A	frameshift_variant	#N/A	frameshift_variant	#N/A	#N/A	#N/A	frameshift_variant	#N/A	#N/A	1	3.9	0.9	2.8	1	0	1	0
Tb927.7.6330	hypothetical protein	ZUnknown	#N/A	frameshift_variant	#N/A	frameshift_variant	#N/A	#N/A	#N/A	#N/A	#N/A	#N/A	1.4	15.1	1.7	7.4	1	0	1	0
Tb927.6.2530	hypothetical protein	ZUnknown	#N/A	inframe_deletion	#N/A	#N/A	#N/A	inframe_deletion	#N/A	inframe_deletion	#N/A	#N/A	1.4	18.1	1.3	5.7	1	0	1	0
Tb927.8.1760	hypothetical protein	ZUnknown	#N/A	inframe_insertion	#N/A	frameshift_variant+stop_gained	#N/A	#N/A	#N/A	#N/A	#N/A	#N/A	1	4.3	1	2.9	1	0	1	0
Tb927.11.16780	hypothetical protein	ZUnknown	#N/A	inframe_insertion	#N/A	inframe_insertion	#N/A	#N/A	#N/A	#N/A	#N/A	#N/A	1.3	22.3	1.3	7.4	1	0	1	0
Tb927.11.7810	hypothetical protein	ZUnknown	#N/A	#N/A	#N/A	disruptive_inframe_deletion	#N/A	disruptive_inframe_deletion	#N/A	#N/A	#N/A	#N/A	1.2	12.2	1.2	4.5	1	0	1	0
Tb927.2.4440	hypothetical protein	ZUnknown	#N/A	#N/A	#N/A	#N/A	#N/A	frameshift_variant	#N/A	frameshift_variant	#N/A	#N/A	0.9	7.9	0.9	3.4	1	0	1	0
Tb927.8.4300	hypothetical protein	ZUnknown	#N/A	#N/A	#N/A	#N/A	#N/A	frameshift_variant	#N/A	frameshift_variant	#N/A	#N/A	1.6	18.1	1.3	7.1	1	0	1	0
Tb927.9.7960	hypothetical protein	ZUnknown	#N/A	#N/A	#N/A	#N/A	#N/A	frameshift_variant	#N/A	#N/A	#N/A	#N/A	1.2	2.8	1.1	1.6	1	0	1	0
Tb927.1.4020	hypothetical protein	ZUnknown	#N/A	#N/A	#N/A	#N/A	#N/A	frameshift_variant	#N/A	#N/A	#N/A	#N/A	1	12.3	1	4.5	1	0	1	0
Tb927.9.16070	hypothetical protein	ZUnknown	#N/A	#N/A	#N/A	#N/A	#N/A	#N/A	#N/A	#N/A	#N/A	#N/A	0.8	2.3	0.8	1.5	1	0	1	0
Tb927.10.7530	hypothetical protein	ZUnknown	#N/A	#N/A	#N/A	#N/A	#N/A	#N/A	#N/A	#N/A	#N/A	#N/A	0.7	1.8	0.8	1.5	1	0	1	0
Tb927.10.10040	hypothetical protein	ZUnknown	#N/A	#N/A	#N/A	#N/A	#N/A	#N/A	#N/A	#N/A	#N/A	#N/A	0.8	1.7	0.9	1.5	1	0	1	0
Tb927.6.1300	hypothetical protein	ZUnknown	#N/A	#N/A	#N/A	#N/A	#N/A	#N/A	#N/A	#N/A	#N/A	#N/A	0.8	2.1	1	1.5	1	0	1	0
Tb927.11.12990	hypothetical protein	ZUnknown	#N/A	#N/A	#N/A	#N/A	#N/A	#N/A	#N/A	#N/A	#N/A	#N/A	0.9	1.7	1	1.5	1	0	1	0
Tb927.11.13430	hypothetical protein	ZUnknown	#N/A	#N/A	#N/A	#N/A	#N/A	#N/A	#N/A	#N/A	#N/A	#N/A	1	1.5	1.1	1.5	1	0	1	0
Tb927.11.2870	hypothetical protein	ZUnknown	#N/A	#N/A	#N/A	#N/A	#N/A	#N/A	#N/A	#N/A	#N/A	#N/A	0.9	3	0.9	1.6	1	0	1	0
Tb927.9.16410	hypothetical protein	ZUnknown	#N/A	#N/A	#N/A	#N/A	#N/A	#N/A	#N/A	#N/A	#N/A	#N/A	0.8	1.6	0.9	1.6	1	0	1	0
Tb927.4.4390	hypothetical protein	ZUnknown	#N/A	#N/A	#N/A	#N/A	#N/A	#N/A	#N/A	#N/A	#N/A	#N/A	1	2.2	1	1.6	1	0	1	0
Tb927.3.5770	hypothetical protein	ZUnknown	#N/A	#N/A	#N/A	#N/A	#N/A	#N/A	#N/A	#N/A	#N/A	#N/A	1	1.7	1	1.6	1	0	1	0
Tb927.8.3270	hypothetical protein	ZUnknown	#N/A	#N/A	#N/A	#N/A	#N/A	#N/A	#N/A	#N/A	#N/A	#N/A	0.9	1.6	1	1.6	1	0	1	0
Tb927.1.3890	hypothetical protein	ZUnknown	#N/A	#N/A	#N/A	#N/A	#N/A	#N/A	#N/A	#N/A	#N/A	#N/A	0.9	1.9	1.1	1.6	1	0	1	0
Tb927.9.3180	hypothetical protein	ZUnknown	#N/A	#N/A	#N/A	#N/A	#N/A	#N/A	#N/A	#N/A	#N/A	#N/A	0.9	1.7	1.1	1.6	1	0	1	0
Tb927.4.2090	hypothetical protein	ZUnknown	#N/A	#N/A	#N/A	#N/A	#N/A	#N/A	#N/A	#N/A	#N/A	#N/A	1.1	2.4	1.2	1.6	1	0	1	0
Tb927.1.5180	hypothetical protein	ZUnknown	#N/A	#N/A	#N/A	#N/A	#N/A	#N/A	#N/A	#N/A	#N/A	#N/A	0.9	2.1	1.2	1.6	1	0	1	0
Tb927.10.13060	hypothetical protein	ZUnknown	#N/A	#N/A	#N/A	#N/A	#N/A	#N/A	#N/A	#N/A	#N/A	#N/A	0.7	2.3	0.8	1.7	1	0	1	0
Tb927.10.12570	hypothetical protein	ZUnknown	#N/A	#N/A	#N/A	#N/A	#N/A	#N/A	#N/A	#N/A	#N/A	#N/A	0.6	2.1	0.8	1.7	1	0	1	0
Tb927.6.420	hypothetical protein	ZUnknown	#N/A	#N/A	#N/A	#N/A	#N/A	#N/A	#N/A	#N/A	#N/A	#N/A	0.8	2.3	0.9	1.7	1	0	1	0
Tb927.11.9410	hypothetical protein	ZUnknown	#N/A	#N/A	#N/A	#N/A	#N/A	#N/A	#N/A	#N/A	#N/A	#N/A	0.9	2.1	0.9	1.7	1	0	1	0
Tb927.4.1230	hypothetical protein	ZUnknown	#N/A	#N/A	#N/A	#N/A	#N/A	#N/A	#N/A	#N/A	#N/A	#N/A	0.9	2.1	0.9	1.7	1	0	1	0
Tb927.9.13200	hypothetical protein	ZUnknown	#N/A	#N/A	#N/A	#N/A	#N/A	#N/A	#N/A	#N/A	#N/A	#N/A	1	2.2	1	1.7	1	0	1	0
Tb927.3.5780	hypothetical protein	ZUnknown	#N/A	#N/A	#N/A	#N/A	#N/A	#N/A	#N/A	#N/A	#N/A	#N/A	1.1	1.9	1	1.7	1	0	1	0
Tb927.10.6270	hypothetical protein	ZUnknown	#N/A	#N/A	#N/A	#N/A	#N/A	#N/A	#N/A	#N/A	#N/A	#N/A	1.1	1.6	1.2	1.7	1	0	1	0
Tb927.10.1640	hypothetical protein	ZUnknown	#N/A	#N/A	#N/A	#N/A	#N/A	#N/A	#N/A	#N/A	#N/A	#N/A	0.7	1.6	0.8	1.8	1	0	1	0
Tb927.1.2760	hypothetical protein	ZUnknown	#N/A	#N/A	#N/A	#N/A	#N/A	#N/A	#N/A	#N/A	#N/A	#N/A	0.9	3.5	0.9	1.8	1	0	1	0
Tb927.9.10650	hypothetical protein	ZUnknown	#N/A	#N/A	#N/A	#N/A	#N/A	#N/A	#N/A	#N/A	#N/A	#N/A	0.8	3	0.9	1.8	1	0	1	0
Tb927.6.1150	hypothetical protein	ZUnknown	#N/A	#N/A	#N/A	#N/A	#N/A	#N/A	#N/A	#N/A	#N/A	#N/A	0.9	2.9	0.9	1.8	1	0	1	0
Tb927.10.1000	hypothetical protein	ZUnknown	#N/A	#N/A	#N/A	#N/A	#N/A	#N/A	#N/A	#N/A	#N/A	#N/A	0.9	2.2	0.9	1.8	1	0	1	0
Tb927.11.14510	hypothetical protein	ZUnknown	#N/A	#N/A	#N/A	#N/A	#N/A	#N/A	#N/A	#N/A	#N/A	#N/A	1.1	3.4	1.1	1.8	1	0	1	0
Tb07.26A24.210	hypothetical protein	ZUnknown	#N/A	#N/A	#N/A	#N/A	#N/A	#N/A	#N/A	#N/A	#N/A	#N/A	1	2.3	1.1	1.8	1	0	1	0
Tb927.1.5250	hypothetical protein	ZUnknown	#N/A	#N/A	#N/A	#N/A	#N/A	#N/A	#N/A	#N/A	#N/A	#N/A	1.2	2.3	1.2	1.8	1	0	1	0
Tb927.3.3600	hypothetical protein	ZUnknown	#N/A	#N/A	#N/A	#N/A	#N/A	#N/A	#N/A	#N/A	#N/A	#N/A	0.8	3.2	0.8	1.9	1	0	1	0
Tb927.10.9610	hypothetical protein	ZUnknown	#N/A	#N/A	#N/A	#N/A	#N/A	#N/A	#N/A	#N/A	#N/A	#N/A	0.9	3.4	0.9	1.9	1	0	1	0
Tb927.10.13410	hypothetical protein	ZUnknown	#N/A	#N/A	#N/A	#N/A	#N/A	#N/A	#N/A	#N/A	#N/A	#N/A	0.9	3	0.9	1.9	1	0	1	0
Tb927.11.15260	hypothetical protein	ZUnknown	#N/A	#N/A	#N/A	#N/A	#N/A	#N/A	#N/A	#N/A	#N/A	#N/A	0.9	2.4	0.9	1.9	1	0	1	0
Tb927.4.1240	hypothetical protein	ZUnknown	#N/A	#N/A	#N/A	#N/A	#N/A	#N/A	#N/A	#N/A	#N/A	#N/A	0.9	2.3	0.9	1.9	1	0	1	0
Tb927.6.4110	hypothetical protein	ZUnknown	#N/A	#N/A	#N/A	#N/A	#N/A	#N/A	#N/A	#N/A	#N/A	#N/A	0.9	3.2	0.8	2	1	0	1	0
Tb927.11.9380	hypothetical protein	ZUnknown	#N/A	#N/A	#N/A	#N/A	#N/A	#N/A	#N/A	#N/A	#N/A	#N/A	1.1	3.6	1	2	1	0	1	0
Tb927.8.3670	hypothetical protein	ZUnknown	#N/A	#N/A	#N/A	#N/A	#N/A	#N/A	#N/A	#N/A	#N/A	#N/A	0.9	3.2	1	2	1	0	1	0
Tb927.10.6420	hypothetical protein	ZUnknown	#N/A	#N/A	#N/A	#N/A	#N/A	#N/A	#N/A	#N/A	#N/A	#N/A	1	2.8	1.1	2	1	0	1	0
Tb927.10.14290	hypothetical protein	ZUnknown	#N/A	#N/A	#N/A	#N/A	#N/A	#N/A	#N/A	#N/A	#N/A	#N/A	0.8	3.7	0.8	2.1	1	0	1	0
Tb927.11.16180	hypothetical protein	ZUnknown	#N/A	#N/A	#N/A	#N/A	#N/A	#N/A	#N/A	#N/A	#N/A	#N/A	1.1	3.7	1.1	2.1	1	0	1	0
Tb927.10.2420	hypothetical protein	ZUnknown	#N/A	#N/A	#N/A	#N/A	#N/A	#N/A	#N/A	#N/A	#N/A	#N/A	1	3	1.1	2.1	1	0	1	0
Tb927.8.500	hypothetical protein	ZUnknown	#N/A	#N/A	#N/A	#N/A	#N/A	#N/A	#N/A	#N/A	#N/A	#N/A	0.9	2.7	1.3	2.1	1	0	1	0
Tb927.10.5410	hypothetical protein	ZUnknown	#N/A	#N/A	#N/A	#N/A	#N/A	#N/A	#N/A	#N/A	#N/A	#N/A	1.1	2.8	0.8	2.2	1	0	1	0
Tb927.11.10680	hypothetical protein	ZUnknown	#N/A	#N/A	#N/A	#N/A	#N/A	#N/A	#N/A	#N/A	#N/A	#N/A	1.2	2.8	0.9	2.2	1	0	1	0
Tb927.7.7310	hypothetical protein	ZUnknown	#N/A	#N/A	#N/A	#N/A	#N/A	#N/A	#N/A	#N/A	#N/A	#N/A	0.9	4.1	1	2.2	1	0	1	0
Tb927.9.2150	hypothetical protein	ZUnknown	#N/A	#N/A	#N/A	#N/A	#N/A	#N/A	#N/A	#N/A	#N/A	#N/A	1.1	4.1	1.1	2.2	1	0	1	0
Tb927.6.4730	hypothetical protein	ZUnknown	#N/A	#N/A	#N/A	#N/A	#N/A	#N/A	#N/A	#N/A	#N/A	#N/A	1	5.1	1.3	2.2	1	0	1	0
Tb927.5.1740	hypothetical protein	ZUnknown	#N/A	#N/A	#N/A	#N/A	#N/A	#N/A	#N/A	#N/A	#N/A	#N/A	1.2	6.8	0.9	2.3	1	0	1	0
Tb927.10.12610	hypothetical protein	ZUnknown	#N/A	#N/A	#N/A	#N/A	#N/A	#N/A	#N/A	#N/A	#N/A	#N/A	1.2	3	1.1	2.3	1	0	1	0
Tb927.8.5790	hypothetical protein	ZUnknown	#N/A	#N/A	#N/A	#N/A	#N/A	#N/A	#N/A	#N/A	#N/A	#N/A	1.1	3.7	0.9	2.4	1	0	1	0
Tb927.11.8360	hypothetical protein	ZUnknown	#N/A	#N/A	#N/A	#N/A	#N/A	#N/A	#N/A	#N/A	#N/A	#N/A	1	4.8	1	2.4	1	0	1	0
Tb927.10.3190	hypothetical protein	ZUnknown	#N/A	#N/A	#N/A	#N/A	#N/A	#N/A	#N/A	#N/A	#N/A	#N/A	1	4.3	1	2.4	1	0	1	0
Tb927.7.3480	hypothetical protein	ZUnknown	#N/A	#N/A	#N/A	#N/A	#N/A	#N/A	#N/A	#N/A	#N/A	#N/A	1	2.2	1	2.4	1	0	1	0
Tb927.11.15720	hypothetical protein	ZUnknown	#N/A	#N/A	#N/A	#N/A	#N/A	#N/A	#N/A	#N/A	#N/A	#N/A	1	6.7	1.1	2.4	1	0	1	0
Tb927.11.10830	hypothetical protein	ZUnknown	#N/A	#N/A	#N/A	#N/A	#N/A	#N/A	#N/A	#N/A	#N/A	#N/A	1.1	4.9	1.1	2.4	1	0	1	0
Tb927.11.15670	hypothetical protein	ZUnknown	#N/A	#N/A	#N/A	#N/A	#N/A	#N/A	#N/A	#N/A	#N/A	#N/A	1	3.1	1.1	2.4	1	0	1	0
Tb927.10.11710	hypothetical protein	ZUnknown	#N/A	#N/A	#N/A	#N/A	#N/A	#N/A	#N/A	#N/A	#N/A	#N/A	1.2	3.9	0.9	2.5	1	0	1	0
Tb927.4.2810	hypothetical protein	ZUnknown	#N/A	#N/A	#N/A	#N/A	#N/A	#N/A	#N/A	#N/A	#N/A	#N/A	0.9	5	1	2.7	1	0	1	0
Tb927.1.40	hypothetical protein	ZUnknown	#N/A	#N/A	#N/A	#N/A	#N/A	#N/A	#N/A	#N/A	#N/A	#N/A	1.6	4.2	1.3	2.7	1	0	1	0
Tb927.4.1010	hypothetical protein	ZUnknown	#N/A	#N/A	#N/A	#N/A	#N/A	#N/A	#N/A	#N/A	#N/A	#N/A	1	9.3	1	2.8	1	0	1	0
Tb927.7.6780	hypothetical protein	ZUnknown	#N/A	#N/A	#N/A	#N/A	#N/A	#N/A	#N/A	#N/A	#N/A	#N/A	1.2	6.1	1.3	2.8	1	0	1	0
Tb927.10.2170	hypothetical protein	ZUnknown	#N/A	#N/A	#N/A	#N/A	#N/A	#N/A	#N/A	#N/A	#N/A	#N/A	1.5	3.7	1.3	2.8	1	0	1	0
Tb927.11.6860	hypothetical protein	ZUnknown	#N/A	#N/A	#N/A	#N/A	#N/A	#N/A	#N/A	#N/A	#N/A	#N/A	0.8	7	0.9	2.9	1	0	1	0
Tb927.9.10990	hypothetical protein	ZUnknown	#N/A	#N/A	#N/A	#N/A	#N/A	#N/A	#N/A	#N/A	#N/A	#N/A	0.7	6.9	1	3	1	0	1	0
Tb927.11.820	hypothetical protein	ZUnknown	#N/A	#N/A	#N/A	#N/A	#N/A	#N/A	#N/A	#N/A	#N/A	#N/A	0.7	5.4	0.7	3.1	1	0	1	0
Tb927.7.5860	hypothetical protein	ZUnknown	#N/A	#N/A	#N/A	#N/A	#N/A	#N/A	#N/A	#N/A	#N/A	#N/A	1.1	3.9	1.1	3.2	1	0	1	0
Tb927.8.2320	hypothetical protein	ZUnknown	#N/A	#N/A	#N/A	#N/A	#N/A	#N/A	#N/A	#N/A	#N/A	#N/A	1.2	5.6	1.2	3.2	1	0	1	0
Tb927.4.4780	hypothetical protein	ZUnknown	#N/A	#N/A	#N/A	#N/A	#N/A	#N/A	#N/A	#N/A	#N/A	#N/A	0.9	5.8	0.9	3.4	1	0	1	0
Tb927.7.7020	hypothetical protein	ZUnknown	#N/A	#N/A	#N/A	#N/A	#N/A	#N/A	#N/A	#N/A	#N/A	#N/A	1.1	5.8	1.1	3.4	1	0	1	0
Tb927.3.1650	hypothetical protein	ZUnknown	#N/A	#N/A	#N/A	#N/A	#N/A	#N/A	#N/A	#N/A	#N/A	#N/A	1.1	7.9	1.2	3.4	1	0	1	0
Tb927.4.2690	hypothetical protein	ZUnknown	#N/A	#N/A	#N/A	#N/A	#N/A	#N/A	#N/A	#N/A	#N/A	#N/A	0.9	8.9	0.8	3.5	1	0	1	0
Tb927.8.3760	hypothetical protein	ZUnknown	#N/A	#N/A	#N/A	#N/A	#N/A	#N/A	#N/A	#N/A	#N/A	#N/A	1.2	7.7	1.2	3.7	1	0	1	0
Tb927.11.2480	hypothetical protein	ZUnknown	#N/A	#N/A	#N/A	#N/A	#N/A	#N/A	#N/A	#N/A	#N/A	#N/A	1	7.1	1.1	3.9	1	0	1	0
Tb927.11.2450	hypothetical protein	ZUnknown	#N/A	#N/A	#N/A	#N/A	#N/A	#N/A	#N/A	#N/A	#N/A	#N/A	1.2	6.4	1.2	4.1	1	0	1	0
Tb927.10.9630	hypothetical protein	ZUnknown	#N/A	#N/A	#N/A	#N/A	#N/A	#N/A	#N/A	#N/A	#N/A	#N/A	1.2	9.9	1	4.3	1	0	1	0
Tb927.10.4410	hypothetical protein	ZUnknown	#N/A	#N/A	#N/A	#N/A	#N/A	#N/A	#N/A	#N/A	#N/A	#N/A	0.9	12.5	1	4.5	1	0	1	0
Tb927.9.8320	hypothetical protein	ZUnknown	#N/A	#N/A	#N/A	#N/A	#N/A	#N/A	#N/A	#N/A	#N/A	#N/A	1.4	8.1	1.4	4.6	1	0	1	0
Tb927.10.3410	hypothetical protein	ZUnknown	#N/A	#N/A	#N/A	#N/A	#N/A	#N/A	#N/A	#N/A	#N/A	#N/A	1.2	11	1.8	4.7	1	0	1	0
Tb927.3.3210	hypothetical protein	ZUnknown	#N/A	#N/A	#N/A	#N/A	#N/A	#N/A	#N/A	#N/A	#N/A	#N/A	1.3	15.6	1.5	5.8	1	0	1	0
Tb927.11.8340	hypothetical protein	ZUnknown	#N/A	#N/A	#N/A	#N/A	#N/A	#N/A	#N/A	#N/A	#N/A	#N/A	1	19.9	1.3	7	1	0	1	0
Tb927.7.6710	hypothetical protein	ZUnknown	#N/A	#N/A	#N/A	#N/A	#N/A	#N/A	#N/A	#N/A	#N/A	#N/A	1.2	18.9	1.3	7.2	1	0	1	0
Tb927.1.2310	hypothetical protein	ZUnknown	#N/A	#N/A	#N/A	#N/A	#N/A	#N/A	#N/A	#N/A	#N/A	#N/A	1.3	27.2	1.6	10.7	1	0	1	0
Tb927.11.4620	hypothetical protein, conserved	ZUnknown	#N/A	frameshift_variant	#N/A	inframe_deletion	#N/A	inframe_deletion	#N/A	inframe_deletion	#N/A	inframe_deletion	1.9	42.1	1.7	13.7	1	0	1	0
Tb927.10.15070	hypothetical protein, conserved	ZUnknown	#N/A	inframe_deletion	#N/A	inframe_deletion	#N/A	#N/A	#N/A	#N/A	#N/A	#N/A	1.4	17.7	1.1	5.9	1	0	1	0
Tb927.2.3090	hypothetical protein, conserved	ZUnknown	#N/A	#N/A	#N/A	#N/A	#N/A	frameshift_variant	#N/A	frameshift_variant	#N/A	#N/A	1.2	30.7	1.4	9.6	1	0	1	0
Tb927.11.7000	hypothetical protein, conserved	ZUnknown	#N/A	#N/A	#N/A	#N/A	#N/A	#N/A	#N/A	frameshift_variant	#N/A	#N/A	0.9	14.7	1.1	5.6	1	0	1	0
Tb927.5.460	hypothetical protein, conserved	ZUnknown	#N/A	#N/A	#N/A	#N/A	#N/A	#N/A	#N/A	#N/A	#N/A	#N/A	0.6	11.5	0.5	4.6	1	1	1	0
Tb927.8.6430	hypothetical protein, conserved	ZUnknown	#N/A	#N/A	#N/A	#N/A	#N/A	#N/A	#N/A	#N/A	#N/A	#N/A	0.9	1.9	0.7	1.5	1	0	1	0
Tb927.8.860	hypothetical protein, conserved	ZUnknown	#N/A	#N/A	#N/A	#N/A	#N/A	#N/A	#N/A	#N/A	#N/A	#N/A	0.9	2.3	0.8	1.5	1	0	1	0
Tb927.3.5430	hypothetical protein, conserved	ZUnknown	#N/A	#N/A	#N/A	#N/A	#N/A	#N/A	#N/A	#N/A	#N/A	#N/A	0.9	1.6	0.8	1.5	1	0	1	0
Tb927.3.1480	hypothetical protein, conserved	ZUnknown	#N/A	#N/A	#N/A	#N/A	#N/A	#N/A	#N/A	#N/A	#N/A	#N/A	0.9	1.9	0.9	1.5	1	0	1	0
Tb927.9.7800	hypothetical protein, conserved	ZUnknown	#N/A	#N/A	#N/A	#N/A	#N/A	#N/A	#N/A	#N/A	#N/A	#N/A	0.8	1.5	0.9	1.5	1	0	1	0
Tb927.6.2620	hypothetical protein, conserved	ZUnknown	#N/A	#N/A	#N/A	#N/A	#N/A	#N/A	#N/A	#N/A	#N/A	#N/A	0.9	2.4	1	1.5	1	0	1	0
Tb927.11.16710	hypothetical protein, conserved	ZUnknown	#N/A	#N/A	#N/A	#N/A	#N/A	#N/A	#N/A	#N/A	#N/A	#N/A	0.8	2.4	1	1.5	1	0	1	0
Tb927.10.12590	hypothetical protein, conserved	ZUnknown	#N/A	#N/A	#N/A	#N/A	#N/A	#N/A	#N/A	#N/A	#N/A	#N/A	1	2.2	1	1.5	1	0	1	0
Tb927.10.15320	hypothetical protein, conserved	ZUnknown	#N/A	#N/A	#N/A	#N/A	#N/A	#N/A	#N/A	#N/A	#N/A	#N/A	1.1	2.1	1	1.5	1	0	1	0
Tb927.11.970	hypothetical protein, conserved	ZUnknown	#N/A	#N/A	#N/A	#N/A	#N/A	#N/A	#N/A	#N/A	#N/A	#N/A	1.1	1.7	1	1.5	1	0	1	0
Tb927.10.15230	hypothetical protein, conserved	ZUnknown	#N/A	#N/A	#N/A	#N/A	#N/A	#N/A	#N/A	#N/A	#N/A	#N/A	1	1.5	1	1.5	1	0	1	0
Tb927.2.2770	hypothetical protein, conserved	ZUnknown	#N/A	#N/A	#N/A	#N/A	#N/A	#N/A	#N/A	#N/A	#N/A	#N/A	1	4.9	1.1	1.5	1	0	1	0
Tb927.3.2970	hypothetical protein, conserved	ZUnknown	#N/A	#N/A	#N/A	#N/A	#N/A	#N/A	#N/A	#N/A	#N/A	#N/A	1.2	2.3	1.1	1.5	1	0	1	0
Tb927.11.2350	hypothetical protein, conserved	ZUnknown	#N/A	#N/A	#N/A	#N/A	#N/A	#N/A	#N/A	#N/A	#N/A	#N/A	0.9	2.2	1.1	1.5	1	0	1	0
Tb927.1.3410	hypothetical protein, conserved	ZUnknown	#N/A	#N/A	#N/A	#N/A	#N/A	#N/A	#N/A	#N/A	#N/A	#N/A	1.1	2	1.1	1.5	1	0	1	0
Tb927.9.2800	hypothetical protein, conserved	ZUnknown	#N/A	#N/A	#N/A	#N/A	#N/A	#N/A	#N/A	#N/A	#N/A	#N/A	0.9	2.7	0.8	1.6	1	0	1	0
Tb927.3.630	hypothetical protein, conserved	ZUnknown	#N/A	#N/A	#N/A	#N/A	#N/A	#N/A	#N/A	#N/A	#N/A	#N/A	0.8	1.8	0.8	1.6	1	0	1	0
Tb927.9.12390	hypothetical protein, conserved	ZUnknown	#N/A	#N/A	#N/A	#N/A	#N/A	#N/A	#N/A	#N/A	#N/A	#N/A	1	2.2	1	1.6	1	0	1	0
Tb927.3.5370	hypothetical protein, conserved	ZUnknown	#N/A	#N/A	#N/A	#N/A	#N/A	#N/A	#N/A	#N/A	#N/A	#N/A	1	2.2	1	1.6	1	0	1	0
Tb927.2.2200	hypothetical protein, conserved	ZUnknown	#N/A	#N/A	#N/A	#N/A	#N/A	#N/A	#N/A	#N/A	#N/A	#N/A	0.9	1.5	1	1.6	1	0	1	0
Tb927.10.8370	hypothetical protein, conserved	ZUnknown	#N/A	#N/A	#N/A	#N/A	#N/A	#N/A	#N/A	#N/A	#N/A	#N/A	1	2.2	1.1	1.6	1	0	1	0
Tb927.10.4970	hypothetical protein, conserved	ZUnknown	#N/A	#N/A	#N/A	#N/A	#N/A	#N/A	#N/A	#N/A	#N/A	#N/A	1	1.5	1.1	1.6	1	0	1	0
Tb927.11.4670	hypothetical protein, conserved	ZUnknown	#N/A	#N/A	#N/A	#N/A	#N/A	#N/A	#N/A	#N/A	#N/A	#N/A	0.8	2.1	0.8	1.7	1	0	1	0
Tb927.9.7250	hypothetical protein, conserved	ZUnknown	#N/A	#N/A	#N/A	#N/A	#N/A	#N/A	#N/A	#N/A	#N/A	#N/A	0.9	2	0.9	1.7	1	0	1	0
Tb927.7.6400	hypothetical protein, conserved	ZUnknown	#N/A	#N/A	#N/A	#N/A	#N/A	#N/A	#N/A	#N/A	#N/A	#N/A	1	2.3	1	1.7	1	0	1	0
Tb927.4.390	hypothetical protein, conserved	ZUnknown	#N/A	#N/A	#N/A	#N/A	#N/A	#N/A	#N/A	#N/A	#N/A	#N/A	1.2	3.3	1.1	1.7	1	0	1	0
Tb927.5.4160	hypothetical protein, conserved	ZUnknown	#N/A	#N/A	#N/A	#N/A	#N/A	#N/A	#N/A	#N/A	#N/A	#N/A	1.6	2.3	1.1	1.7	1	0	1	0
Tb927.11.10620	hypothetical protein, conserved	ZUnknown	#N/A	#N/A	#N/A	#N/A	#N/A	#N/A	#N/A	#N/A	#N/A	#N/A	1	2.3	1.1	1.7	1	0	1	0
Tb927.11.490	hypothetical protein, conserved	ZUnknown	#N/A	#N/A	#N/A	#N/A	#N/A	#N/A	#N/A	#N/A	#N/A	#N/A	1	3.9	1	1.8	1	0	1	0
Tb927.8.5150	hypothetical protein, conserved	ZUnknown	#N/A	#N/A	#N/A	#N/A	#N/A	#N/A	#N/A	#N/A	#N/A	#N/A	1	1.8	1	1.8	1	0	1	0
Tb927.3.2350	hypothetical protein, conserved	ZUnknown	#N/A	#N/A	#N/A	#N/A	#N/A	#N/A	#N/A	#N/A	#N/A	#N/A	1	1.5	1	1.8	1	0	1	0
Tb927.1.4710	hypothetical protein, conserved	ZUnknown	#N/A	#N/A	#N/A	#N/A	#N/A	#N/A	#N/A	#N/A	#N/A	#N/A	1	3	1.1	1.8	1	0	1	0
Tb927.1.1390	hypothetical protein, conserved	ZUnknown	#N/A	#N/A	#N/A	#N/A	#N/A	#N/A	#N/A	#N/A	#N/A	#N/A	0.9	3	1.1	1.8	1	0	1	0
Tb927.2.3420	hypothetical protein, conserved	ZUnknown	#N/A	#N/A	#N/A	#N/A	#N/A	#N/A	#N/A	#N/A	#N/A	#N/A	0.9	2.4	0.7	1.9	1	0	1	0
Tb927.11.14670	hypothetical protein, conserved	ZUnknown	#N/A	#N/A	#N/A	#N/A	#N/A	#N/A	#N/A	#N/A	#N/A	#N/A	0.8	2.1	0.9	1.9	1	0	1	0
Tb927.3.5690	hypothetical protein, conserved	ZUnknown	#N/A	#N/A	#N/A	#N/A	#N/A	#N/A	#N/A	#N/A	#N/A	#N/A	1	2.7	1.1	1.9	1	0	1	0
Tb927.9.12280	hypothetical protein, conserved	ZUnknown	#N/A	#N/A	#N/A	#N/A	#N/A	#N/A	#N/A	#N/A	#N/A	#N/A	1	3.6	0.9	2	1	0	1	0
Tb927.9.9100	hypothetical protein, conserved	ZUnknown	#N/A	#N/A	#N/A	#N/A	#N/A	#N/A	#N/A	#N/A	#N/A	#N/A	0.9	2.7	0.9	2	1	0	1	0
Tb927.10.2080	hypothetical protein, conserved	ZUnknown	#N/A	#N/A	#N/A	#N/A	#N/A	#N/A	#N/A	#N/A	#N/A	#N/A	1.2	2.6	1.1	2	1	0	1	0
Tb927.10.3960	hypothetical protein, conserved	ZUnknown	#N/A	#N/A	#N/A	#N/A	#N/A	#N/A	#N/A	#N/A	#N/A	#N/A	0.7	2.9	0.9	2.1	1	0	1	0
Tb927.2.2140	hypothetical protein, conserved	ZUnknown	#N/A	#N/A	#N/A	#N/A	#N/A	#N/A	#N/A	#N/A	#N/A	#N/A	1.1	3.5	1	2.1	1	0	1	0
Tb927.9.10930	hypothetical protein, conserved	ZUnknown	#N/A	#N/A	#N/A	#N/A	#N/A	#N/A	#N/A	#N/A	#N/A	#N/A	1	2.4	1	2.1	1	0	1	0
Tb927.3.5560	hypothetical protein, conserved	ZUnknown	#N/A	#N/A	#N/A	#N/A	#N/A	#N/A	#N/A	#N/A	#N/A	#N/A	1.1	3.4	1.2	2.1	1	0	1	0
Tb927.1.2640	hypothetical protein, conserved	ZUnknown	#N/A	#N/A	#N/A	#N/A	#N/A	#N/A	#N/A	#N/A	#N/A	#N/A	0.9	4.9	0.8	2.2	1	0	1	0
Tb927.10.7300	hypothetical protein, conserved	ZUnknown	#N/A	#N/A	#N/A	#N/A	#N/A	#N/A	#N/A	#N/A	#N/A	#N/A	0.8	3.4	1.1	2.3	1	0	1	0
Tb927.11.15200	hypothetical protein, conserved	ZUnknown	#N/A	#N/A	#N/A	#N/A	#N/A	#N/A	#N/A	#N/A	#N/A	#N/A	1.2	5.4	1.1	2.7	1	0	1	0
Tb927.11.13630	hypothetical protein, conserved	ZUnknown	#N/A	#N/A	#N/A	#N/A	#N/A	#N/A	#N/A	#N/A	#N/A	#N/A	1.2	5	1.3	3	1	0	1	0
Tb927.1.4440	hypothetical protein, conserved	ZUnknown	#N/A	#N/A	#N/A	#N/A	#N/A	#N/A	#N/A	#N/A	#N/A	#N/A	1	7.1	1.1	3.1	1	0	1	0
Tb927.11.10290	hypothetical protein, conserved	ZUnknown	#N/A	#N/A	#N/A	#N/A	#N/A	#N/A	#N/A	#N/A	#N/A	#N/A	1.1	9.1	1.1	3.5	1	0	1	0
Tb927.9.17670	hypothetical protein, conserved	ZUnknown	#N/A	#N/A	#N/A	#N/A	#N/A	#N/A	#N/A	#N/A	#N/A	#N/A	2.9	5.3	2.3	4.1	1	0	1	0
Tb927.9.1120	hypothetical protein, conserved	ZUnknown	#N/A	#N/A	#N/A	#N/A	#N/A	#N/A	#N/A	#N/A	#N/A	#N/A	2	3.9	1.9	4.3	1	0	1	0
Tb927.3.2450	hypothetical protein, conserved	ZUnknown	#N/A	#N/A	#N/A	#N/A	#N/A	#N/A	#N/A	#N/A	#N/A	#N/A	1.2	15.5	1.1	6	1	0	1	0
Tb927.9.4130	hypothetical protein, conserved	ZUnknown	#N/A	#N/A	#N/A	#N/A	#N/A	#N/A	#N/A	#N/A	#N/A	#N/A	1	18.5	1.1	6.3	1	0	1	0
Tb927.6.4270	hypothetical protein, conserved, NADH dehydrogenase?	ZUnknown	#N/A	#N/A	#N/A	#N/A	#N/A	#N/A	#N/A	#N/A	#N/A	#N/A	1.2	1.6	1.2	1.5	1	0	1	0
Tb927.9.7670	hypothetical protein, conserved, no clear matches	ZUnknown	#N/A	#N/A	#N/A	#N/A	#N/A	#N/A	#N/A	#N/A	#N/A	#N/A	1.1	2.2	1.1	1.7	1	0	1	0
Tb927.9.1520	hypothetical protein, conserved, no clear yeast or human matches	ZUnknown	#N/A	#N/A	#N/A	#N/A	#N/A	#N/A	#N/A	#N/A	#N/A	#N/A	0.9	2.3	1	1.9	1	0	1	0
Tb927.3.700	hypothetical protein, conserved, no clear yeast or human matches	ZUnknown	#N/A	#N/A	#N/A	#N/A	#N/A	#N/A	#N/A	#N/A	#N/A	#N/A	0.9	4.4	0.8	2.2	1	0	1	0
Tb927.8.8280	hypothetical protein, conserved, no domains, K-specific	ZUnknown	#N/A	#N/A	#N/A	#N/A	#N/A	#N/A	#N/A	#N/A	#N/A	#N/A	0.9	2.3	1.1	1.6	1	0	1	0
Tb927.3.5350	hypothetical protein, conserved, no known domains	ZUnknown	#N/A	#N/A	#N/A	#N/A	#N/A	#N/A	#N/A	#N/A	#N/A	#N/A	1	2.6	1	1.5	1	0	1	0
Tb927.8.4340	hypothetical protein, conserved, signal peptide, 4TM domains, no functional domains or BLASTp hits	ZUnknown	#N/A	#N/A	#N/A	#N/A	#N/A	#N/A	#N/A	#N/A	#N/A	#N/A	0.9	1.6	0.8	1.5	1	0	1	0
Tb927.7.2810	hypothetical protein, conserved, trypanosome-specific	ZUnknown	#N/A	#N/A	#N/A	#N/A	#N/A	#N/A	#N/A	#N/A	#N/A	#N/A	1	3.9	1	2.2	1	0	1	0
Tb927.9.1590	hypothetical protein, conserved, weakly matches human ferrochelateases because of twin Cys-X9-Cys motifs	ZUnknown	#N/A	#N/A	#N/A	#N/A	#N/A	#N/A	#N/A	#N/A	#N/A	#N/A	0.9	2	0.9	1.5	1	0	1	0
Tb927.10.12650	hypothetical protein, salivarian tryp only, 3'-UTR of 12660?	ZUnknown	#N/A	#N/A	#N/A	#N/A	#N/A	#N/A	#N/A	#N/A	#N/A	#N/A	1.5	19	1.6	6.7	1	0	1	0
Tb927.10.2360	hypothetical protein, tryp specific	ZUnknown	#N/A	#N/A	#N/A	#N/A	#N/A	#N/A	#N/A	#N/A	#N/A	#N/A	1.2	9.6	1.2	4.5	1	0	1	0
Tb927.1.1760	hypothetical transmembrane protein	ZUnknown	#N/A	#N/A	#N/A	#N/A	#N/A	#N/A	#N/A	#N/A	#N/A	#N/A	1.4	12.6	1.4	5.8	1	0	1	0
Tb927.10.2970	IF1 inhibitor of F1 ATPase	ZUnknown	#N/A	#N/A	#N/A	#N/A	#N/A	#N/A	#N/A	#N/A	#N/A	#N/A	1.1	2.4	1.1	1.5	1	0	1	0
Tb927.10.9450	invariant surface glycoprotein, putative	ZUnknown	#N/A	#N/A	#N/A	#N/A	#N/A	#N/A	#N/A	#N/A	#N/A	#N/A	1	2.4	0.9	1.5	1	0	1	0
Tb927.10.8870	Myosin-like coiled-coil protein, putative	ZUnknown	#N/A	#N/A	#N/A	#N/A	#N/A	#N/A	#N/A	#N/A	#N/A	#N/A	0.9	2.3	1	1.6	1	0	1	0
Tb927.1.1400	Overproducer of inositol protein 10 homolog, putative	ZUnknown	#N/A	#N/A	#N/A	#N/A	#N/A	#N/A	#N/A	#N/A	#N/A	#N/A	0.8	2.2	0.8	1.8	1	0	1	0
Tb927.4.780	Phosphatidylinositol N-acetylglucosaminyltransferase subunit Y, putative	ZUnknown	#N/A	#N/A	#N/A	#N/A	#N/A	#N/A	#N/A	#N/A	#N/A	#N/A	1.3	2.4	1	1.7	1	0	1	0
Tb927.9.13070	predicted heat shock factor binding protein	ZUnknown	#N/A	#N/A	#N/A	#N/A	#N/A	#N/A	#N/A	#N/A	#N/A	#N/A	1.3	2.3	1.3	1.8	1	0	1	0
Tb927.4.3710	Predicted membrane protein, putative	ZUnknown	#N/A	#N/A	#N/A	#N/A	#N/A	#N/A	#N/A	#N/A	#N/A	#N/A	1.1	1.7	1.1	1.5	1	0	1	0
Tb927.11.4260	Protein of unknown function, DUF607, putative	ZUnknown	#N/A	#N/A	#N/A	#N/A	#N/A	#N/A	#N/A	#N/A	#N/A	#N/A	0.8	1.8	0.9	1.6	1	0	1	0
Tb927.11.13610	rhodanese-like domain containing protein, putative	ZUnknown	#N/A	#N/A	#N/A	#N/A	#N/A	#N/A	#N/A	#N/A	#N/A	#N/A	1	1.7	0.9	1.6	1	0	1	0
Tb927.8.5430	Snf7, putative	ZUnknown	#N/A	#N/A	#N/A	#N/A	#N/A	#N/A	#N/A	#N/A	#N/A	#N/A	0.8	1.8	0.9	1.7	1	0	1	0
Tb927.8.2200	terbinafine resistance locus protein (yip1), putative	ZUnknown	#N/A	#N/A	#N/A	#N/A	#N/A	#N/A	#N/A	#N/A	#N/A	#N/A	1.1	2.5	1	1.7	1	0	1	0
Tb927.6.2680	transmembrane protein, putative	ZUnknown	#N/A	#N/A	#N/A	#N/A	#N/A	#N/A	#N/A	#N/A	#N/A	#N/A	1	1.7	1	1.5	1	0	1	0
Tb927.8.6900	transport protein particle (TRAPP) component, putative	ZUnknown	#N/A	#N/A	#N/A	#N/A	#N/A	#N/A	#N/A	#N/A	#N/A	#N/A	0.9	1.8	1	1.6	1	0	1	0
Tb927.6.3960	Triose-phosphate Transporter family, putative	ZUnknown	#N/A	#N/A	#N/A	#N/A	#N/A	#N/A	#N/A	#N/A	#N/A	#N/A	1.2	1.5	1.1	1.5	1	0	1	0
Tb927.4.3080	Uncharacterised ACR, YggU family COG1872, putative	ZUnknown	#N/A	#N/A	#N/A	#N/A	#N/A	#N/A	#N/A	#N/A	#N/A	#N/A	0.8	2.2	1	1.6	1	0	1	0
Tb927.2.4840	Vitamin K epoxide reductase family, putative	ZUnknown	#N/A	#N/A	#N/A	#N/A	#N/A	#N/A	#N/A	#N/A	#N/A	#N/A	0.9	2.6	1	1.6	1	0	1	0
Tb927.10.4350	hypothetical protein	ZUnknown	missense_variant	#N/A	#N/A	#N/A	#N/A	#N/A	#N/A	#N/A	#N/A	#N/A	0.6	2.1	0.8	1.9	1	0	1	1
Tb927.1.1270	homocysteine S-methyltransferase, putative	Amino.acids	#N/A	#N/A	#N/A	#N/A	#N/A	#N/A	#N/A	#N/A	#N/A	#N/A	1	1.6	1	1.1	1	0	0	0
Tb927.1.4690	arginine N-methyltransferase (PRMT1)	Arg.methylation	#N/A	#N/A	#N/A	#N/A	#N/A	#N/A	#N/A	#N/A	#N/A	#N/A	1	1.9	1	1.2	1	0	0	0
Tb927.11.13020	calmodulin	Calcium	#N/A	#N/A	#N/A	#N/A	#N/A	#N/A	#N/A	#N/A	#N/A	#N/A	1	0.5	0.8	1	0	1	0	0
Tb927.11.3680	calmodulin, putative	Calcium	#N/A	#N/A	#N/A	#N/A	#N/A	#N/A	#N/A	#N/A	#N/A	#N/A	1	1.6	1	1.4	1	0	0	0
Tb927.11.9790	calmodulin, putative	Calcium	#N/A	#N/A	#N/A	#N/A	#N/A	#N/A	#N/A	#N/A	#N/A	#N/A	1	0.9	1	1.5	1	0	0	0
Tb927.4.2260	Centrin1	Cell.cycle	#N/A	#N/A	#N/A	#N/A	#N/A	#N/A	#N/A	#N/A	#N/A	#N/A	1.1	0.5	1.1	0.8	0	1	0	0
Tb927.11.1000	kinetoplastid kinetochore protein 16	Cell.cycle	#N/A	#N/A	#N/A	#N/A	#N/A	#N/A	#N/A	#N/A	#N/A	#N/A	1	1.5	0.8	1.3	1	0	0	0
Tb927.7.2110	KKT11 Kinetochore protein	Cell.cycle	#N/A	#N/A	#N/A	#N/A	#N/A	#N/A	#N/A	#N/A	#N/A	#N/A	1	2.6	1.1	1.4	1	0	0	0
Tb927.11.10000	KKT16 Kinetochore protein	Cell.cycle	#N/A	#N/A	#N/A	#N/A	#N/A	#N/A	#N/A	#N/A	#N/A	#N/A	0.9	1.9	1	1.4	1	0	0	0
Tb927.6.1210	KKT6 kinetochore protein	Cell.cycle	#N/A	#N/A	#N/A	#N/A	#N/A	#N/A	#N/A	#N/A	#N/A	#N/A	0.9	0.5	0.9	0.8	0	1	0	0
Tb927.9.12730	chaperone protein DNAj, endoplasmatic reticulum	Chaperone	#N/A	#N/A	#N/A	#N/A	#N/A	#N/A	#N/A	#N/A	#N/A	#N/A	1.2	2.1	1.1	1.2	1	0	0	0
Tb927.11.15130	chaperone protein DNAj, putative	Chaperone	#N/A	#N/A	#N/A	#N/A	#N/A	#N/A	#N/A	#N/A	#N/A	#N/A	1	1.5	1	0.8	1	0	0	0
Tb927.10.8540	chaperone protein DNAj, putative	Chaperone	#N/A	#N/A	#N/A	#N/A	#N/A	#N/A	#N/A	#N/A	#N/A	#N/A	1	1.6	1	1.2	1	0	0	0
Tb927.8.1030	chaperone protein DNAj, putative	Chaperone	#N/A	#N/A	#N/A	#N/A	#N/A	#N/A	#N/A	#N/A	#N/A	#N/A	1.2	1.5	1.2	1.3	1	0	0	0
Tb927.10.12530	chaperone protein DNAj, putative	Chaperone	#N/A	#N/A	#N/A	#N/A	#N/A	#N/A	#N/A	#N/A	#N/A	#N/A	0.8	1.7	1	1.4	1	0	0	0
Tb927.7.6660	chaperone protein DNAj, putative	Chaperone	#N/A	#N/A	#N/A	#N/A	#N/A	#N/A	#N/A	#N/A	#N/A	#N/A	0.9	1.1	1	1.5	1	0	0	0
Tb927.5.1370	cyclophilin-type peptidyl-prolyl cis-trans isomerase, putative (PPIase)	Chaperone	#N/A	#N/A	#N/A	#N/A	#N/A	#N/A	#N/A	#N/A	#N/A	#N/A	0.9	1.8	0.7	1.1	1	0	0	0
Tb927.7.4770	cyclophilin-type peptidyl-prolyl cis-trans isomerase, putative (PPIase)	Chaperone	#N/A	#N/A	#N/A	#N/A	#N/A	#N/A	#N/A	#N/A	#N/A	#N/A	1	1.3	1	1.5	1	0	0	0
Tb927.10.15590	FKBP-type peptidyl-prolyl cis-trans isomerase, conserved	Chaperone	#N/A	#N/A	#N/A	#N/A	#N/A	#N/A	#N/A	#N/A	#N/A	#N/A	1.2	1.6	1.1	1	1	0	0	0
Tb927.7.2070	heat shock protein DNAJ, putative	Chaperone	#N/A	#N/A	#N/A	#N/A	#N/A	#N/A	#N/A	#N/A	#N/A	#N/A	1	2.4	0.9	1.2	1	0	0	0
Tb927.11.16050	HSP20 domain	Chaperone	#N/A	#N/A	#N/A	#N/A	#N/A	#N/A	#N/A	#N/A	#N/A	#N/A	0.9	1.5	0.9	1.1	1	0	0	0
Tb927.9.1560	hypothetical protein, conserved, DNAj domain	Chaperone	#N/A	#N/A	#N/A	#N/A	#N/A	#N/A	#N/A	#N/A	#N/A	#N/A	1	1.7	1	1	1	0	0	0
Tb927.3.3100	peptidyl-prolyl cis-trans isomerase NIMA-interacting 4, putative	Chaperone	#N/A	#N/A	#N/A	#N/A	#N/A	#N/A	#N/A	#N/A	#N/A	#N/A	0.8	1.6	0.8	1	1	0	0	0
Tb927.7.2480	peptidyl-prolyl cis-trans isomerase, putative (PAR45)	Chaperone	#N/A	#N/A	#N/A	#N/A	#N/A	#N/A	#N/A	#N/A	#N/A	#N/A	1.1	1.7	1	1.2	1	0	0	0
Tb927.8.690	peptidyl-prolyl cis-trans isomerase/rotamase, putative,PPIase, putative (PIN1)	Chaperone	#N/A	#N/A	#N/A	#N/A	#N/A	#N/A	#N/A	#N/A	#N/A	#N/A	0.9	1.6	1	1.4	1	0	0	0
Tb927.5.2940	stress-induced protein sti1, putative	Chaperone	#N/A	#N/A	#N/A	#N/A	#N/A	#N/A	#N/A	#N/A	#N/A	#N/A	0.9	0.8	0.6	0.5	0	1	0	0
Tb927.11.14840	CPC2, chromosomal passenger complex	Chromatin	#N/A	#N/A	#N/A	#N/A	#N/A	#N/A	#N/A	#N/A	#N/A	#N/A	0.9	2	1.1	1.3	1	0	0	0
Tb927.10.1680	histone deacetylase 1 (DAC1 or HDAC1)	Chromatin	#N/A	#N/A	#N/A	#N/A	#N/A	#N/A	#N/A	#N/A	#N/A	#N/A	1	1.5	1.2	1.4	1	0	0	0
Tb927.10.15350	histone H3 variant V (h3vaR)	Chromatin	#N/A	#N/A	#N/A	#N/A	#N/A	#N/A	#N/A	#N/A	#N/A	#N/A	1.2	3	0.9	1.2	1	0	0	0
Tb927.5.4170	histone H4	Chromatin	#N/A	#N/A	#N/A	#N/A	#N/A	#N/A	#N/A	#N/A	#N/A	#N/A	1.5	1.3	1	1.6	1	0	0	0
Tb927.5.3510	structural maintenance of chromosome 3 (SMC3)	Chromatin	#N/A	#N/A	#N/A	#N/A	#N/A	#N/A	#N/A	#N/A	#N/A	#N/A	1.5	1.2	1	1.3	1	0	0	0
Tb927.3.5310	paraflagellar rod protein,I2 antigen	Cytoskeleton	missense_variant	#N/A	missense_variant	#N/A	#N/A	#N/A	missense_variant	#N/A	#N/A	#N/A	1	1.2	0.9	1	0	0	0	1
Tb927.4.980	actin, putative	Cytoskeleton	#N/A	#N/A	#N/A	#N/A	#N/A	#N/A	#N/A	#N/A	#N/A	#N/A	1.2	1.7	1.2	1.1	1	0	0	0
Tb927.5.3280	BBP135	Cytoskeleton	#N/A	#N/A	#N/A	#N/A	#N/A	#N/A	#N/A	#N/A	#N/A	#N/A	0.9	0.6	0.7	0.5	0	1	0	0
Tb927.5.4340	BBP65	Cytoskeleton	#N/A	#N/A	#N/A	#N/A	#N/A	#N/A	#N/A	#N/A	#N/A	#N/A	1.6	1	1	0.9	1	0	0	0
Tb927.3.5180	cofilin/actin depolymerizing factor, putative	Cytoskeleton	#N/A	#N/A	#N/A	#N/A	#N/A	#N/A	#N/A	#N/A	#N/A	#N/A	0.9	1.7	0.9	1.2	1	0	0	0
Tb927.5.4440	dynein light chain, putative	Cytoskeleton	#N/A	#N/A	#N/A	#N/A	#N/A	#N/A	#N/A	#N/A	#N/A	#N/A	1.6	0.9	0.9	1	1	0	0	0
Tb927.9.12820	dynein light chain, putative,dynein Tctex2 family, putative	Cytoskeleton	#N/A	#N/A	#N/A	#N/A	#N/A	#N/A	#N/A	#N/A	#N/A	#N/A	0.9	1.5	0.9	1.1	1	0	0	0
Tb927.11.670	epsinR	Cytoskeleton	#N/A	disruptive_inframe_insertion	#N/A	disruptive_inframe_insertion	#N/A	#N/A	#N/A	#N/A	#N/A	#N/A	1.2	1.1	1.1	1.1	0	0	0	0
Tb927.6.1730	hypothetical protein, conserved, resembles various yeast myosins	Cytoskeleton	#N/A	inframe_deletion	#N/A	#N/A	#N/A	#N/A	#N/A	#N/A	#N/A	#N/A	0.9	0.9	0.9	1.1	0	0	0	0
Tb927.11.16200	microtubule-associated protein,corset-associated protein 17 (CAP17)	Cytoskeleton	#N/A	#N/A	#N/A	#N/A	#N/A	#N/A	#N/A	#N/A	#N/A	#N/A	0.9	2.1	0.8	1.1	1	0	0	0
Tb927.7.4290	Nuclear migration protein NudC (animals), 46% identity	Cytoskeleton	#N/A	#N/A	#N/A	#N/A	#N/A	#N/A	#N/A	#N/A	#N/A	#N/A	1.1	1.7	1	1.2	1	0	0	0
Tb927.6.4140	paraflagellar rod protein PFC4	Cytoskeleton	#N/A	#N/A	#N/A	#N/A	#N/A	#N/A	#N/A	#N/A	#N/A	#N/A	1	0.9	0.8	1.5	1	0	0	0
Tb927.3.3750	paraflagellar rod protein PFC7	Cytoskeleton	#N/A	#N/A	#N/A	#N/A	#N/A	#N/A	#N/A	#N/A	#N/A	#N/A	1.1	1.9	1.4	1.3	1	0	0	0
Tb927.3.2890	radial spoke protein RSP10, putative	Cytoskeleton	#N/A	#N/A	#N/A	#N/A	#N/A	#N/A	#N/A	#N/A	#N/A	#N/A	0.9	1.9	1	1.1	1	0	0	0
Tb927.5.2850	radial spoke protein RSP2, putative	Cytoskeleton	#N/A	#N/A	#N/A	#N/A	#N/A	#N/A	#N/A	#N/A	#N/A	#N/A	1	1	0.7	0.5	0	1	0	0
Tb927.8.810	radial spoke protein RSP9, putative	Cytoskeleton	#N/A	#N/A	#N/A	#N/A	#N/A	#N/A	#N/A	#N/A	#N/A	#N/A	1	1.8	1.1	0.9	1	0	0	0
Tb927.9.10370	TAX-1, flagellar protein	Cytoskeleton	#N/A	#N/A	#N/A	#N/A	#N/A	#N/A	#N/A	#N/A	#N/A	#N/A	0.9	1.7	0.9	1.2	1	0	0	0
Tb927.11.13230	TbVAP, flagellar attachment zone	Cytoskeleton	#N/A	#N/A	#N/A	#N/A	#N/A	#N/A	#N/A	#N/A	#N/A	#N/A	1.1	1.8	1.2	1	1	0	0	0
Tb927.5.3860	tubulin tyrosine ligase, putative	Cytoskeleton	#N/A	#N/A	#N/A	#N/A	#N/A	#N/A	#N/A	#N/A	#N/A	#N/A	1.6	1	1	1.2	1	0	0	0
Tb927.4.1330	DNA topoisomerase IB, large subunit	DNA	#N/A	#N/A	#N/A	#N/A	#N/A	#N/A	#N/A	#N/A	#N/A	#N/A	0.9	1.9	0.9	1.4	1	0	0	0
Tb927.4.4680	GINS complex subunit PSF3, replication initiation	DNA	#N/A	#N/A	#N/A	#N/A	#N/A	#N/A	#N/A	#N/A	#N/A	#N/A	1	1.7	1	1.4	1	0	0	0
Tb927.5.4070	PPL1 priming DNA polymerase	DNA	#N/A	#N/A	#N/A	#N/A	#N/A	#N/A	#N/A	#N/A	#N/A	#N/A	1.5	0.9	1	0.8	1	0	0	0
Tb927.9.11870	zinc finger protein, putative,predicted zinc finger protein, MIZ	DNA	#N/A	#N/A	#N/A	#N/A	#N/A	#N/A	#N/A	#N/A	#N/A	#N/A	0.9	1.6	1	1.3	1	0	0	0
Tb927.5.4460	major vault protein, putative (MVP)	Enzyme	missense_variant	#N/A	missense_variant	#N/A	#N/A	#N/A	missense_variant	#N/A	#N/A	#N/A	1.5	1.1	1.1	1.1	1	0	0	1
Tb927.9.10580	3-demethylubiquinone-9 3-methyltransferase, putative	Enzyme	#N/A	#N/A	#N/A	#N/A	#N/A	#N/A	#N/A	#N/A	#N/A	#N/A	1	1.6	1	1	1	0	0	0
Tb927.2.5060	GTP binding protein, putative	Enzyme	#N/A	#N/A	#N/A	#N/A	#N/A	#N/A	#N/A	#N/A	#N/A	#N/A	0.9	1.2	1	1.5	1	0	0	0
Tb927.7.580	GTP-binding protein, putative	Enzyme	#N/A	#N/A	#N/A	#N/A	#N/A	#N/A	#N/A	#N/A	#N/A	#N/A	0.9	1.5	1	1.2	1	0	0	0
Tb927.5.4310	GTP-binding protein, putative	Enzyme	#N/A	#N/A	#N/A	#N/A	#N/A	#N/A	#N/A	#N/A	#N/A	#N/A	1.6	1.3	1	1.2	1	0	0	0
Tb927.5.2370	hydrolase, alpha/beta fold family, putative	Enzyme	#N/A	#N/A	#N/A	#N/A	#N/A	#N/A	#N/A	#N/A	#N/A	#N/A	0.9	0.9	0.7	0.5	0	1	0	0
Tb927.5.1460	Mo/Co carrier or lysine decarboxylase	Enzyme	#N/A	#N/A	#N/A	#N/A	#N/A	#N/A	#N/A	#N/A	#N/A	#N/A	1	0.9	0.7	0.5	0	1	0	0
Tb927.5.4350	NUDIX hydrolase, putative	Enzyme	#N/A	#N/A	#N/A	#N/A	#N/A	#N/A	#N/A	#N/A	#N/A	#N/A	1.5	1.9	1	1.3	1	0	0	0
Tb927.8.3740	pterin 4 alpha carbinolamine dehydratase, putative	Enzyme	#N/A	#N/A	#N/A	#N/A	#N/A	#N/A	#N/A	#N/A	#N/A	#N/A	0.9	1.5	0.9	1	1	0	0	0
Tb927.9.12410	riboflavin kinase, putative	Enzyme	#N/A	#N/A	#N/A	#N/A	#N/A	#N/A	#N/A	#N/A	#N/A	#N/A	0.9	1.5	0.9	1	1	0	0	0
Tb927.7.310	Thioredoxin domain, also matches human prostaglandin E synthetase	Enzyme	#N/A	#N/A	#N/A	#N/A	#N/A	#N/A	#N/A	#N/A	#N/A	#N/A	1.1	1.5	1.1	1.3	1	0	0	0
Tb927.9.7340	ESAG9, putative	ESAG	missense_variant	#N/A	#N/A	#N/A	#N/A	#N/A	missense_variant	#N/A	#N/A	#N/A	1	1.1	1	0.9	0	0	0	1
Tb927.4.3280	ESAG2, putative	ESAG	#N/A	#N/A	#N/A	#N/A	#N/A	#N/A	#N/A	#N/A	#N/A	#N/A	0.9	1.8	1	1.4	1	0	0	0
Tb927.2.2020	ESAG3, putative	ESAG	#N/A	#N/A	#N/A	#N/A	#N/A	#N/A	#N/A	#N/A	#N/A	#N/A	0.9	1.5	1.1	1.3	1	0	0	0
Tb927.10.4370	ESAG3, putative	ESAG	#N/A	#N/A	#N/A	#N/A	#N/A	#N/A	#N/A	#N/A	#N/A	#N/A	1.2	2	1	1.4	1	0	0	0
Tb927.10.9500	ESAG3, putative	ESAG	#N/A	#N/A	#N/A	#N/A	#N/A	#N/A	#N/A	#N/A	#N/A	#N/A	1	1.9	1.1	1.4	1	0	0	0
Tb927.5.4620	ESAG9, putative	ESAG	#N/A	#N/A	#N/A	#N/A	#N/A	#N/A	#N/A	#N/A	#N/A	#N/A	1.4	1.8	1	1.1	1	0	0	0
Tb927.9.7420	ESAG9, putative	ESAG	#N/A	#N/A	#N/A	#N/A	#N/A	#N/A	#N/A	#N/A	#N/A	#N/A	0	0	0	1	0	1	0	0
Tb927.9.12550	glycerol kinase, glycosomal (glk1)	Glucose.glycerol	missense_variant	#N/A	missense_variant	#N/A	#N/A	#N/A	missense_variant	#N/A	#N/A	#N/A	1.1	0.9	1	0.9	0	0	0	1
Tb927.10.2020	hexokinase (HK2)	Glucose.glycerol	#N/A	#N/A	#N/A	#N/A	#N/A	#N/A	#N/A	#N/A	#N/A	#N/A	1	0.5	1.1	0.7	0	1	0	0
Tb927.11.5350	myo-inositol/proton symporter (MIT)	Glucose.glycerol	#N/A	#N/A	#N/A	#N/A	#N/A	#N/A	#N/A	#N/A	#N/A	#N/A	0.8	1.7	0.9	1	1	0	0	0
Tb927.11.16560	CMP-sialic acid transporter, putative	Glycans	#N/A	#N/A	#N/A	#N/A	#N/A	#N/A	#N/A	#N/A	#N/A	#N/A	1	1.6	0.9	1.2	1	0	0	0
Tb927.9.12790	dolichol kinase, putative	Glycans	#N/A	#N/A	#N/A	#N/A	#N/A	#N/A	#N/A	#N/A	#N/A	#N/A	0.9	1.6	1	1.2	1	0	0	0
Tb927.10.6530	dolichyl-P-Man:GDP-Man5GlcNAc2-PP-dolichyl alpha-1,3-mannosyltransferase, putative	Glycans	#N/A	#N/A	#N/A	#N/A	#N/A	#N/A	#N/A	#N/A	#N/A	#N/A	0.9	1.5	1	1.3	1	0	0	0
Tb927.2.4720	dolichyl-P-Man:GDP-Man7GlcNAc2-PP-dolichyl alpha-1,6-mannosyltransferase, putative	Glycans	#N/A	#N/A	#N/A	#N/A	#N/A	#N/A	#N/A	#N/A	#N/A	#N/A	1	1.8	1	1.4	1	0	0	0
Tb927.7.300	N-acetylglucosaminyltransferase II GT15	Glycans	#N/A	#N/A	#N/A	#N/A	#N/A	#N/A	#N/A	#N/A	#N/A	#N/A	1	1.3	0.9	1.5	1	0	0	0
Tb927.2.3370	UDP-Gal glycosyltransferase GT3	Glycans	#N/A	#N/A	#N/A	#N/A	#N/A	#N/A	#N/A	#N/A	#N/A	#N/A	1	1.6	1	1.2	1	0	0	0
Tb927.2.1780	UDP-GlcNAc:PI a1-6 GlcNAc-transferase	Glycans	#N/A	#N/A	#N/A	#N/A	#N/A	#N/A	#N/A	#N/A	#N/A	#N/A	0.9	1.7	1	1.3	1	0	0	0
Tb927.10.14720	PEX13 peroxin 13	Glycosome	#N/A	#N/A	#N/A	#N/A	#N/A	#N/A	#N/A	#N/A	#N/A	#N/A	0.9	1.6	1	1.2	1	0	0	0
Tb927.3.3610	PEX7 peroxisomal targeting signal type 2 receptor	Glycosome	#N/A	#N/A	#N/A	#N/A	#N/A	#N/A	#N/A	#N/A	#N/A	#N/A	1.1	1.5	1.1	0.9	1	0	0	0
Tb927.2.6000	GPI phospholipase C	GPI.anchors	#N/A	#N/A	#N/A	#N/A	#N/A	#N/A	#N/A	#N/A	#N/A	#N/A	0.9	1.5	0.8	1	1	0	0	0
Tb927.10.6140	GPI-GlcNAc transferase	GPI.anchors	#N/A	#N/A	#N/A	#N/A	#N/A	#N/A	#N/A	#N/A	#N/A	#N/A	1	1.5	1	1.1	1	0	0	0
Tb927.11.12080	N-acetyl-D-glucosaminylphosphatidylinositol de-N-acetylase (GPI12)	GPI.anchors	#N/A	#N/A	#N/A	#N/A	#N/A	#N/A	#N/A	#N/A	#N/A	#N/A	0.9	1.9	1	1.3	1	0	0	0
Tb927.5.4540	GRESAG 4, putative receptor-type adenylate cyclase	GRESAG	#N/A	#N/A	#N/A	#N/A	#N/A	#N/A	#N/A	#N/A	#N/A	#N/A	1.6	1.2	1.1	1	1	0	0	0
Tb927.6.1520	Aquaglyceroporin 1	Ions	#N/A	#N/A	#N/A	#N/A	#N/A	#N/A	#N/A	#N/A	#N/A	#N/A	1	1.8	1	1.1	1	0	0	0
Tb927.5.3400	calcium-translocating P-type ATPase, calcium pump	Ions	#N/A	#N/A	#N/A	#N/A	#N/A	#N/A	#N/A	#N/A	#N/A	#N/A	1.6	0.9	1	1	1	0	0	0
Tb927.11.15150	1-acyl-sn-glycerol-3-phosphate acyltransferase, putative	Lipids	#N/A	#N/A	#N/A	#N/A	#N/A	#N/A	#N/A	#N/A	#N/A	#N/A	0.9	2.2	0.9	1.2	1	0	0	0
Tb927.10.4040	3-Ketosphinganine reductase	Lipids	#N/A	#N/A	#N/A	#N/A	#N/A	#N/A	#N/A	#N/A	#N/A	#N/A	1	1.5	1	1.2	1	0	0	0
Tb927.3.2030	acylphosphatase, putative	Lipids	#N/A	#N/A	#N/A	#N/A	#N/A	#N/A	#N/A	#N/A	#N/A	#N/A	1	1.6	1.2	1.3	1	0	0	0
Tb927.8.5140	DAG kinase	Lipids	#N/A	#N/A	#N/A	#N/A	#N/A	#N/A	#N/A	#N/A	#N/A	#N/A	0.9	1.5	0.9	1.2	1	0	0	0
Tb927.9.7740	lipid-like atypical dual specificity phosphatase, putative	Lipids	#N/A	#N/A	#N/A	#N/A	#N/A	#N/A	#N/A	#N/A	#N/A	#N/A	1.1	1.5	1	1.1	1	0	0	0
Tb927.8.8020	monoglyceride lipase, putative	Lipids	#N/A	#N/A	#N/A	#N/A	#N/A	#N/A	#N/A	#N/A	#N/A	#N/A	0.9	1.7	0.9	1.1	1	0	0	0
Tb927.8.3400	palmitoyl acyltransferase 12, putative	Lipids	#N/A	#N/A	#N/A	#N/A	#N/A	#N/A	#N/A	#N/A	#N/A	#N/A	0.9	1.9	1	1.1	1	0	0	0
Tb927.7.3760	phosphatidylserine synthase, putative	Lipids	#N/A	#N/A	#N/A	#N/A	#N/A	#N/A	#N/A	#N/A	#N/A	#N/A	1	1.5	0.9	1.4	1	0	0	0
Tb927.1.4830	Phospholipase A1	Lipids	#N/A	#N/A	#N/A	#N/A	#N/A	#N/A	#N/A	#N/A	#N/A	#N/A	1	2.1	0.9	1.3	1	0	0	0
Tb927.1.3320	leucine-rich repeat protein (LRRP)	LRRP	#N/A	#N/A	#N/A	#N/A	#N/A	#N/A	#N/A	#N/A	#N/A	#N/A	1	1.5	1	1.4	1	0	0	0
Tb927.8.2310	(H )-ATPase G subunit, putative	Lysosome	#N/A	#N/A	#N/A	#N/A	#N/A	#N/A	#N/A	#N/A	#N/A	#N/A	1.3	2.3	1.2	1.2	1	0	0	0
Tb927.4.1080	V-type ATPase, A subunit, putative	Lysosome	#N/A	#N/A	#N/A	#N/A	#N/A	#N/A	#N/A	#N/A	#N/A	#N/A	1.1	1.7	1.1	0.8	1	0	0	0
Tb927.3.5530	Tb-292 membrane associated protein	Membrane.protein	#N/A	#N/A	#N/A	#N/A	#N/A	#N/A	missense_variant	#N/A	#N/A	#N/A	1	0.9	1	1.1	0	0	0	1
Tb927.10.990	hypothetical protein, conserved, predicted GPI anchor	Membrane.protein	#N/A	#N/A	#N/A	#N/A	#N/A	#N/A	#N/A	#N/A	#N/A	#N/A	0.9	2.2	0.9	1.1	1	0	0	0
Tb927.11.12270	hypothetical protein, conserved,drug resistence protein, putative	Membrane.protein	#N/A	#N/A	#N/A	#N/A	#N/A	#N/A	#N/A	#N/A	#N/A	#N/A	0.9	1.6	1.1	1.3	1	0	0	0
Tb927.10.4590	mitochondrial inner membrane signal peptidase, putative	Mito.biogenesis	#N/A	#N/A	#N/A	#N/A	#N/A	#N/A	#N/A	#N/A	#N/A	#N/A	0.9	0.5	0.9	0.9	0	1	0	0
Tb927.11.13290	TIM17	Mito.biogenesis	#N/A	#N/A	#N/A	#N/A	#N/A	#N/A	#N/A	#N/A	#N/A	#N/A	0.8	2.2	0.9	1.3	1	0	0	0
Tb927.9.11220	TIM42	Mito.biogenesis	#N/A	#N/A	#N/A	#N/A	#N/A	#N/A	#N/A	#N/A	#N/A	#N/A	1.1	1.3	1.1	1.5	1	0	0	0
Tb927.10.8950	kinetoplast DNA-associated protein, putative	Mito.DNA	#N/A	#N/A	#N/A	#N/A	#N/A	#N/A	#N/A	#N/A	#N/A	#N/A	1	1.8	1.1	1.2	1	0	0	0
Tb927.1.3820	ATP synthase subunit, putative	Mito.e.transport	#N/A	#N/A	#N/A	#N/A	#N/A	#N/A	#N/A	#N/A	#N/A	#N/A	1.2	1.1	1.3	1.5	1	0	0	0
Tb927.5.1060	Complex III beta-MMP subunit of cytochrom b/c1 complex	Mito.e.transport	#N/A	#N/A	#N/A	#N/A	#N/A	#N/A	#N/A	#N/A	#N/A	#N/A	1.1	0.9	0.7	0.5	0	1	0	0
Tb927.11.6640	cytochrome b5, putative (CYB5)	Mito.e.transport	#N/A	#N/A	#N/A	#N/A	#N/A	#N/A	#N/A	#N/A	#N/A	#N/A	1	1.1	1	1.5	1	0	0	0
Tb927.4.830	cytochrome c oxidase assembly protein PET191, putative	Mito.e.transport	#N/A	#N/A	#N/A	#N/A	#N/A	#N/A	#N/A	#N/A	#N/A	#N/A	1.2	1.4	1.2	1.7	1	0	0	0
Tb927.3.2650	cytochrome c oxidase copper chaperone, putative	Mito.e.transport	#N/A	#N/A	#N/A	#N/A	#N/A	#N/A	#N/A	#N/A	#N/A	#N/A	1.1	1.2	1.1	1.7	1	0	0	0
Tb927.4.1670	POMP29, cytochrome b5-like haem-binding domain	Mito.e.transport	#N/A	#N/A	#N/A	#N/A	#N/A	#N/A	#N/A	#N/A	#N/A	#N/A	0.9	1.8	1	1.3	1	0	0	0
Tb927.2.4700	SDH8 succinate dehydrogenase (complex II) subunit	Mito.e.transport	#N/A	#N/A	#N/A	#N/A	#N/A	#N/A	#N/A	#N/A	#N/A	#N/A	1.1	2.3	1.1	1.3	1	0	0	0
Tb927.7.3520	MPC2 mitochondrial pyruvate carrier	Mito.membrane	#N/A	#N/A	#N/A	#N/A	#N/A	#N/A	#N/A	#N/A	#N/A	#N/A	0.7	1.6	0.9	1.1	1	0	0	0
Tb927.1.3800	POMP18	Mito.membrane	#N/A	#N/A	#N/A	#N/A	#N/A	#N/A	#N/A	#N/A	#N/A	#N/A	1	1.5	1	1.4	1	0	0	0
Tb927.9.10560	POMP6/TbLOK1	Mito.membrane	#N/A	#N/A	#N/A	#N/A	#N/A	#N/A	#N/A	#N/A	#N/A	#N/A	0.8	1.8	0.9	1.2	1	0	0	0
Tb927.4.2580	hypothetical protein, conserved	Mito.pathway	#N/A	#N/A	missense_variant	#N/A	#N/A	#N/A	missense_variant	#N/A	#N/A	#N/A	0.9	0.8	1	0.9	0	0	0	1
Tb927.11.9150	hypothetical protein, conserved	Mito.pathway	#N/A	#N/A	#N/A	#N/A	#N/A	frameshift_variant	#N/A	#N/A	#N/A	#N/A	1	0.9	1.1	1.1	0	0	0	0
Tb927.8.1770	hypothetical protein, conserved	Mito.pathway	#N/A	#N/A	#N/A	#N/A	#N/A	#N/A	#N/A	#N/A	#N/A	#N/A	1	1.8	1	1.1	1	0	0	0
Tb927.3.2370	hypothetical protein, conserved	Mito.pathway	#N/A	#N/A	#N/A	#N/A	#N/A	#N/A	#N/A	#N/A	#N/A	#N/A	0.9	1.5	0.9	1.2	1	0	0	0
Tb927.8.6800	hypothetical protein, conserved	Mito.pathway	#N/A	#N/A	#N/A	#N/A	#N/A	#N/A	#N/A	#N/A	#N/A	#N/A	1	1.7	1.1	1.2	1	0	0	0
Tb927.3.1730	hypothetical protein, conserved	Mito.pathway	#N/A	#N/A	#N/A	#N/A	#N/A	#N/A	#N/A	#N/A	#N/A	#N/A	0.8	2	0.9	1.3	1	0	0	0
Tb927.6.3360	hypothetical protein, conserved	Mito.pathway	#N/A	#N/A	#N/A	#N/A	#N/A	#N/A	#N/A	#N/A	#N/A	#N/A	0.9	1.5	0.9	1.3	1	0	0	0
Tb927.7.2390	hypothetical protein, conserved	Mito.pathway	#N/A	#N/A	#N/A	#N/A	#N/A	#N/A	#N/A	#N/A	#N/A	#N/A	1	1.9	1	1.3	1	0	0	0
Tb927.3.2670	hypothetical protein, conserved	Mito.pathway	#N/A	#N/A	#N/A	#N/A	#N/A	#N/A	#N/A	#N/A	#N/A	#N/A	0.9	1.9	1	1.3	1	0	0	0
Tb927.10.4550	hypothetical protein, conserved	Mito.pathway	#N/A	#N/A	#N/A	#N/A	#N/A	#N/A	#N/A	#N/A	#N/A	#N/A	1.1	1.7	1	1.3	1	0	0	0
Tb927.2.2940	hypothetical protein, conserved	Mito.pathway	#N/A	#N/A	#N/A	#N/A	#N/A	#N/A	#N/A	#N/A	#N/A	#N/A	0.9	1.7	1	1.3	1	0	0	0
Tb927.6.590	hypothetical protein, conserved	Mito.pathway	#N/A	#N/A	#N/A	#N/A	#N/A	#N/A	#N/A	#N/A	#N/A	#N/A	1.1	1.7	1.3	1.3	1	0	0	0
Tb927.9.6620	hypothetical protein, conserved	Mito.pathway	#N/A	#N/A	#N/A	#N/A	#N/A	#N/A	#N/A	#N/A	#N/A	#N/A	1.1	1.5	1	1.4	1	0	0	0
Tb927.6.4070	hypothetical protein, conserved	Mito.pathway	#N/A	#N/A	#N/A	#N/A	#N/A	#N/A	#N/A	#N/A	#N/A	#N/A	1	1.3	0.9	1.5	1	0	0	0
Tb927.9.6910	hypothetical protein, conserved	Mito.pathway	#N/A	#N/A	#N/A	#N/A	#N/A	#N/A	#N/A	#N/A	#N/A	#N/A	1	1.1	1	1.5	1	0	0	0
Tb927.11.1950	hypothetical protein, conserved	Mito.pathway	#N/A	#N/A	#N/A	#N/A	#N/A	#N/A	#N/A	#N/A	#N/A	#N/A	1	1.1	1	1.5	1	0	0	0
Tb927.3.3680	hypothetical protein, conserved	Mito.pathway	#N/A	#N/A	#N/A	#N/A	#N/A	#N/A	#N/A	#N/A	#N/A	#N/A	1	1.4	1.2	1.6	1	0	0	0
Tb927.5.2810	hypothetical protein, conserved	Mito.pathway	#N/A	#N/A	#N/A	#N/A	#N/A	#N/A	#N/A	#N/A	#N/A	#N/A	0.9	1.1	0.5	0.7	0	1	0	0
Tb927.5.3300	hypothetical protein, conserved	Mito.pathway	#N/A	#N/A	#N/A	#N/A	#N/A	#N/A	#N/A	#N/A	#N/A	#N/A	0.8	0.6	0.5	0.7	0	1	0	0
Tb927.10.6200	hypothetical protein, conserved, no clear yeast or human matches	Mito.pathway	#N/A	#N/A	#N/A	#N/A	#N/A	#N/A	#N/A	#N/A	#N/A	#N/A	1	1.7	1.1	1.2	1	0	0	0
Tb927.5.3350	iron superoxide dismutase, putative	Mito.pathway	#N/A	#N/A	#N/A	#N/A	#N/A	#N/A	#N/A	#N/A	#N/A	#N/A	1.6	1	1.1	1.1	1	0	0	0
Tb927.10.12000	iron-sulfur cluster assembly protein, ISD11, needed foraconitatase, fumarase & thiolation of mitochodrial and cytosolic tRNA	Mito.pathway	#N/A	#N/A	#N/A	#N/A	#N/A	#N/A	#N/A	#N/A	#N/A	#N/A	0.9	1.5	1	1.1	1	0	0	0
Tb927.11.9390	lipoate-protein ligase, putative,lipoyltransferase, putative	Mito.pathway	#N/A	#N/A	#N/A	#N/A	#N/A	#N/A	#N/A	#N/A	#N/A	#N/A	1.1	1.6	1.3	1.2	1	0	0	0
Tb927.5.3090	Mitochondrial ATP synthase subunit, putative	Mito.pathway	#N/A	#N/A	#N/A	#N/A	#N/A	#N/A	#N/A	#N/A	#N/A	#N/A	0.9	0.9	0.5	0.7	0	1	0	0
Tb927.7.7080	mitochondrial glycoprotein-like protein	Mito.pathway	#N/A	#N/A	#N/A	#N/A	#N/A	#N/A	#N/A	#N/A	#N/A	#N/A	1.1	1.8	1.1	1	1	0	0	0
Tb927.6.2420	p22 protein precursor, interacts with UBP1 in T. cruzi	Mito.pathway	#N/A	#N/A	#N/A	#N/A	#N/A	#N/A	#N/A	#N/A	#N/A	#N/A	0.9	1.6	0.9	1.2	1	0	0	0
Tb927.8.6560	SpoU rRNA Methylase family, putative	Mito.pathway	#N/A	#N/A	#N/A	#N/A	#N/A	#N/A	#N/A	#N/A	#N/A	#N/A	1	1.1	1	1.5	1	0	0	0
Tb927.1.840	transmembrane protein, putative	Mito.pathway	#N/A	#N/A	#N/A	#N/A	#N/A	#N/A	#N/A	#N/A	#N/A	#N/A	0.9	1.6	0.9	1.2	1	0	0	0
Tb927.1.790	hypothetical transmembrane protein, conserved	Mito.pathway	#N/A	#N/A	missense_variant	#N/A	#N/A	#N/A	#N/A	#N/A	#N/A	#N/A	1	1	1.1	0.9	0	0	0	1
Tb927.4.4150	mitochondrial RNA binding complex 1 subunit (MRB4150)	Mito.RNA	#N/A	#N/A	missense_variant	#N/A	#N/A	#N/A	missense_variant	#N/A	#N/A	#N/A	1	0.9	1	1	0	0	0	1
Tb927.10.5110	KREPA4	Mito.RNA	#N/A	#N/A	#N/A	#N/A	#N/A	#N/A	#N/A	#N/A	#N/A	#N/A	1	1.9	1.1	1.4	1	0	0	0
Tb927.3.3990	KREPB6	Mito.RNA	#N/A	#N/A	#N/A	#N/A	#N/A	#N/A	#N/A	#N/A	#N/A	#N/A	0.9	1.6	0.8	1.1	1	0	0	0
Tb927.3.1820	mitochondrial RNA binding complex 1 subunit (MRB1820)	Mito.RNA	#N/A	#N/A	#N/A	#N/A	#N/A	#N/A	#N/A	#N/A	#N/A	#N/A	0.9	2.3	1.3	1.4	1	0	0	0
Tb927.10.10830	RGG2, MRB complex component	Mito.RNA	#N/A	#N/A	#N/A	#N/A	#N/A	#N/A	#N/A	#N/A	#N/A	#N/A	1	1.8	1.3	1.3	1	0	0	0
Tb927.5.1710	ribonucleoprotein p18, mitochondrial precursor, putative	Mito.RNA	#N/A	#N/A	#N/A	#N/A	#N/A	#N/A	#N/A	#N/A	#N/A	#N/A	0.9	1.8	0.6	0.8	1	0	0	0
Tb927.10.5320	RNA editing endoribonuclease (KREN3)	Mito.RNA	#N/A	#N/A	#N/A	#N/A	#N/A	#N/A	#N/A	#N/A	#N/A	#N/A	1.2	1.5	1.1	1	1	0	0	0
Tb927.6.2230	TbRGG1	Mito.RNA	#N/A	inframe_insertion	#N/A	inframe_insertion	#N/A	#N/A	#N/A	inframe_insertion	#N/A	#N/A	1.1	0.9	1.2	0.9	0	0	0	0
Tb927.11.3640	Mitchondrial LSU ribosomal protein	Mito.translation	#N/A	#N/A	#N/A	#N/A	#N/A	#N/A	#N/A	#N/A	#N/A	#N/A	0.9	1.5	0.9	1.1	1	0	0	0
Tb927.5.4120	Mitchondrial LSU ribosomal protein	Mito.translation	#N/A	#N/A	#N/A	#N/A	#N/A	#N/A	#N/A	#N/A	#N/A	#N/A	1.6	1.2	1	1.1	1	0	0	0
Tb927.5.3870	Mitchondrial LSU ribosomal protein	Mito.translation	#N/A	#N/A	#N/A	#N/A	#N/A	#N/A	#N/A	#N/A	#N/A	#N/A	1.5	1	1	1.1	1	0	0	0
Tb927.8.1880	Mitchondrial LSU ribosomal protein	Mito.translation	#N/A	#N/A	#N/A	#N/A	#N/A	#N/A	#N/A	#N/A	#N/A	#N/A	0.9	1.5	0.9	1.2	1	0	0	0
Tb927.11.870	Mitchondrial LSU ribosomal protein	Mito.translation	#N/A	#N/A	#N/A	#N/A	#N/A	#N/A	#N/A	#N/A	#N/A	#N/A	0.9	1.8	0.9	1.3	1	0	0	0
Tb927.3.820	Mitchondrial LSU ribosomal protein	Mito.translation	#N/A	#N/A	#N/A	#N/A	#N/A	#N/A	#N/A	#N/A	#N/A	#N/A	1	1.3	1.1	1.5	1	0	0	0
Tb927.7.4550	Mitchondrial LSU ribosomal protein	Mito.translation	#N/A	#N/A	#N/A	#N/A	#N/A	#N/A	#N/A	#N/A	#N/A	#N/A	0.9	1.3	1.1	1.6	1	0	0	0
Tb927.4.1070	Mitchondrial LSU ribosomal protein L13, putative	Mito.translation	#N/A	#N/A	#N/A	#N/A	#N/A	#N/A	#N/A	#N/A	#N/A	#N/A	1.2	1.7	1.1	1.4	1	0	0	0
Tb927.5.4040	Mitchondrial SSU ribosomal associated (coiled coil)	Mito.translation	#N/A	#N/A	#N/A	#N/A	#N/A	#N/A	#N/A	#N/A	#N/A	#N/A	1.5	1	1.1	1.1	1	0	0	0
Tb927.3.770	Mitchondrial SSU ribosomal protein	Mito.translation	#N/A	#N/A	#N/A	#N/A	#N/A	#N/A	#N/A	#N/A	#N/A	#N/A	1.1	1.5	1.1	1.1	1	0	0	0
Tb927.6.4580	Mitchondrial SSU ribosomal protein	Mito.translation	#N/A	#N/A	#N/A	#N/A	#N/A	#N/A	#N/A	#N/A	#N/A	#N/A	1.2	1.4	1	1.5	1	0	0	0
Tb927.9.10310	mitochondrial carrier protein, MCP11	Mito.transport	#N/A	#N/A	#N/A	#N/A	#N/A	#N/A	#N/A	#N/A	#N/A	#N/A	0.8	2	1	1.4	1	0	0	0
Tb927.3.2980	mitochondrial carrier protein, MCP17	Mito.transport	#N/A	#N/A	#N/A	#N/A	#N/A	#N/A	#N/A	#N/A	#N/A	#N/A	0.9	1.5	1.1	1.2	1	0	0	0
Tb927.8.4280	nuclear transport factor 2, putative	Nuclear.transport	#N/A	#N/A	#N/A	#N/A	#N/A	#N/A	#N/A	#N/A	#N/A	#N/A	0.9	2.2	1	1.4	1	0	0	0
Tb927.3.1120	Ran or RTB2	Nuclear.transport	#N/A	#N/A	#N/A	#N/A	#N/A	#N/A	#N/A	#N/A	#N/A	#N/A	0.9	1.5	0.9	0.9	1	0	0	0
Tb927.11.3380	RanBP1 Ran-binding protein 1	Nuclear.transport	#N/A	#N/A	#N/A	#N/A	#N/A	#N/A	#N/A	#N/A	#N/A	#N/A	1	1.5	1.1	1.2	1	0	0	0
Tb927.10.14180	TbSec13 Outer ring nucleoporin	Nuclear.transport	#N/A	#N/A	#N/A	#N/A	#N/A	#N/A	#N/A	#N/A	#N/A	#N/A	1.1	1.6	1.2	1.1	1	0	0	0
Tb927.6.2300	adenosine kinase, putative	Nucleotides	#N/A	#N/A	#N/A	#N/A	#N/A	#N/A	missense_variant	#N/A	#N/A	#N/A	1	0.7	0.9	0.9	0	0	0	1
Tb927.10.2540	adenylate kinase, putative (ADKC)	Nucleotides	#N/A	#N/A	#N/A	#N/A	#N/A	#N/A	#N/A	#N/A	#N/A	#N/A	0.9	0.5	1.1	0.8	0	1	0	0
Tb927.5.3970	adenylate kinase, putative (ADKE)	Nucleotides	#N/A	#N/A	#N/A	#N/A	#N/A	#N/A	#N/A	#N/A	#N/A	#N/A	1.5	1.2	1	1	1	0	0	0
Tb927.5.1360	nucleoside 2-deoxyribosyltransferase (NDRT)	Nucleotides	#N/A	#N/A	#N/A	#N/A	#N/A	#N/A	#N/A	#N/A	#N/A	#N/A	0.9	1.6	0.7	0.7	1	0	0	0
Tb927.5.3810	orotidine-5-phosphate decarboxylase/orotate phosphoribosyltransferase, OMPDCase-OPRTase	Nucleotides	#N/A	#N/A	#N/A	#N/A	#N/A	#N/A	#N/A	#N/A	#N/A	#N/A	1.6	0.9	1	1	1	0	0	0
Tb927.9.7470	purine nucleoside transporter NT10	Nucleotides	#N/A	#N/A	#N/A	#N/A	#N/A	#N/A	#N/A	#N/A	#N/A	#N/A	0.9	1.7	1	1	1	0	0	0
Tb927.4.3320	uracil phosphoribosyltransferase, putative	Nucleotides	#N/A	#N/A	#N/A	#N/A	#N/A	#N/A	#N/A	#N/A	#N/A	#N/A	1.1	1.6	0.9	1.2	1	0	0	0
Tb927.11.14610	procyclin-associated gene 4 (PAG4) protein, putative	PAG	#N/A	#N/A	#N/A	#N/A	missense_variant	#N/A	#N/A	#N/A	#N/A	#N/A	0.8	1.6	0.8	1.3	1	0	0	1
Tb927.10.10220	procyclin-associated gene 2 (PAG2) protein (PAG2)	PAG	#N/A	#N/A	#N/A	#N/A	#N/A	#N/A	#N/A	#N/A	#N/A	#N/A	0.8	2.6	0.9	1.4	1	0	0	0
Tb927.10.5690	procyclin-associated gene 2 (PAG2) protein, putative	PAG	#N/A	#N/A	#N/A	#N/A	#N/A	#N/A	#N/A	#N/A	#N/A	#N/A	0.9	2.1	0.9	1.4	1	0	0	0
Tb927.11.14600	procyclin-associated gene 2-like protein, putative	PAG	#N/A	#N/A	#N/A	#N/A	#N/A	#N/A	#N/A	#N/A	#N/A	#N/A	1.1	1.5	0.9	1.1	1	0	0	0
Tb927.10.10210	procyclin-associated gene 4 (PAG4) protein (PAG4)	PAG	#N/A	#N/A	#N/A	#N/A	#N/A	#N/A	#N/A	#N/A	#N/A	#N/A	1	1.6	1	1.2	1	0	0	0
Tb927.10.10230	procyclin-associated gene 5 (PAG5) protein (PAG5)	PAG	#N/A	#N/A	#N/A	#N/A	#N/A	#N/A	#N/A	#N/A	#N/A	#N/A	0.7	2.6	0.9	1.3	1	0	0	0
Tb927.5.610	acidic phosphatase, putative	Phosphatase	#N/A	#N/A	#N/A	#N/A	#N/A	#N/A	#N/A	#N/A	#N/A	#N/A	1	1.2	0.6	0.5	0	1	0	0
Tb927.5.2960	phosphoribosylpyrophosphate synthetase, putative (PRS)	PPP	#N/A	#N/A	#N/A	#N/A	#N/A	#N/A	#N/A	#N/A	#N/A	#N/A	1	0.9	0.7	0.5	0	1	0	0
Tb927.9.12690	prenyl protein specific carboxyl methyltransferase	Prenylation	#N/A	#N/A	#N/A	#N/A	#N/A	#N/A	#N/A	#N/A	#N/A	#N/A	0.8	1.6	0.9	1.2	1	0	0	0
Tb927.10.13030	calpain-like cysteine peptidase, putative,cysteine peptidase, Clan CA, family C2, putative	Protease	#N/A	#N/A	#N/A	#N/A	#N/A	#N/A	#N/A	#N/A	#N/A	#N/A	1	1.5	0.9	1.3	1	0	0	0
Tb927.8.6450	inhibitor of cysteine peptidase (ICP)	Protease	#N/A	#N/A	#N/A	#N/A	#N/A	#N/A	#N/A	#N/A	#N/A	#N/A	0.9	2.3	1	1.2	1	0	0	0
Tb927.5.1730	inhibitor of serine peptidase (ISP), putative,ecotin family (I11), putative	Protease	#N/A	#N/A	#N/A	#N/A	#N/A	#N/A	#N/A	#N/A	#N/A	#N/A	1	1.8	0.6	0.9	1	0	0	0
Tb927.9.14220	metacaspase MCA5	Protease	#N/A	#N/A	#N/A	#N/A	#N/A	#N/A	#N/A	#N/A	#N/A	#N/A	1.1	1.5	1.1	1.3	1	0	0	0
Tb927.9.4940	presenilin-like aspartic peptidase, putative	Protease	#N/A	#N/A	#N/A	#N/A	#N/A	#N/A	#N/A	#N/A	#N/A	#N/A	1	1.7	1	1.3	1	0	0	0
Tb927.5.4300	prolyl oligopeptidase, putative	Protease	#N/A	#N/A	#N/A	#N/A	#N/A	#N/A	#N/A	#N/A	#N/A	#N/A	1.5	1	1.1	1.1	1	0	0	0
Tb927.7.3210	protein kinase, putative	Protein.kinase	#N/A	#N/A	#N/A	#N/A	#N/A	#N/A	missense_variant	#N/A	#N/A	#N/A	0.9	1.2	1.1	1.2	0	0	0	1
Tb927.7.940	protein kinase C substrate protein, heavy chain, putative,glucosidase II beta subunit, putative	Protein.kinase	#N/A	#N/A	#N/A	#N/A	#N/A	#N/A	#N/A	#N/A	#N/A	#N/A	0.9	1.5	0.8	1.2	1	0	0	0
Tb927.11.10820	protein kinase ck2 regulatory subunit beta, putative	Protein.kinase	#N/A	#N/A	#N/A	#N/A	#N/A	#N/A	#N/A	#N/A	#N/A	#N/A	1.2	1.8	1.1	1.1	1	0	0	0
Tb927.2.1820	protein kinase, putative	Protein.kinase	#N/A	#N/A	#N/A	#N/A	#N/A	#N/A	#N/A	#N/A	#N/A	#N/A	1	1.5	1	0.9	1	0	0	0
Tb927.5.4430	protein kinase, putative	Protein.kinase	#N/A	#N/A	#N/A	#N/A	#N/A	#N/A	#N/A	#N/A	#N/A	#N/A	1.5	0.8	1.1	0.9	1	0	0	0
Tb927.7.6680	protein kinase, putative	Protein.kinase	#N/A	#N/A	#N/A	#N/A	#N/A	#N/A	#N/A	#N/A	#N/A	#N/A	1.1	1.5	1.2	0.9	1	0	0	0
Tb927.10.10350	protein kinase, putative	Protein.kinase	#N/A	#N/A	#N/A	#N/A	#N/A	#N/A	#N/A	#N/A	#N/A	#N/A	0.9	1.7	1	1.1	1	0	0	0
Tb927.10.12040	protein kinase, putative,mitogen-activated protein kinase 11, putative	Protein.kinase	#N/A	#N/A	#N/A	#N/A	#N/A	#N/A	#N/A	#N/A	#N/A	#N/A	0.9	1.8	0.8	1.1	1	0	0	0
Tb927.3.5400	RIO1 protein kinase	Protein.kinase	#N/A	#N/A	#N/A	#N/A	#N/A	#N/A	#N/A	#N/A	#N/A	#N/A	0.9	1.6	0.9	0.9	1	0	0	0
Tb927.5.1650	serine/threonine-protein kinase, putative,protein kinase, putative	Protein.kinase	#N/A	#N/A	#N/A	#N/A	#N/A	#N/A	#N/A	#N/A	#N/A	#N/A	1	0.7	0.6	0.5	0	1	0	0
Tb927.10.4930	protein phosphatase 2C, putative	Protein.phosphatase	#N/A	#N/A	#N/A	#N/A	#N/A	#N/A	#N/A	#N/A	#N/A	#N/A	1.2	1.7	1.1	1.2	1	0	0	0
Tb927.11.10340	Putative serine/threonine protein phosphatase	Protein.phosphatase	#N/A	#N/A	#N/A	#N/A	#N/A	#N/A	#N/A	#N/A	#N/A	#N/A	1	1.6	0.9	1.3	1	0	0	0
Tb927.3.3760	tryparedoxin (TRYP1)	Redox	missense_variant	#N/A	missense_variant	#N/A	#N/A	#N/A	#N/A	#N/A	#N/A	#N/A	1.2	0.4	1.1	0.9	0	1	0	1
Tb927.4.1860	40S ribosomal protein S19	Ribosome	#N/A	#N/A	#N/A	#N/A	#N/A	#N/A	#N/A	#N/A	#N/A	#N/A	0.9	1.5	0.9	0.8	1	0	0	0
Tb927.10.7710	40S ribosomal protein S8	Ribosome	#N/A	#N/A	#N/A	#N/A	#N/A	#N/A	#N/A	#N/A	#N/A	#N/A	0.9	1.4	1.2	1.5	1	0	0	0
Tb927.11.15880	60S ribosomal protein L27	Ribosome	#N/A	#N/A	#N/A	#N/A	#N/A	#N/A	#N/A	#N/A	#N/A	#N/A	0.9	1.6	0.8	1.1	1	0	0	0
Tb927.11.3230	60S ribosomal protein L44	Ribosome	#N/A	#N/A	#N/A	#N/A	#N/A	#N/A	#N/A	#N/A	#N/A	#N/A	1	0.3	0.8	0.7	0	1	0	0
Tb927.11.4450	ALBA2	RNA.binding	#N/A	#N/A	#N/A	#N/A	#N/A	#N/A	#N/A	#N/A	#N/A	#N/A	1	1.8	0.8	1.3	1	0	0	0
Tb927.11.14090	DRBD18	RNA.binding	#N/A	#N/A	#N/A	#N/A	#N/A	#N/A	#N/A	#N/A	#N/A	#N/A	1	1.5	1	1	1	0	0	0
Tb927.9.13990	DRBD2	RNA.binding	#N/A	#N/A	#N/A	#N/A	#N/A	#N/A	#N/A	#N/A	#N/A	#N/A	1.1	1.5	1.1	1	1	0	0	0
Tb927.5.3750	PPCT1	RNA.binding	#N/A	#N/A	#N/A	#N/A	#N/A	#N/A	#N/A	#N/A	#N/A	#N/A	1.5	1.3	1	1.2	1	0	0	0
Tb927.8.4450	RBP11	RNA.binding	#N/A	#N/A	#N/A	#N/A	#N/A	#N/A	#N/A	#N/A	#N/A	#N/A	1	1.7	1	1.3	1	0	0	0
Tb927.7.1180	RBP19	RNA.binding	#N/A	#N/A	#N/A	#N/A	#N/A	#N/A	#N/A	#N/A	#N/A	#N/A	1	1.6	1	1.3	1	0	0	0
Tb927.8.6440	RBP20	RNA.binding	#N/A	#N/A	#N/A	#N/A	#N/A	#N/A	#N/A	#N/A	#N/A	#N/A	0.8	1.6	1	0.9	1	0	0	0
Tb927.3.2930	RBP6	RNA.binding	#N/A	#N/A	#N/A	#N/A	#N/A	#N/A	#N/A	#N/A	#N/A	#N/A	0.9	1.5	0.9	1.3	1	0	0	0
Tb927.3.3970	RNA binding protein, putative, LYAR-type C2HC zinc finger domain	RNA.binding	#N/A	#N/A	#N/A	#N/A	#N/A	#N/A	#N/A	#N/A	#N/A	#N/A	0.8	2.1	0.9	1	1	0	0	0
Tb927.5.810	ZC3H11	RNA.binding	#N/A	#N/A	#N/A	#N/A	#N/A	#N/A	#N/A	#N/A	#N/A	#N/A	1	0.8	0.6	0.5	0	1	0	0
Tb927.9.9450	ZC3H28	RNA.binding	#N/A	#N/A	#N/A	#N/A	#N/A	#N/A	#N/A	#N/A	#N/A	#N/A	1.1	1.5	1.2	0.9	1	0	0	0
Tb927.11.8470	ZC3H45	RNA.binding	#N/A	#N/A	#N/A	#N/A	#N/A	#N/A	#N/A	#N/A	#N/A	#N/A	1.1	1.8	1.2	0.9	1	0	0	0
Tb927.9.10280	ZC3H48	RNA.binding	#N/A	#N/A	#N/A	#N/A	#N/A	#N/A	#N/A	#N/A	#N/A	#N/A	1	2.7	0.9	1.3	1	0	0	0
Tb927.3.740	ZC3H5	RNA.binding	#N/A	#N/A	#N/A	#N/A	#N/A	#N/A	#N/A	#N/A	#N/A	#N/A	1	1.6	0.9	0.9	1	0	0	0
Tb927.3.790	ZC3H6	RNA.binding	#N/A	#N/A	#N/A	#N/A	#N/A	#N/A	#N/A	#N/A	#N/A	#N/A	0.9	1.5	0.9	1.2	1	0	0	0
Tb927.3.5250	ZC3H8	RNA.binding	#N/A	#N/A	#N/A	#N/A	#N/A	#N/A	#N/A	#N/A	#N/A	#N/A	0.9	1.5	1	1.1	1	0	0	0
Tb927.6.3490	ZFP1	RNA.binding	#N/A	#N/A	#N/A	#N/A	#N/A	#N/A	#N/A	#N/A	#N/A	#N/A	1	3.3	1	1.3	1	0	0	0
Tb927.4.410	CAF40	RNA.degradation	#N/A	#N/A	#N/A	#N/A	#N/A	#N/A	#N/A	#N/A	#N/A	#N/A	1.1	1.7	0.9	1.4	1	0	0	0
Tb927.5.1200	CSL4 exosome component	RNA.degradation	#N/A	#N/A	#N/A	#N/A	#N/A	#N/A	#N/A	#N/A	#N/A	#N/A	1	0.9	0.8	0.5	0	1	0	0
Tb927.11.16600	EAP2 exosome-associated protein 2	RNA.degradation	#N/A	#N/A	#N/A	#N/A	#N/A	#N/A	#N/A	#N/A	#N/A	#N/A	1.1	1.5	0.9	1.2	1	0	0	0
Tb927.8.1960	NOT11	RNA.degradation	#N/A	#N/A	#N/A	#N/A	#N/A	#N/A	#N/A	#N/A	#N/A	#N/A	0.9	1.6	0.9	1.1	1	0	0	0
Tb927.6.850	NOT2	RNA.degradation	#N/A	#N/A	#N/A	#N/A	#N/A	#N/A	#N/A	#N/A	#N/A	#N/A	1	2.2	1	1.3	1	0	0	0
Tb927.10.8360	PARN-2	RNA.degradation	#N/A	#N/A	#N/A	#N/A	#N/A	#N/A	#N/A	#N/A	#N/A	#N/A	0.9	1.5	1	1.4	1	0	0	0
Tb927.10.8880	RIF4 involved in RNAi	RNA.degradation	#N/A	#N/A	#N/A	#N/A	#N/A	#N/A	#N/A	#N/A	#N/A	#N/A	1	1.7	0.9	1.4	1	0	0	0
Tb927.11.550	SCD6	RNA.degradation	#N/A	#N/A	#N/A	#N/A	#N/A	#N/A	#N/A	#N/A	#N/A	#N/A	0.9	1.5	1	1.1	1	0	0	0
Tb927.10.9660	CRN/SYF3 part of splicing PRP19 complex, putative	RNA.processing	#N/A	#N/A	#N/A	#N/A	#N/A	#N/A	missense_variant	#N/A	#N/A	#N/A	1	0.9	1	1.1	0	0	0	1
Tb927.5.3600	ATP-dependent DEAD/H RNA helicase, putative Prp5, splicing?	RNA.processing	#N/A	#N/A	#N/A	#N/A	#N/A	#N/A	#N/A	#N/A	#N/A	#N/A	1.5	0.9	1	1.1	1	0	0	0
Tb927.8.2090	cyclophilin type peptidyl-prolyl cis-trans isomerase, copurifed with splicing complexes	RNA.processing	#N/A	#N/A	#N/A	#N/A	#N/A	#N/A	#N/A	#N/A	#N/A	#N/A	1	1.8	1.1	1.3	1	0	0	0
Tb927.1.1790	hypothetical PIN domain-containing protein, conserved	RNA.processing	#N/A	#N/A	#N/A	#N/A	#N/A	#N/A	#N/A	#N/A	#N/A	#N/A	1	1.9	0.8	1.2	1	0	0	0
Tb927.3.1780	LSm8	RNA.processing	#N/A	#N/A	#N/A	#N/A	#N/A	#N/A	#N/A	#N/A	#N/A	#N/A	0.8	1.8	0.9	1.3	1	0	0	0
Tb927.9.14120	NIF superfamily phosphatase domain, possible splicing factor	RNA.processing	#N/A	#N/A	#N/A	#N/A	#N/A	#N/A	#N/A	#N/A	#N/A	#N/A	1	1.7	1	1	1	0	0	0
Tb927.10.11950	Putative Cwc15, copurified with splicing complex	RNA.processing	#N/A	#N/A	#N/A	#N/A	#N/A	#N/A	#N/A	#N/A	#N/A	#N/A	1	1.6	1.1	1.3	1	0	0	0
Tb927.8.900	splicing factor TSR1 (TSR1)	RNA.processing	#N/A	#N/A	#N/A	#N/A	#N/A	#N/A	#N/A	#N/A	#N/A	#N/A	1.1	1	1.5	0.8	1	0	0	0
Tb927.11.15000	survival of motor neuron (SMN)-like protein (TbSMN)	RNA.processing	#N/A	#N/A	#N/A	#N/A	#N/A	#N/A	#N/A	#N/A	#N/A	#N/A	1	2.2	1.3	1.2	1	0	0	0
Tb927.10.2120	U1 small nuclear ribonucleoprotein C, putative (U2-40K)	RNA.processing	#N/A	#N/A	#N/A	#N/A	#N/A	#N/A	#N/A	#N/A	#N/A	#N/A	0.8	2	0.9	1.3	1	0	0	0
Tb927.10.4950	U2 small nuclear ribonucleoprotein 16.5K SSm2-2/Sm16.5K	RNA.processing	#N/A	#N/A	#N/A	#N/A	#N/A	#N/A	#N/A	#N/A	#N/A	#N/A	1	1.6	1.1	1	1	0	0	0
Tb927.4.3490	DNA-directed RNA polymerase subunit, putative, (RPB6)	RNA.synthesis	#N/A	#N/A	#N/A	#N/A	#N/A	#N/A	#N/A	#N/A	#N/A	#N/A	1.1	1.5	1.4	1.1	1	0	0	0
Tb927.11.14490	RNA polymerase subunit, putative (RPB7)	RNA.synthesis	#N/A	#N/A	#N/A	#N/A	#N/A	#N/A	#N/A	#N/A	#N/A	#N/A	1	1.7	1	1.2	1	0	0	0
Tb927.1.1080	TFIIH basal transcription factor subunit (TSP1)	RNA.synthesis	#N/A	#N/A	#N/A	#N/A	#N/A	#N/A	#N/A	#N/A	#N/A	#N/A	1.1	1.5	1.3	1.2	1	0	0	0
Tb927.1.1630	transcription elongation factor 1 homolog (ELOF1)	RNA.synthesis	#N/A	#N/A	#N/A	#N/A	#N/A	#N/A	#N/A	#N/A	#N/A	#N/A	0.9	1.3	1.1	1.8	1	0	0	0
Tb927.8.1510	ATP-dependent DEAD/H RNA helicase, putative Dbp3, ribosome biogenesis? Cis-spliced	rRNA.tRNA.process	#N/A	#N/A	#N/A	#N/A	#N/A	#N/A	#N/A	#N/A	#N/A	#N/A	1	0.4	1.1	0.4	0	1	0	0
Tb927.5.4270	ATP-dependent DEAD/H RNA helicase, putative Hca4, ribosome biogenesis?	rRNA.tRNA.process	#N/A	#N/A	#N/A	#N/A	#N/A	#N/A	#N/A	#N/A	#N/A	#N/A	1.7	1.3	1.1	1.2	1	0	0	0
Tb927.10.15810	Fcf1 pre-rRNA processing, putative	rRNA.tRNA.process	#N/A	#N/A	#N/A	#N/A	#N/A	#N/A	#N/A	#N/A	#N/A	#N/A	1	1.3	1	1.7	1	0	0	0
Tb927.10.7810	Homologue of yeast ESF1,nucleolar protein involved in pre-rRNA processing	rRNA.tRNA.process	#N/A	#N/A	#N/A	#N/A	#N/A	#N/A	#N/A	#N/A	#N/A	#N/A	1.1	1.6	1.1	1.2	1	0	0	0
Tb927.8.730	nucleolar RNA-binding protein, putative	rRNA.tRNA.process	#N/A	#N/A	#N/A	#N/A	#N/A	#N/A	#N/A	#N/A	#N/A	#N/A	1	1.7	1.2	1.2	1	0	0	0
Tb927.8.750	nucleolar RNA-binding protein, putative	rRNA.tRNA.process	#N/A	#N/A	#N/A	#N/A	#N/A	#N/A	#N/A	#N/A	#N/A	#N/A	0.9	2.3	0.9	1.4	1	0	0	0
Tb927.10.4740	nucleolar RNA-binding protein, putative	rRNA.tRNA.process	#N/A	#N/A	#N/A	#N/A	#N/A	#N/A	#N/A	#N/A	#N/A	#N/A	0.8	1.2	0.6	1.6	1	0	0	0
Tb927.3.2470	PUF8	rRNA.tRNA.process	#N/A	#N/A	#N/A	#N/A	#N/A	#N/A	#N/A	#N/A	#N/A	#N/A	0.9	1.5	0.8	1.1	1	0	0	0
Tb927.11.15170	ribosome biogenesis protein TSR3, putative (tsr3)	rRNA.tRNA.process	#N/A	#N/A	#N/A	#N/A	#N/A	#N/A	#N/A	#N/A	#N/A	#N/A	0.9	1.5	1.1	1	1	0	0	0
Tb927.4.470	snoRNP protein GAR1, putative	rRNA.tRNA.process	#N/A	#N/A	#N/A	#N/A	#N/A	#N/A	#N/A	#N/A	#N/A	#N/A	1	2.4	1.4	1.4	1	0	0	0
Tb927.5.3850	XRNE	rRNA.tRNA.process	#N/A	#N/A	#N/A	#N/A	#N/A	#N/A	#N/A	#N/A	#N/A	#N/A	1.5	1.5	1	1	1	0	0	0
Tb927.11.9530	14-3-3-I protein	Signalling	#N/A	#N/A	#N/A	#N/A	#N/A	#N/A	#N/A	#N/A	#N/A	#N/A	1.1	0.4	1.1	0.4	0	1	0	0
Tb927.5.2690	inositol-1(or 4)-monophosphatase 1, putative (IMPase 1)	Signalling	#N/A	#N/A	#N/A	#N/A	#N/A	#N/A	#N/A	#N/A	#N/A	#N/A	1.1	0.6	0.7	0.4	0	1	0	0
Tb927.10.14550	DED1-1, ATP-dependent DEAD/H RNA helicase, VASA homologue	Translation	#N/A	#N/A	#N/A	#N/A	#N/A	#N/A	#N/A	#N/A	#N/A	#N/A	1.1	1.5	1.1	1	1	0	0	0
Tb927.3.2900	EF-2 alpha, elongation initiation factor 2 alpha subunit,	Translation	#N/A	#N/A	#N/A	#N/A	#N/A	#N/A	#N/A	#N/A	#N/A	#N/A	0.9	1.6	0.9	0.8	1	0	0	0
Tb927.8.5880	eIF1A	Translation	#N/A	#N/A	#N/A	#N/A	#N/A	#N/A	#N/A	#N/A	#N/A	#N/A	1	1.8	1	1.1	1	0	0	0
Tb927.5.3120	eIF2 beta	Translation	#N/A	#N/A	#N/A	#N/A	#N/A	#N/A	#N/A	#N/A	#N/A	#N/A	0.9	1.7	0.6	0.7	1	0	0	0
Tb927.7.2720	eIF3c	Translation	#N/A	#N/A	#N/A	#N/A	#N/A	#N/A	#N/A	#N/A	#N/A	#N/A	1.1	1.7	1.1	1.4	1	0	0	0
Tb927.11.15420	eIF3K	Translation	#N/A	#N/A	#N/A	#N/A	#N/A	#N/A	#N/A	#N/A	#N/A	#N/A	1	1.5	0.8	1.3	1	0	0	0
Tb927.11.2260	eIF4E1	Translation	#N/A	#N/A	#N/A	#N/A	#N/A	#N/A	#N/A	#N/A	#N/A	#N/A	0.9	1.6	0.9	1.1	1	0	0	0
Tb927.10.5020	eIF4E5	Translation	#N/A	#N/A	#N/A	#N/A	#N/A	#N/A	#N/A	#N/A	#N/A	#N/A	1	1.6	1.3	1.2	1	0	0	0
Tb927.9.4960	hypothetical protein, conserved	Translation	#N/A	#N/A	#N/A	#N/A	#N/A	#N/A	#N/A	#N/A	#N/A	#N/A	0.9	1.7	1.1	1.3	1	0	0	0
Tb927.5.2430	membrane transporter protein, putative	Transporter	#N/A	#N/A	#N/A	#N/A	#N/A	#N/A	#N/A	#N/A	#N/A	#N/A	0.9	1.5	0.7	0.8	1	0	0	0
Tb927.9.11790	membrane transporter protein, putative	Transporter	#N/A	#N/A	#N/A	#N/A	#N/A	#N/A	#N/A	#N/A	#N/A	#N/A	1	1.5	1	1.2	1	0	0	0
Tb927.9.11810	membrane transporter protein, putative	Transporter	#N/A	#N/A	#N/A	#N/A	#N/A	#N/A	#N/A	#N/A	#N/A	#N/A	0.9	1.8	0.9	1.4	1	0	0	0
Tb927.5.470	Riboflavin transporter	Transporter	#N/A	#N/A	#N/A	#N/A	#N/A	#N/A	#N/A	#N/A	#N/A	#N/A	0.9	2.2	0.5	0.6	1	1	0	0
Tb927.11.12770	ubiquitin ligase, putative	Ubiquitin.proteasome	#N/A	#N/A	#N/A	#N/A	#N/A	#N/A	missense_variant	#N/A	#N/A	#N/A	1	1	1	1	0	0	0	1
Tb927.10.2250	ubiquitin-conjugating enzyme variant Kua homologue, putative	Ubiquitin.proteasome	#N/A	#N/A	#N/A	#N/A	#N/A	#N/A	missense_variant	#N/A	#N/A	#N/A	1	1.8	0.9	1.4	1	0	0	1
Tb927.2.1890	E2-like ubiquitin-conjugation enzyme (ATG3)	Ubiquitin.proteasome	#N/A	#N/A	#N/A	#N/A	#N/A	#N/A	#N/A	#N/A	#N/A	#N/A	0.9	1.8	0.9	1.1	1	0	0	0
Tb927.9.5650	E2-like ubiquitin-conjugation enzyme, putative	Ubiquitin.proteasome	#N/A	#N/A	#N/A	#N/A	#N/A	#N/A	#N/A	#N/A	#N/A	#N/A	0.9	1.6	0.9	1.4	1	0	0	0
Tb927.9.9670	proteasome alpha 6 subunit (putative) (TbPSA6)	Ubiquitin.proteasome	#N/A	#N/A	#N/A	#N/A	#N/A	#N/A	#N/A	#N/A	#N/A	#N/A	1	0.5	1	0.8	0	1	0	0
Tb927.10.6080	proteasome beta 5 subunit, putative,proteasome beta 5 subunit (PRCE)	Ubiquitin.proteasome	#N/A	#N/A	#N/A	#N/A	#N/A	#N/A	#N/A	#N/A	#N/A	#N/A	1.1	1.4	1.1	1.5	1	0	0	0
Tb927.4.430	proteasome beta 7 subunit	Ubiquitin.proteasome	#N/A	#N/A	#N/A	#N/A	#N/A	#N/A	#N/A	#N/A	#N/A	#N/A	0.9	1.9	1	1.3	1	0	0	0
Tb927.5.3210	small ubiquitin-related modifier, putative (SUMO)	Ubiquitin.proteasome	#N/A	#N/A	#N/A	#N/A	#N/A	#N/A	#N/A	#N/A	#N/A	#N/A	0.9	2.1	0.5	1.2	1	1	0	0
Tb927.9.8000	ubiquitin-conjugating enzyme e2, putative	Ubiquitin.proteasome	#N/A	#N/A	#N/A	#N/A	#N/A	#N/A	#N/A	#N/A	#N/A	#N/A	1	1.7	0.9	1.1	1	0	0	0
Tb927.2.3720	ubiquitin-conjugating enzyme, putative	Ubiquitin.proteasome	#N/A	#N/A	#N/A	#N/A	#N/A	#N/A	#N/A	#N/A	#N/A	#N/A	0.9	1.7	1.1	1.1	1	0	0	0
Tb927.11.3310	ubiquitin-conjugating enzyme, putative,	Ubiquitin.proteasome	#N/A	#N/A	#N/A	#N/A	#N/A	#N/A	#N/A	#N/A	#N/A	#N/A	1	2.9	1.2	1.3	1	0	0	0
Tb927.5.4500	ras-like small GTPase, putative (TbSAR1)	Vesicular.transport	#N/A	#N/A	#N/A	#N/A	#N/A	#N/A	missense_variant	#N/A	#N/A	#N/A	1.3	4.9	0.7	1.2	1	0	0	1
Tb927.9.15930	small GTPase, putative,GTP-binding protein, putative (RAB1B)	Vesicular.transport	missense_variant	#N/A	missense_variant	#N/A	#N/A	#N/A	missense_variant	#N/A	#N/A	#N/A	0.9	0.8	0.9	1.1	0	0	0	1
Tb927.3.4000	Adaptin complex AP1 sigma subunit	Vesicular.transport	#N/A	#N/A	#N/A	#N/A	#N/A	#N/A	#N/A	#N/A	#N/A	#N/A	0.8	1.6	0.9	1.4	1	0	0	0
Tb927.10.14260	adaptin complex AP4 sigma subunit	Vesicular.transport	#N/A	#N/A	#N/A	#N/A	#N/A	#N/A	#N/A	#N/A	#N/A	#N/A	0.9	1.5	0.9	1	1	0	0	0
Tb927.3.5330	ADP-ribosylation factor GTPase activating protein, centaurin beta 5 (Cnt-b5)	Vesicular.transport	#N/A	#N/A	#N/A	#N/A	#N/A	#N/A	#N/A	#N/A	#N/A	#N/A	0.9	1.6	1	1.3	1	0	0	0
Tb927.11.9470	ADP-ribosylation factor GTPase activating protein, putative	Vesicular.transport	#N/A	#N/A	#N/A	#N/A	#N/A	#N/A	#N/A	#N/A	#N/A	#N/A	1.1	1.5	1.1	1.3	1	0	0	0
Tb927.9.15490	ADP-ribosylation factor GTPase activating protein, putative	Vesicular.transport	#N/A	#N/A	#N/A	#N/A	#N/A	#N/A	#N/A	#N/A	#N/A	#N/A	1	2.7	1	1.4	1	0	0	0
Tb927.7.6230	ADP-ribosylation factor, putative (ARF3)	Vesicular.transport	#N/A	#N/A	#N/A	#N/A	#N/A	#N/A	#N/A	#N/A	#N/A	#N/A	0.9	2	1	1.3	1	0	0	0
Tb927.10.6980	caltractin, putative	Vesicular.transport	#N/A	#N/A	#N/A	#N/A	#N/A	#N/A	#N/A	#N/A	#N/A	#N/A	0.9	1.4	1	1.6	1	0	0	0
Tb927.10.4270	coatomer zeta subunit, (zeta-CoP)	Vesicular.transport	#N/A	#N/A	#N/A	#N/A	#N/A	#N/A	#N/A	#N/A	#N/A	#N/A	1	0.5	1.2	1	0	1	0	0
Tb927.11.15230	cytosolic coat protein, putative	Vesicular.transport	#N/A	#N/A	#N/A	#N/A	#N/A	#N/A	#N/A	#N/A	#N/A	#N/A	0.9	1.9	1	1.1	1	0	0	0
Tb927.7.2510	endoplasmatic reticulum retrieval protein, putative	Vesicular.transport	#N/A	#N/A	#N/A	#N/A	#N/A	#N/A	#N/A	#N/A	#N/A	#N/A	0.9	1.5	1	1.1	1	0	0	0
Tb927.11.4200	ERGIC53 paralogue, lectin-like, ER quality control	Vesicular.transport	#N/A	#N/A	#N/A	#N/A	#N/A	#N/A	#N/A	#N/A	#N/A	#N/A	1	1.5	1.1	1.1	1	0	0	0
Tb927.11.7213	ERV46-like, ER-Golgi transport vesicles	Vesicular.transport	#N/A	#N/A	#N/A	#N/A	#N/A	#N/A	#N/A	#N/A	#N/A	#N/A	0.9	1.4	0.9	1.5	1	0	0	0
Tb927.6.440	haptoglobin-hemoglobin receptor (HpHbR)	Vesicular.transport	#N/A	#N/A	#N/A	#N/A	#N/A	#N/A	#N/A	#N/A	#N/A	#N/A	1	1.9	1.1	1.4	1	0	0	0
Tb927.1.1980	Protein transport protein yif1, putative	Vesicular.transport	#N/A	#N/A	#N/A	#N/A	#N/A	#N/A	#N/A	#N/A	#N/A	#N/A	0.9	1.5	0.9	1.3	1	0	0	0
Tb927.8.890	Ras-related protein Rab1A	Vesicular.transport	#N/A	#N/A	#N/A	#N/A	#N/A	#N/A	#N/A	#N/A	#N/A	#N/A	0.9	2.5	1	1.3	1	0	0	0
Tb927.11.15240	Ras-related protein RAB2B, putative	Vesicular.transport	#N/A	#N/A	#N/A	#N/A	#N/A	#N/A	#N/A	#N/A	#N/A	#N/A	0.9	1.5	0.7	1.1	1	0	0	0
Tb927.9.11000	ras-related protein RAB7, putative	Vesicular.transport	#N/A	#N/A	#N/A	#N/A	#N/A	#N/A	#N/A	#N/A	#N/A	#N/A	1.1	1.7	1	1.2	1	0	0	0
Tb927.8.4770	small GTP-binding protein Rab18	Vesicular.transport	#N/A	#N/A	#N/A	#N/A	#N/A	#N/A	#N/A	#N/A	#N/A	#N/A	1	1.7	1	1.4	1	0	0	0
Tb927.2.2130	small GTP-binding protein RAB6, putative	Vesicular.transport	#N/A	#N/A	#N/A	#N/A	#N/A	#N/A	#N/A	#N/A	#N/A	#N/A	0.8	1.5	1.2	1	1	0	0	0
Tb927.8.8140	small GTP-binding rab protein, putative	Vesicular.transport	#N/A	#N/A	#N/A	#N/A	#N/A	#N/A	#N/A	#N/A	#N/A	#N/A	0.9	1.5	0.9	1	1	0	0	0
Tb927.10.8560	small GTPase, putative (RAB23)	Vesicular.transport	#N/A	#N/A	#N/A	#N/A	#N/A	#N/A	#N/A	#N/A	#N/A	#N/A	0.9	1.9	1	1.2	1	0	0	0
Tb927.11.2110	SNF7 domain protein transport endosome-lysosome	Vesicular.transport	#N/A	#N/A	#N/A	#N/A	#N/A	#N/A	#N/A	#N/A	#N/A	#N/A	1	1.5	1.1	1.3	1	0	0	0
Tb927.9.10640	synaptojanin (N-terminal domain), putative	Vesicular.transport	#N/A	#N/A	#N/A	#N/A	#N/A	#N/A	#N/A	#N/A	#N/A	#N/A	1	1.5	0.9	1.1	1	0	0	0
Tb927.7.4470	translocon-associated protein gamma 4 transmembrane domains	Vesicular.transport	#N/A	#N/A	#N/A	#N/A	#N/A	#N/A	#N/A	#N/A	#N/A	#N/A	1	2.4	0.9	1.4	1	0	0	0
Tb927.2.5120	vesicle-associated membrane protein, in Tc vacuolar proteome	Vesicular.transport	#N/A	#N/A	#N/A	#N/A	#N/A	#N/A	#N/A	#N/A	#N/A	#N/A	1	1.5	1	1.4	1	0	0	0
Tb927.10.790	vesicle-associated membrane protein, putative (VAMP)	Vesicular.transport	#N/A	#N/A	#N/A	#N/A	#N/A	#N/A	#N/A	#N/A	#N/A	#N/A	1	1.5	1.1	1.2	1	0	0	0
Tb927.6.350	hypothetical protein, conserved, T. brucei specific, 2 C2H2 Zn fingers	Zinc.finger	#N/A	#N/A	#N/A	#N/A	#N/A	#N/A	#N/A	#N/A	#N/A	#N/A	1	1.6	1	1.2	1	0	0	0
Tb927.7.4190	zinc finger domain, LSD1 subclass, putative	Zinc.finger	#N/A	#N/A	#N/A	#N/A	#N/A	#N/A	#N/A	#N/A	#N/A	#N/A	0.9	2.2	1	1.4	1	0	0	0
Tb927.5.4280	Zinc finger, C3HC4 type (RING finger), putative	Zinc.finger	#N/A	#N/A	#N/A	#N/A	#N/A	#N/A	#N/A	#N/A	#N/A	#N/A	1.5	1	1.1	1	1	0	0	0
Tb927.7.6370	Zinc finger, C3HC4 type (RING finger), putative	Zinc.finger	missense_variant	#N/A	#N/A	#N/A	#N/A	#N/A	#N/A	#N/A	#N/A	#N/A	0.9	0.9	0.9	1	0	0	0	1
Tb927.7.4540	hypothetical protein, conserved	ZUnknown	#N/A	#N/A	#N/A	#N/A	missense_variant	#N/A	missense_variant	#N/A	#N/A	#N/A	0.9	0.9	1	1	0	0	0	1
Tb927.1.10	hypothetical protein	ZUnknown	#N/A	#N/A	#N/A	#N/A	#N/A	#N/A	missense_variant	#N/A	#N/A	#N/A	#N/A	#N/A	#N/A	#N/A	0	0	0	1
Tb927.11.17910	hypothetical protein	ZUnknown	#N/A	#N/A	#N/A	#N/A	#N/A	#N/A	missense_variant	#N/A	#N/A	#N/A	#N/A	#N/A	#N/A	#N/A	0	0	0	1
Tb927.3.660	hypothetical protein, conserved	ZUnknown	#N/A	#N/A	#N/A	#N/A	#N/A	#N/A	missense_variant	#N/A	#N/A	#N/A	1	1	1	0.9	0	0	0	1
Tb927.4.4930	hypothetical protein, conserved	ZUnknown	#N/A	#N/A	#N/A	#N/A	#N/A	#N/A	missense_variant	#N/A	#N/A	#N/A	1.1	0.9	1.1	0.9	0	0	0	1
Tb927.2.5540	hypothetical protein, conserved	ZUnknown	#N/A	#N/A	#N/A	#N/A	#N/A	#N/A	missense_variant	#N/A	#N/A	#N/A	1.1	1	1.1	1	0	0	0	1
Tb927.10.13260	hypothetical protein, conserved	ZUnknown	#N/A	#N/A	#N/A	#N/A	#N/A	#N/A	missense_variant	#N/A	#N/A	#N/A	1	0.9	1.1	1	0	0	0	1
Tb927.6.4400	hypothetical protein, conserved	ZUnknown	#N/A	#N/A	#N/A	#N/A	#N/A	#N/A	missense_variant	#N/A	#N/A	#N/A	1.1	1.2	1	1.1	0	0	0	1
Tb927.10.530	Plasma-membrane choline transporter, putative	ZUnknown	#N/A	#N/A	#N/A	#N/A	#N/A	#N/A	missense_variant	#N/A	#N/A	#N/A	1	1.5	0.9	1.1	1	0	0	1
Tb927.7.2180	T. brucei spp.-specific protein, putative	ZUnknown	#N/A	#N/A	#N/A	#N/A	#N/A	#N/A	missense_variant	#N/A	#N/A	#N/A	1	0.8	0.8	0.7	0	0	0	1
Tb927.5.310	invariant surface glycoprotein, putative	ZUnknown	#N/A	#N/A	missense_variant	#N/A	missense_variant	#N/A	missense_variant	#N/A	#N/A	#N/A	0.8	1.3	0.6	0.7	0	0	0	1
Tb927.2.4340	hypothetical protein, conserved	ZUnknown	#N/A	#N/A	missense_variant	#N/A	#N/A	#N/A	missense_variant	#N/A	#N/A	#N/A	1	0.9	1.1	0.8	0	0	0	1
Tb927.11.17900	Trypanosomal VSG domain containing protein, putative	ZUnknown	missense_variant	#N/A	#N/A	#N/A	#N/A	#N/A	missense_variant	#N/A	#N/A	#N/A	#N/A	#N/A	#N/A	#N/A	0	0	0	1
Tb927.9.15480	hypothetical protein	ZUnknown	missense_variant	#N/A	missense_variant	#N/A	missense_variant	#N/A	missense_variant	disruptive_inframe_insertion	missense_variant	#N/A	0.8	1.3	0.9	1	0	0	0	1
Tb927.10.10430	hypothetical protein, conserved	ZUnknown	missense_variant	#N/A	missense_variant	#N/A	missense_variant	#N/A	missense_variant	#N/A	missense_variant	#N/A	1.1	1.9	1.3	1.4	1	0	0	1
Tb927.3.5760	hypothetical protein, conserved, brucei-evansi specific, SET domain	ZUnknown	missense_variant	#N/A	missense_variant	#N/A	missense_variant	#N/A	missense_variant	#N/A	missense_variant	#N/A	1.1	1	1.2	0.9	0	0	0	1
Tb927.4.5000	TerD domain containing protein, putative	ZUnknown	missense_variant	#N/A	missense_variant	#N/A	missense_variant	#N/A	missense_variant	#N/A	missense_variant	#N/A	1	0.8	1	1	0	0	0	1
Tb927.9.140	hypothetical protein	ZUnknown	missense_variant	#N/A	missense_variant	#N/A	#N/A	#N/A	missense_variant	#N/A	#N/A	#N/A	0.8	1.3	0.9	1.1	0	0	0	1
Tb927.4.3260	hypothetical protein, conserved	ZUnknown	missense_variant	frameshift_variant	missense_variant	#N/A	#N/A	#N/A	missense_variant	#N/A	#N/A	#N/A	1.4	1.1	2.3	2.3	1	0	0	1
Tb927.10.15470	hypothetical protein, conserved	ZUnknown	missense_variant	#N/A	missense_variant	#N/A	#N/A	#N/A	missense_variant	#N/A	#N/A	#N/A	0.8	1.4	0.8	1	0	0	0	1
Tb927.7.5410	hypothetical protein, conserved	ZUnknown	missense_variant	#N/A	missense_variant	#N/A	#N/A	#N/A	missense_variant	#N/A	#N/A	#N/A	1	0.9	1	1	0	0	0	1
Tb927.10.1200	Programmed cell death protein 2, C-terminal putative domain containing protein, putative	ZUnknown	missense_variant	#N/A	missense_variant	#N/A	#N/A	#N/A	missense_variant	#N/A	#N/A	#N/A	1	1.1	1	1.1	0	0	0	1
Tb927.5.3950	2OG-Fe(II) oxygenase superfamily, putative	ZUnknown	#N/A	#N/A	#N/A	#N/A	#N/A	#N/A	#N/A	#N/A	#N/A	#N/A	1.5	1.2	1.1	0.9	1	0	0	0
Tb927.11.8450	Amastin surface glycoprotein, putative	ZUnknown	#N/A	#N/A	#N/A	#N/A	#N/A	#N/A	#N/A	#N/A	#N/A	#N/A	1	1.6	0.9	1.2	1	0	0	0
Tb927.6.4610	Ankyrin repeats (3 copies), putative	ZUnknown	#N/A	#N/A	#N/A	#N/A	#N/A	#N/A	#N/A	#N/A	#N/A	#N/A	1	1.5	1	1.3	1	0	0	0
Tb927.11.8100	Ankyrin repeats (3 copies), putative	ZUnknown	#N/A	#N/A	#N/A	#N/A	#N/A	#N/A	#N/A	#N/A	#N/A	#N/A	0.9	0.5	1	0.7	0	1	0	0
Tb927.3.2480	Arv1-like family, putative	ZUnknown	#N/A	#N/A	#N/A	#N/A	#N/A	#N/A	#N/A	#N/A	#N/A	#N/A	1	2	0.9	1.2	1	0	0	0
Tb927.7.2950	ATPase family associated with various cellular activities (AAA), putative	ZUnknown	#N/A	#N/A	#N/A	#N/A	#N/A	#N/A	#N/A	#N/A	#N/A	#N/A	1	1.5	1	1.1	1	0	0	0
Tb927.10.15790	CHCH domain containing protein, putative	ZUnknown	#N/A	#N/A	#N/A	#N/A	#N/A	#N/A	#N/A	#N/A	#N/A	#N/A	1	1.6	1.1	1.4	1	0	0	0
Tb927.3.1150	Conserved hypothetical ATP binding protein, putative	ZUnknown	#N/A	#N/A	#N/A	#N/A	#N/A	#N/A	#N/A	#N/A	#N/A	#N/A	0.8	1.6	0.8	1.4	1	0	0	0
Tb927.7.4780	conserved hypothetical protein, putative	ZUnknown	#N/A	#N/A	#N/A	#N/A	#N/A	#N/A	#N/A	#N/A	#N/A	#N/A	0.8	1.5	0.9	1	1	0	0	0
Tb927.11.440	conserved protein	ZUnknown	#N/A	#N/A	#N/A	#N/A	#N/A	#N/A	#N/A	#N/A	#N/A	#N/A	0.9	2.1	0.9	1.3	1	0	0	0
Tb927.10.11500	conserved protein	ZUnknown	#N/A	#N/A	#N/A	#N/A	#N/A	#N/A	#N/A	#N/A	#N/A	#N/A	1	1.8	1.1	1.3	1	0	0	0
Tb927.9.5220	conserved protein	ZUnknown	#N/A	#N/A	#N/A	#N/A	#N/A	#N/A	#N/A	#N/A	#N/A	#N/A	0.9	1.5	0.9	1.4	1	0	0	0
Tb927.9.8570	COPI associated protein, putative	ZUnknown	#N/A	#N/A	#N/A	#N/A	#N/A	#N/A	#N/A	#N/A	#N/A	#N/A	1.1	1.4	0.9	1.5	1	0	0	0
Tb927.8.8340	CRAL/TRIO domain containing protein, putative	ZUnknown	#N/A	#N/A	#N/A	#N/A	#N/A	#N/A	#N/A	#N/A	#N/A	#N/A	1	1.8	1	1.1	1	0	0	0
Tb927.8.1750	Cytokine-induced anti-apoptosis inhibitor 1, Fe-S biogenesis, putative	ZUnknown	#N/A	#N/A	#N/A	#N/A	#N/A	#N/A	#N/A	#N/A	#N/A	#N/A	1	1.5	0.9	0.9	1	0	0	0
Tb927.10.3330	DDRGK domain containing protein, putative	ZUnknown	#N/A	#N/A	#N/A	#N/A	#N/A	#N/A	#N/A	#N/A	#N/A	#N/A	0.9	2.1	1	1.4	1	0	0	0
Tb927.6.3340	Domain of unknown function (DUF814), putative	ZUnknown	#N/A	#N/A	#N/A	#N/A	#N/A	#N/A	#N/A	#N/A	#N/A	#N/A	0.8	1.5	0.8	1.4	1	0	0	0
Tb927.8.720	Domain of unknown function DUF59, putative	ZUnknown	#N/A	#N/A	#N/A	#N/A	#N/A	#N/A	#N/A	#N/A	#N/A	#N/A	1	1.8	1	1.3	1	0	0	0
Tb927.10.390	DUF2407 ubiquitin-like domain containing protein, putative	ZUnknown	#N/A	#N/A	#N/A	#N/A	#N/A	#N/A	#N/A	#N/A	#N/A	#N/A	0.9	1.8	0.9	1	1	0	0	0
Tb927.4.3040	Enriched in surface-labeled proteome protein 11 (ESP11)	ZUnknown	#N/A	#N/A	#N/A	#N/A	#N/A	#N/A	#N/A	#N/A	#N/A	#N/A	1	1.6	0.9	1	1	0	0	0
Tb927.7.470	Enriched in surface-labeled proteome protein 14 (ESP14)	ZUnknown	#N/A	#N/A	#N/A	#N/A	#N/A	#N/A	#N/A	#N/A	#N/A	#N/A	1.1	1.9	1	1.4	1	0	0	0
Tb927.6.4060	Eukaryotic protein of unknown function (DUF872), putative	ZUnknown	#N/A	#N/A	#N/A	#N/A	#N/A	#N/A	#N/A	#N/A	#N/A	#N/A	0.9	1.3	1.1	1.5	1	0	0	0
Tb927.5.3450	eukaryotic translation initiation factor eIF2A, putative	ZUnknown	#N/A	#N/A	#N/A	#N/A	#N/A	#N/A	#N/A	#N/A	#N/A	#N/A	1.5	1.1	0.9	1.1	1	0	0	0
Tb927.11.5740	formin-like protein	ZUnknown	#N/A	inframe_insertion	#N/A	inframe_insertion	#N/A	inframe_insertion	#N/A	inframe_insertion	#N/A	inframe_insertion	0.9	1.1	0.9	1.1	0	0	0	0
Tb927.5.2110	G-patch domain containing protein, putative	ZUnknown	#N/A	#N/A	#N/A	#N/A	#N/A	#N/A	#N/A	#N/A	#N/A	#N/A	0.9	1.3	0.6	0.5	0	1	0	0
Tb927.10.6650	G10 protein homologue, putative	ZUnknown	#N/A	#N/A	#N/A	#N/A	#N/A	#N/A	#N/A	#N/A	#N/A	#N/A	0.9	1.6	1.1	1.3	1	0	0	0
Tb927.10.8640	Galactose oxidase, central domain containing protein, putative	ZUnknown	#N/A	#N/A	#N/A	#N/A	#N/A	#N/A	#N/A	#N/A	#N/A	#N/A	0.9	1.5	1	1.2	1	0	0	0
Tb927.5.1980	Galactose oxidase, central domain/Kelch motif containing protein, putative	ZUnknown	#N/A	#N/A	#N/A	#N/A	#N/A	#N/A	#N/A	#N/A	#N/A	#N/A	0.8	0.9	0.6	0.5	0	1	0	0
Tb927.7.7060	Got1/Sft2-like family, putative	ZUnknown	#N/A	#N/A	#N/A	#N/A	#N/A	#N/A	#N/A	#N/A	#N/A	#N/A	0.7	1.8	1	1.4	1	0	0	0
Tb927.11.6290	HIT zinc finger, putative	ZUnknown	#N/A	#N/A	#N/A	#N/A	#N/A	#N/A	#N/A	#N/A	#N/A	#N/A	1	0.5	0.9	0.9	0	1	0	0
Tb927.3.4010	hypothetical protein	ZUnknown	#N/A	frameshift_variant	#N/A	#N/A	#N/A	#N/A	#N/A	#N/A	#N/A	#N/A	1	1.3	1.1	1.2	0	0	0	0
Tb927.11.16190	hypothetical protein	ZUnknown	#N/A	#N/A	#N/A	#N/A	#N/A	frameshift_variant	#N/A	#N/A	#N/A	#N/A	1	0.9	0.9	1.1	0	0	0	0
Tb927.5.3130	hypothetical protein	ZUnknown	#N/A	#N/A	#N/A	#N/A	#N/A	#N/A	#N/A	#N/A	#N/A	#N/A	1	1.6	0.7	0.7	1	0	0	0
Tb927.10.8350	hypothetical protein	ZUnknown	#N/A	#N/A	#N/A	#N/A	#N/A	#N/A	#N/A	#N/A	#N/A	#N/A	1.2	1.5	1.6	0.9	1	0	0	0
Tb927.5.3100	hypothetical protein	ZUnknown	#N/A	#N/A	#N/A	#N/A	#N/A	#N/A	#N/A	#N/A	#N/A	#N/A	1	2.2	0.7	1	1	0	0	0
Tb927.11.12730	hypothetical protein	ZUnknown	#N/A	#N/A	#N/A	#N/A	#N/A	#N/A	#N/A	#N/A	#N/A	#N/A	0.8	1.8	1	1	1	0	0	0
Tb927.8.6630	hypothetical protein	ZUnknown	#N/A	#N/A	#N/A	#N/A	#N/A	#N/A	#N/A	#N/A	#N/A	#N/A	1.1	1.7	1	1	1	0	0	0
Tb927.11.15390	hypothetical protein	ZUnknown	#N/A	#N/A	#N/A	#N/A	#N/A	#N/A	#N/A	#N/A	#N/A	#N/A	0.8	1.5	0.8	1.1	1	0	0	0
Tb927.9.17940	hypothetical protein	ZUnknown	#N/A	#N/A	#N/A	#N/A	#N/A	#N/A	#N/A	#N/A	#N/A	#N/A	0.9	2	1	1.1	1	0	0	0
Tb927.7.5800	hypothetical protein	ZUnknown	#N/A	#N/A	#N/A	#N/A	#N/A	#N/A	#N/A	#N/A	#N/A	#N/A	1	1.7	1.1	1.1	1	0	0	0
Tb927.2.2090	hypothetical protein	ZUnknown	#N/A	#N/A	#N/A	#N/A	#N/A	#N/A	#N/A	#N/A	#N/A	#N/A	1	1.6	1.1	1.1	1	0	0	0
Tb927.9.15850	hypothetical protein	ZUnknown	#N/A	#N/A	#N/A	#N/A	#N/A	#N/A	#N/A	#N/A	#N/A	#N/A	1.2	1.8	1.2	1.1	1	0	0	0
Tb927.7.7390	hypothetical protein	ZUnknown	#N/A	#N/A	#N/A	#N/A	#N/A	#N/A	#N/A	#N/A	#N/A	#N/A	1.1	1.7	1.2	1.1	1	0	0	0
Tb927.6.3080	hypothetical protein	ZUnknown	#N/A	#N/A	#N/A	#N/A	#N/A	#N/A	#N/A	#N/A	#N/A	#N/A	1	1.7	1.2	1.1	1	0	0	0
Tb927.5.540	hypothetical protein	ZUnknown	#N/A	#N/A	#N/A	#N/A	#N/A	#N/A	#N/A	#N/A	#N/A	#N/A	1	2.2	0.6	1.2	1	0	0	0
Tb927.9.14510	hypothetical protein	ZUnknown	#N/A	#N/A	#N/A	#N/A	#N/A	#N/A	#N/A	#N/A	#N/A	#N/A	0.8	2	0.8	1.2	1	0	0	0
Tb927.7.6700	hypothetical protein	ZUnknown	#N/A	#N/A	#N/A	#N/A	#N/A	#N/A	#N/A	#N/A	#N/A	#N/A	1.1	2	0.9	1.2	1	0	0	0
Tb927.10.2450	hypothetical protein	ZUnknown	#N/A	#N/A	#N/A	#N/A	#N/A	#N/A	#N/A	#N/A	#N/A	#N/A	0.9	2	0.9	1.2	1	0	0	0
Tb927.9.2890	hypothetical protein	ZUnknown	#N/A	#N/A	#N/A	#N/A	#N/A	#N/A	#N/A	#N/A	#N/A	#N/A	1	1.8	0.9	1.2	1	0	0	0
Tb927.4.3480	hypothetical protein	ZUnknown	#N/A	#N/A	#N/A	#N/A	#N/A	#N/A	#N/A	#N/A	#N/A	#N/A	0.9	1.6	1	1.2	1	0	0	0
Tb927.11.8840	hypothetical protein	ZUnknown	#N/A	#N/A	#N/A	#N/A	#N/A	#N/A	#N/A	#N/A	#N/A	#N/A	1.1	1.6	1.1	1.2	1	0	0	0
Tb927.10.14940	hypothetical protein	ZUnknown	#N/A	#N/A	#N/A	#N/A	#N/A	#N/A	#N/A	#N/A	#N/A	#N/A	1	3.1	0.9	1.3	1	0	0	0
Tb927.10.1020	hypothetical protein	ZUnknown	#N/A	#N/A	#N/A	#N/A	#N/A	#N/A	#N/A	#N/A	#N/A	#N/A	0.9	2.9	1	1.3	1	0	0	0
Tb927.6.810	hypothetical protein	ZUnknown	#N/A	#N/A	#N/A	#N/A	#N/A	#N/A	#N/A	#N/A	#N/A	#N/A	0.9	1.6	1	1.3	1	0	0	0
Tb927.11.4310	hypothetical protein	ZUnknown	#N/A	#N/A	#N/A	#N/A	#N/A	#N/A	#N/A	#N/A	#N/A	#N/A	1.1	1.9	1.1	1.3	1	0	0	0
Tb927.10.14050	hypothetical protein	ZUnknown	#N/A	#N/A	#N/A	#N/A	#N/A	#N/A	#N/A	#N/A	#N/A	#N/A	1.1	1.8	1.1	1.3	1	0	0	0
Tb927.1.3350	hypothetical protein	ZUnknown	#N/A	#N/A	#N/A	#N/A	#N/A	#N/A	#N/A	#N/A	#N/A	#N/A	0.9	1.7	1.1	1.3	1	0	0	0
Tb927.4.2100	hypothetical protein	ZUnknown	#N/A	#N/A	#N/A	#N/A	#N/A	#N/A	#N/A	#N/A	#N/A	#N/A	0.9	1.6	0.8	1.4	1	0	0	0
Tb927.10.4360	hypothetical protein	ZUnknown	#N/A	#N/A	#N/A	#N/A	#N/A	#N/A	#N/A	#N/A	#N/A	#N/A	0.7	2.7	0.9	1.4	1	0	0	0
Tb927.7.7510	hypothetical protein	ZUnknown	#N/A	#N/A	#N/A	#N/A	#N/A	#N/A	#N/A	#N/A	#N/A	#N/A	0.9	2.5	0.9	1.4	1	0	0	0
Tb927.3.3700	hypothetical protein	ZUnknown	#N/A	#N/A	#N/A	#N/A	#N/A	#N/A	#N/A	#N/A	#N/A	#N/A	0.9	2.1	0.9	1.4	1	0	0	0
Tb927.3.5670	hypothetical protein	ZUnknown	#N/A	#N/A	#N/A	#N/A	#N/A	#N/A	#N/A	#N/A	#N/A	#N/A	0.9	1.5	0.9	1.4	1	0	0	0
Tb927.10.13460	hypothetical protein	ZUnknown	#N/A	#N/A	#N/A	#N/A	#N/A	#N/A	#N/A	#N/A	#N/A	#N/A	1	2.2	1	1.4	1	0	0	0
Tb927.10.5720	hypothetical protein	ZUnknown	#N/A	#N/A	#N/A	#N/A	#N/A	#N/A	#N/A	#N/A	#N/A	#N/A	0.9	2.1	1	1.4	1	0	0	0
Tb927.10.14120	hypothetical protein	ZUnknown	#N/A	#N/A	#N/A	#N/A	#N/A	#N/A	#N/A	#N/A	#N/A	#N/A	1	2	1	1.4	1	0	0	0
Tb927.4.3760	hypothetical protein	ZUnknown	#N/A	#N/A	#N/A	#N/A	#N/A	#N/A	#N/A	#N/A	#N/A	#N/A	1	1.9	1	1.4	1	0	0	0
Tb927.2.3340	hypothetical protein	ZUnknown	#N/A	#N/A	#N/A	#N/A	#N/A	#N/A	#N/A	#N/A	#N/A	#N/A	1	1.7	1	1.4	1	0	0	0
Tb927.8.5930	hypothetical protein	ZUnknown	#N/A	#N/A	#N/A	#N/A	#N/A	#N/A	#N/A	#N/A	#N/A	#N/A	1	1.7	1	1.4	1	0	0	0
Tb927.10.7770	hypothetical protein	ZUnknown	#N/A	#N/A	#N/A	#N/A	#N/A	#N/A	#N/A	#N/A	#N/A	#N/A	1	1.6	1	1.4	1	0	0	0
Tb927.7.4690	hypothetical protein	ZUnknown	#N/A	#N/A	#N/A	#N/A	#N/A	#N/A	#N/A	#N/A	#N/A	#N/A	1.2	1.7	1.1	1.4	1	0	0	0
Tb927.9.17760	hypothetical protein	ZUnknown	#N/A	#N/A	#N/A	#N/A	#N/A	#N/A	#N/A	#N/A	#N/A	#N/A	1.1	2.7	1.3	1.4	1	0	0	0
Tb927.11.3210	hypothetical protein	ZUnknown	#N/A	#N/A	#N/A	#N/A	#N/A	#N/A	#N/A	#N/A	#N/A	#N/A	1.2	3.4	1.4	1.4	1	0	0	0
Tb927.10.12580	hypothetical protein	ZUnknown	#N/A	#N/A	#N/A	#N/A	#N/A	#N/A	#N/A	#N/A	#N/A	#N/A	0.9	1.3	1	1.5	1	0	0	0
Tb927.7.6020	hypothetical protein	ZUnknown	#N/A	#N/A	#N/A	#N/A	#N/A	#N/A	#N/A	#N/A	#N/A	#N/A	0.9	1.1	1	1.5	1	0	0	0
Tb927.10.6470	hypothetical protein	ZUnknown	#N/A	#N/A	#N/A	#N/A	#N/A	#N/A	#N/A	#N/A	#N/A	#N/A	1	0.7	1.1	1.5	1	0	0	0
Tb927.5.2870	hypothetical protein	ZUnknown	#N/A	#N/A	#N/A	#N/A	#N/A	#N/A	#N/A	#N/A	#N/A	#N/A	0.9	1	0.7	0.5	0	1	0	0
Tb927.1.2420	hypothetical protein	ZUnknown	#N/A	#N/A	#N/A	#N/A	#N/A	#N/A	#N/A	#N/A	#N/A	#N/A	0.9	0.5	1	0.8	0	1	0	0
Tb927.11.11420	hypothetical protein	ZUnknown	#N/A	#N/A	#N/A	#N/A	#N/A	#N/A	#N/A	#N/A	#N/A	#N/A	1.1	0.5	1	1	0	1	0	0
Tb927.5.2000	hypothetical protein copurifies with MKT1	ZUnknown	#N/A	#N/A	#N/A	#N/A	#N/A	#N/A	#N/A	#N/A	#N/A	#N/A	1.1	1	0.7	0.5	0	1	0	0
Tb927.4.4810	hypothetical protein, conserved	ZUnknown	#N/A	#N/A	#N/A	frameshift_variant	#N/A	#N/A	#N/A	#N/A	#N/A	#N/A	1	2.3	1	1.2	1	0	0	0
Tb927.5.480	hypothetical protein, conserved	ZUnknown	#N/A	#N/A	#N/A	#N/A	#N/A	#N/A	#N/A	disruptive_inframe_insertion	#N/A	#N/A	0.8	3	0.6	0.9	1	0	0	0
Tb927.5.3180	hypothetical protein, conserved	ZUnknown	#N/A	#N/A	#N/A	#N/A	#N/A	#N/A	#N/A	#N/A	#N/A	#N/A	0.9	1.5	0.7	0.7	1	0	0	0
Tb927.5.1230	hypothetical protein, conserved	ZUnknown	#N/A	#N/A	#N/A	#N/A	#N/A	#N/A	#N/A	#N/A	#N/A	#N/A	0.9	1.5	0.7	0.7	1	0	0	0
Tb927.5.4370	hypothetical protein, conserved	ZUnknown	#N/A	#N/A	#N/A	#N/A	#N/A	#N/A	#N/A	#N/A	#N/A	#N/A	1.8	1.5	1.2	0.7	1	0	0	0
Tb927.5.2480	hypothetical protein, conserved	ZUnknown	#N/A	#N/A	#N/A	#N/A	#N/A	#N/A	#N/A	#N/A	#N/A	#N/A	1	1.8	0.6	0.8	1	0	0	0
Tb927.5.1620	hypothetical protein, conserved	ZUnknown	#N/A	#N/A	#N/A	#N/A	#N/A	#N/A	#N/A	#N/A	#N/A	#N/A	1	1.6	0.6	0.8	1	0	0	0
Tb927.5.2390	hypothetical protein, conserved	ZUnknown	#N/A	#N/A	#N/A	#N/A	#N/A	#N/A	#N/A	#N/A	#N/A	#N/A	0.9	1.6	0.6	0.8	1	0	0	0
Tb927.10.2200	hypothetical protein, conserved	ZUnknown	#N/A	#N/A	#N/A	#N/A	#N/A	#N/A	#N/A	#N/A	#N/A	#N/A	0.9	1.5	0.9	0.8	1	0	0	0
Tb927.5.4400	hypothetical protein, conserved	ZUnknown	#N/A	#N/A	#N/A	#N/A	#N/A	#N/A	#N/A	#N/A	#N/A	#N/A	1.5	0.7	1	0.8	1	0	0	0
Tb927.5.4360	hypothetical protein, conserved	ZUnknown	#N/A	#N/A	#N/A	#N/A	#N/A	#N/A	#N/A	#N/A	#N/A	#N/A	1.4	1.6	1.1	0.8	1	0	0	0
Tb927.5.1840	hypothetical protein, conserved	ZUnknown	#N/A	#N/A	#N/A	#N/A	#N/A	#N/A	#N/A	#N/A	#N/A	#N/A	0.9	1.8	0.6	0.9	1	0	0	0
Tb927.11.13270	hypothetical protein, conserved	ZUnknown	#N/A	#N/A	#N/A	#N/A	#N/A	#N/A	#N/A	#N/A	#N/A	#N/A	1	1.5	0.9	0.9	1	0	0	0
Tb927.3.3950	hypothetical protein, conserved	ZUnknown	#N/A	#N/A	#N/A	#N/A	#N/A	#N/A	#N/A	#N/A	#N/A	#N/A	1.1	1.7	1	0.9	1	0	0	0
Tb927.10.3910	hypothetical protein, conserved	ZUnknown	#N/A	#N/A	#N/A	#N/A	#N/A	#N/A	#N/A	#N/A	#N/A	#N/A	1	1.5	1	0.9	1	0	0	0
Tb927.4.2980	hypothetical protein, conserved	ZUnknown	#N/A	#N/A	#N/A	#N/A	#N/A	#N/A	#N/A	#N/A	#N/A	#N/A	0.9	1.5	1	0.9	1	0	0	0
Tb927.1.2730	hypothetical protein, conserved	ZUnknown	#N/A	#N/A	#N/A	#N/A	#N/A	#N/A	#N/A	#N/A	#N/A	#N/A	1.1	1.9	1.1	0.9	1	0	0	0
Tb927.2.4750	hypothetical protein, conserved	ZUnknown	#N/A	#N/A	#N/A	#N/A	#N/A	#N/A	#N/A	#N/A	#N/A	#N/A	1	1.5	1.1	0.9	1	0	0	0
Tb927.5.740	hypothetical protein, conserved	ZUnknown	#N/A	#N/A	#N/A	#N/A	#N/A	#N/A	#N/A	#N/A	#N/A	#N/A	1	1.5	0.6	1	1	0	0	0
Tb927.5.2840	hypothetical protein, conserved	ZUnknown	#N/A	#N/A	#N/A	#N/A	#N/A	#N/A	#N/A	#N/A	#N/A	#N/A	1	1.7	0.7	1	1	0	0	0
Tb927.2.4650	hypothetical protein, conserved	ZUnknown	#N/A	#N/A	#N/A	#N/A	#N/A	#N/A	#N/A	#N/A	#N/A	#N/A	0.8	1.5	0.8	1	1	0	0	0
Tb927.4.1650	hypothetical protein, conserved	ZUnknown	#N/A	#N/A	#N/A	#N/A	#N/A	#N/A	#N/A	#N/A	#N/A	#N/A	0.9	1.7	0.9	1	1	0	0	0
Tb927.11.12070	hypothetical protein, conserved	ZUnknown	#N/A	#N/A	#N/A	#N/A	#N/A	#N/A	#N/A	#N/A	#N/A	#N/A	0.8	1.7	0.9	1	1	0	0	0
Tb927.1.4680	hypothetical protein, conserved	ZUnknown	#N/A	#N/A	#N/A	#N/A	#N/A	#N/A	#N/A	#N/A	#N/A	#N/A	0.9	1.5	0.9	1	1	0	0	0
Tb927.6.3170	hypothetical protein, conserved	ZUnknown	#N/A	#N/A	#N/A	#N/A	#N/A	#N/A	#N/A	#N/A	#N/A	#N/A	1	2.1	1	1	1	0	0	0
Tb927.11.16350	hypothetical protein, conserved	ZUnknown	#N/A	#N/A	#N/A	#N/A	#N/A	#N/A	#N/A	#N/A	#N/A	#N/A	1	2	1	1	1	0	0	0
Tb927.11.15540	hypothetical protein, conserved	ZUnknown	#N/A	#N/A	#N/A	#N/A	#N/A	#N/A	#N/A	#N/A	#N/A	#N/A	1	1.9	1	1	1	0	0	0
Tb927.1.4040	hypothetical protein, conserved	ZUnknown	#N/A	#N/A	#N/A	#N/A	#N/A	#N/A	#N/A	#N/A	#N/A	#N/A	0.9	1.9	1	1	1	0	0	0
Tb927.10.820	hypothetical protein, conserved	ZUnknown	#N/A	#N/A	#N/A	#N/A	#N/A	#N/A	#N/A	#N/A	#N/A	#N/A	0.9	1.7	1	1	1	0	0	0
Tb927.11.1720	hypothetical protein, conserved	ZUnknown	#N/A	#N/A	#N/A	#N/A	#N/A	#N/A	#N/A	#N/A	#N/A	#N/A	1	1.6	1	1	1	0	0	0
Tb927.1.2750	hypothetical protein, conserved	ZUnknown	#N/A	#N/A	#N/A	#N/A	#N/A	#N/A	#N/A	#N/A	#N/A	#N/A	0.9	1.6	1	1	1	0	0	0
Tb927.8.4670	hypothetical protein, conserved	ZUnknown	#N/A	#N/A	#N/A	#N/A	#N/A	#N/A	#N/A	#N/A	#N/A	#N/A	0.9	1.6	1	1	1	0	0	0
Tb927.3.4580	hypothetical protein, conserved	ZUnknown	#N/A	#N/A	#N/A	#N/A	#N/A	#N/A	#N/A	#N/A	#N/A	#N/A	1	1.5	1	1	1	0	0	0
Tb927.10.9220	hypothetical protein, conserved	ZUnknown	#N/A	#N/A	#N/A	#N/A	#N/A	#N/A	#N/A	#N/A	#N/A	#N/A	0.9	1.5	1	1	1	0	0	0
Tb927.10.15040	hypothetical protein, conserved	ZUnknown	#N/A	#N/A	#N/A	#N/A	#N/A	#N/A	#N/A	#N/A	#N/A	#N/A	0.9	1.5	1	1	1	0	0	0
Tb927.5.4130	hypothetical protein, conserved	ZUnknown	#N/A	#N/A	#N/A	#N/A	#N/A	#N/A	#N/A	#N/A	#N/A	#N/A	1.6	1	1	1	1	0	0	0
Tb927.5.3660	hypothetical protein, conserved	ZUnknown	#N/A	#N/A	#N/A	#N/A	#N/A	#N/A	#N/A	#N/A	#N/A	#N/A	1.5	1	1	1	1	0	0	0
Tb927.11.16820	hypothetical protein, conserved	ZUnknown	#N/A	#N/A	#N/A	#N/A	#N/A	#N/A	#N/A	#N/A	#N/A	#N/A	0.9	2	1.1	1	1	0	0	0
Tb927.10.4790	hypothetical protein, conserved	ZUnknown	#N/A	#N/A	#N/A	#N/A	#N/A	#N/A	#N/A	#N/A	#N/A	#N/A	0.9	1.6	1.1	1	1	0	0	0
Tb927.6.3190	hypothetical protein, conserved	ZUnknown	#N/A	#N/A	#N/A	#N/A	#N/A	#N/A	#N/A	#N/A	#N/A	#N/A	1	1.5	1.1	1	1	0	0	0
Tb927.5.4290	hypothetical protein, conserved	ZUnknown	#N/A	#N/A	#N/A	#N/A	#N/A	#N/A	#N/A	#N/A	#N/A	#N/A	1.6	0.9	1.1	1	1	0	0	0
Tb927.8.6570	hypothetical protein, conserved	ZUnknown	#N/A	#N/A	#N/A	#N/A	#N/A	#N/A	#N/A	#N/A	#N/A	#N/A	0.9	2.2	0.8	1.1	1	0	0	0
Tb927.3.5210	hypothetical protein, conserved	ZUnknown	#N/A	#N/A	#N/A	#N/A	#N/A	#N/A	#N/A	#N/A	#N/A	#N/A	1	2	0.9	1.1	1	0	0	0
Tb927.8.3390	hypothetical protein, conserved	ZUnknown	#N/A	#N/A	#N/A	#N/A	#N/A	#N/A	#N/A	#N/A	#N/A	#N/A	0.9	1.8	0.9	1.1	1	0	0	0
Tb927.1.2700	hypothetical protein, conserved	ZUnknown	#N/A	#N/A	#N/A	#N/A	#N/A	#N/A	#N/A	#N/A	#N/A	#N/A	0.9	1.7	0.9	1.1	1	0	0	0
Tb927.8.5940	hypothetical protein, conserved	ZUnknown	#N/A	#N/A	#N/A	#N/A	#N/A	#N/A	#N/A	#N/A	#N/A	#N/A	0.9	1.7	0.9	1.1	1	0	0	0
Tb927.11.2240	hypothetical protein, conserved	ZUnknown	#N/A	#N/A	#N/A	#N/A	#N/A	#N/A	#N/A	#N/A	#N/A	#N/A	1.1	1.6	0.9	1.1	1	0	0	0
Tb927.11.4040	hypothetical protein, conserved	ZUnknown	#N/A	#N/A	#N/A	#N/A	#N/A	#N/A	#N/A	#N/A	#N/A	#N/A	0.9	1.5	0.9	1.1	1	0	0	0
Tb927.9.14130	hypothetical protein, conserved	ZUnknown	#N/A	#N/A	#N/A	#N/A	#N/A	#N/A	#N/A	#N/A	#N/A	#N/A	1	2	1	1.1	1	0	0	0
Tb927.7.4210	hypothetical protein, conserved	ZUnknown	#N/A	#N/A	#N/A	#N/A	#N/A	#N/A	#N/A	#N/A	#N/A	#N/A	0.9	1.9	1	1.1	1	0	0	0
Tb927.6.5060	hypothetical protein, conserved	ZUnknown	#N/A	#N/A	#N/A	#N/A	#N/A	#N/A	#N/A	#N/A	#N/A	#N/A	1.1	1.8	1	1.1	1	0	0	0
Tb927.3.2910	hypothetical protein, conserved	ZUnknown	#N/A	#N/A	#N/A	#N/A	#N/A	#N/A	#N/A	#N/A	#N/A	#N/A	1.1	1.8	1	1.1	1	0	0	0
Tb927.1.4700	hypothetical protein, conserved	ZUnknown	#N/A	#N/A	#N/A	#N/A	#N/A	#N/A	#N/A	#N/A	#N/A	#N/A	0.9	1.8	1	1.1	1	0	0	0
Tb927.2.2270	hypothetical protein, conserved	ZUnknown	#N/A	#N/A	#N/A	#N/A	#N/A	#N/A	#N/A	#N/A	#N/A	#N/A	0.9	1.7	1	1.1	1	0	0	0
Tb927.9.10000	hypothetical protein, conserved	ZUnknown	#N/A	#N/A	#N/A	#N/A	#N/A	#N/A	#N/A	#N/A	#N/A	#N/A	0.9	1.7	1	1.1	1	0	0	0
Tb927.10.610	hypothetical protein, conserved	ZUnknown	#N/A	#N/A	#N/A	#N/A	#N/A	#N/A	#N/A	#N/A	#N/A	#N/A	1	1.6	1	1.1	1	0	0	0
Tb927.10.150	hypothetical protein, conserved	ZUnknown	#N/A	#N/A	#N/A	#N/A	#N/A	#N/A	#N/A	#N/A	#N/A	#N/A	1	1.6	1	1.1	1	0	0	0
Tb927.8.3440	hypothetical protein, conserved	ZUnknown	#N/A	#N/A	#N/A	#N/A	#N/A	#N/A	#N/A	#N/A	#N/A	#N/A	0.9	1.6	1	1.1	1	0	0	0
Tb927.2.6100	hypothetical protein, conserved	ZUnknown	#N/A	#N/A	#N/A	#N/A	#N/A	#N/A	#N/A	#N/A	#N/A	#N/A	0.9	1.6	1	1.1	1	0	0	0
Tb927.11.1440	hypothetical protein, conserved	ZUnknown	#N/A	#N/A	#N/A	#N/A	#N/A	#N/A	#N/A	#N/A	#N/A	#N/A	1	1.5	1	1.1	1	0	0	0
Tb927.3.1560	hypothetical protein, conserved	ZUnknown	#N/A	#N/A	#N/A	#N/A	#N/A	#N/A	#N/A	#N/A	#N/A	#N/A	1	1.5	1	1.1	1	0	0	0
Tb927.7.6560	hypothetical protein, conserved	ZUnknown	#N/A	#N/A	#N/A	#N/A	#N/A	#N/A	#N/A	#N/A	#N/A	#N/A	0.9	1.5	1	1.1	1	0	0	0
Tb927.11.12870	hypothetical protein, conserved	ZUnknown	#N/A	#N/A	#N/A	#N/A	#N/A	#N/A	#N/A	#N/A	#N/A	#N/A	0.9	1.5	1	1.1	1	0	0	0
Tb927.5.3550	hypothetical protein, conserved	ZUnknown	#N/A	#N/A	#N/A	#N/A	#N/A	#N/A	#N/A	#N/A	#N/A	#N/A	1.5	1.1	1	1.1	1	0	0	0
Tb927.5.3470	hypothetical protein, conserved	ZUnknown	#N/A	#N/A	#N/A	#N/A	#N/A	#N/A	#N/A	#N/A	#N/A	#N/A	1.5	1.1	1	1.1	1	0	0	0
Tb927.5.3440	hypothetical protein, conserved	ZUnknown	#N/A	#N/A	#N/A	#N/A	#N/A	#N/A	#N/A	#N/A	#N/A	#N/A	1.5	1.1	1	1.1	1	0	0	0
Tb927.5.4110	hypothetical protein, conserved	ZUnknown	#N/A	#N/A	#N/A	#N/A	#N/A	#N/A	#N/A	#N/A	#N/A	#N/A	1.6	1	1	1.1	1	0	0	0
Tb927.5.4470	hypothetical protein, conserved	ZUnknown	#N/A	#N/A	#N/A	#N/A	#N/A	#N/A	#N/A	#N/A	#N/A	#N/A	1.5	1	1	1.1	1	0	0	0
Tb927.7.2610	hypothetical protein, conserved	ZUnknown	#N/A	#N/A	#N/A	#N/A	#N/A	#N/A	#N/A	#N/A	#N/A	#N/A	1.1	1.8	1.1	1.1	1	0	0	0
Tb927.11.13450	hypothetical protein, conserved	ZUnknown	#N/A	#N/A	#N/A	#N/A	#N/A	#N/A	#N/A	#N/A	#N/A	#N/A	1	1.6	1.1	1.1	1	0	0	0
Tb927.11.1750	hypothetical protein, conserved	ZUnknown	#N/A	#N/A	#N/A	#N/A	#N/A	#N/A	#N/A	#N/A	#N/A	#N/A	1.1	1.5	1.1	1.1	1	0	0	0
Tb927.6.4330	hypothetical protein, conserved	ZUnknown	#N/A	#N/A	#N/A	#N/A	#N/A	#N/A	#N/A	#N/A	#N/A	#N/A	1.1	1.6	1.2	1.1	1	0	0	0
Tb927.6.3910	hypothetical protein, conserved	ZUnknown	#N/A	#N/A	#N/A	#N/A	#N/A	#N/A	#N/A	#N/A	#N/A	#N/A	0.8	1.8	0.7	1.2	1	0	0	0
Tb927.6.2590	hypothetical protein, conserved	ZUnknown	#N/A	#N/A	#N/A	#N/A	#N/A	#N/A	#N/A	#N/A	#N/A	#N/A	0.9	2.1	0.8	1.2	1	0	0	0
Tb927.4.2960	hypothetical protein, conserved	ZUnknown	#N/A	#N/A	#N/A	#N/A	#N/A	#N/A	#N/A	#N/A	#N/A	#N/A	1.1	1.7	0.8	1.2	1	0	0	0
Tb927.11.7850	hypothetical protein, conserved	ZUnknown	#N/A	#N/A	#N/A	#N/A	#N/A	#N/A	#N/A	#N/A	#N/A	#N/A	0.8	2.3	0.9	1.2	1	0	0	0
Tb927.9.14100	hypothetical protein, conserved	ZUnknown	#N/A	#N/A	#N/A	#N/A	#N/A	#N/A	#N/A	#N/A	#N/A	#N/A	0.9	2.1	0.9	1.2	1	0	0	0
Tb927.6.1220	hypothetical protein, conserved	ZUnknown	#N/A	#N/A	#N/A	#N/A	#N/A	#N/A	#N/A	#N/A	#N/A	#N/A	0.9	1.7	0.9	1.2	1	0	0	0
Tb927.4.1000	hypothetical protein, conserved	ZUnknown	#N/A	#N/A	#N/A	#N/A	#N/A	#N/A	#N/A	#N/A	#N/A	#N/A	0.9	1.7	0.9	1.2	1	0	0	0
Tb927.10.6820	hypothetical protein, conserved	ZUnknown	#N/A	#N/A	#N/A	#N/A	#N/A	#N/A	#N/A	#N/A	#N/A	#N/A	1	1.6	0.9	1.2	1	0	0	0
Tb927.10.8860	hypothetical protein, conserved	ZUnknown	#N/A	#N/A	#N/A	#N/A	#N/A	#N/A	#N/A	#N/A	#N/A	#N/A	0.9	1.6	0.9	1.2	1	0	0	0
Tb927.10.4530	hypothetical protein, conserved	ZUnknown	#N/A	#N/A	#N/A	#N/A	#N/A	#N/A	#N/A	#N/A	#N/A	#N/A	0.9	1.6	0.9	1.2	1	0	0	0
Tb927.7.5840	hypothetical protein, conserved	ZUnknown	#N/A	#N/A	#N/A	#N/A	#N/A	#N/A	#N/A	#N/A	#N/A	#N/A	0.9	1.6	0.9	1.2	1	0	0	0
Tb927.2.4670	hypothetical protein, conserved	ZUnknown	#N/A	#N/A	#N/A	#N/A	#N/A	#N/A	#N/A	#N/A	#N/A	#N/A	0.9	1.6	0.9	1.2	1	0	0	0
Tb927.10.410	hypothetical protein, conserved	ZUnknown	#N/A	#N/A	#N/A	#N/A	#N/A	#N/A	#N/A	#N/A	#N/A	#N/A	0.8	1.6	0.9	1.2	1	0	0	0
Tb927.3.2990	hypothetical protein, conserved	ZUnknown	#N/A	#N/A	#N/A	#N/A	#N/A	#N/A	#N/A	#N/A	#N/A	#N/A	0.9	1.5	0.9	1.2	1	0	0	0
Tb927.3.5190	hypothetical protein, conserved	ZUnknown	#N/A	#N/A	#N/A	#N/A	#N/A	#N/A	#N/A	#N/A	#N/A	#N/A	0.8	1.5	0.9	1.2	1	0	0	0
Tb927.5.3840	hypothetical protein, conserved	ZUnknown	#N/A	#N/A	#N/A	#N/A	#N/A	#N/A	#N/A	#N/A	#N/A	#N/A	1.5	1.3	0.9	1.2	1	0	0	0
Tb927.3.3880	hypothetical protein, conserved	ZUnknown	#N/A	#N/A	#N/A	#N/A	#N/A	#N/A	#N/A	#N/A	#N/A	#N/A	1.1	1.8	1	1.2	1	0	0	0
Tb927.9.9270	hypothetical protein, conserved	ZUnknown	#N/A	#N/A	#N/A	#N/A	#N/A	#N/A	#N/A	#N/A	#N/A	#N/A	1.1	1.8	1	1.2	1	0	0	0
Tb927.11.160	hypothetical protein, conserved	ZUnknown	#N/A	#N/A	#N/A	#N/A	#N/A	#N/A	#N/A	#N/A	#N/A	#N/A	1	1.8	1	1.2	1	0	0	0
Tb927.10.10070	hypothetical protein, conserved	ZUnknown	#N/A	#N/A	#N/A	#N/A	#N/A	#N/A	#N/A	#N/A	#N/A	#N/A	0.9	1.8	1	1.2	1	0	0	0
Tb927.11.8430	hypothetical protein, conserved	ZUnknown	#N/A	#N/A	#N/A	#N/A	#N/A	#N/A	#N/A	#N/A	#N/A	#N/A	0.9	1.8	1	1.2	1	0	0	0
Tb927.11.2080	hypothetical protein, conserved	ZUnknown	#N/A	#N/A	#N/A	#N/A	#N/A	#N/A	#N/A	#N/A	#N/A	#N/A	1	1.7	1	1.2	1	0	0	0
Tb927.11.770	hypothetical protein, conserved	ZUnknown	#N/A	#N/A	#N/A	#N/A	#N/A	#N/A	#N/A	#N/A	#N/A	#N/A	1	1.7	1	1.2	1	0	0	0
Tb927.1.4410	hypothetical protein, conserved	ZUnknown	#N/A	#N/A	#N/A	#N/A	#N/A	#N/A	#N/A	#N/A	#N/A	#N/A	0.9	1.6	1	1.2	1	0	0	0
Tb927.4.5210	hypothetical protein, conserved	ZUnknown	#N/A	#N/A	#N/A	#N/A	#N/A	#N/A	#N/A	#N/A	#N/A	#N/A	1.1	1.5	1	1.2	1	0	0	0
Tb927.7.2560	hypothetical protein, conserved	ZUnknown	#N/A	#N/A	#N/A	#N/A	#N/A	#N/A	#N/A	#N/A	#N/A	#N/A	1	1.5	1	1.2	1	0	0	0
Tb927.7.5850	hypothetical protein, conserved	ZUnknown	#N/A	#N/A	#N/A	#N/A	#N/A	#N/A	#N/A	#N/A	#N/A	#N/A	1	1.5	1	1.2	1	0	0	0
Tb927.9.9420	hypothetical protein, conserved	ZUnknown	#N/A	#N/A	#N/A	#N/A	#N/A	#N/A	#N/A	#N/A	#N/A	#N/A	1	1.5	1	1.2	1	0	0	0
Tb927.7.2380	hypothetical protein, conserved	ZUnknown	#N/A	#N/A	#N/A	#N/A	#N/A	#N/A	#N/A	#N/A	#N/A	#N/A	1	1.5	1	1.2	1	0	0	0
Tb927.10.13140	hypothetical protein, conserved	ZUnknown	#N/A	#N/A	#N/A	#N/A	#N/A	#N/A	#N/A	#N/A	#N/A	#N/A	0.9	1.5	1	1.2	1	0	0	0
Tb927.5.3880	hypothetical protein, conserved	ZUnknown	#N/A	#N/A	#N/A	#N/A	#N/A	#N/A	#N/A	#N/A	#N/A	#N/A	1.5	1	1	1.2	1	0	0	0
Tb927.7.6210	hypothetical protein, conserved	ZUnknown	#N/A	#N/A	#N/A	#N/A	#N/A	#N/A	#N/A	#N/A	#N/A	#N/A	0.9	2	1.1	1.2	1	0	0	0
Tb927.7.4010	hypothetical protein, conserved	ZUnknown	#N/A	#N/A	#N/A	#N/A	#N/A	#N/A	#N/A	#N/A	#N/A	#N/A	1.1	1.9	1.1	1.2	1	0	0	0
Tb927.11.7800	hypothetical protein, conserved	ZUnknown	#N/A	#N/A	#N/A	#N/A	#N/A	#N/A	#N/A	#N/A	#N/A	#N/A	1.1	1.9	1.1	1.2	1	0	0	0
Tb927.9.8650	hypothetical protein, conserved	ZUnknown	#N/A	#N/A	#N/A	#N/A	#N/A	#N/A	#N/A	#N/A	#N/A	#N/A	1	1.9	1.1	1.2	1	0	0	0
Tb927.10.3160	hypothetical protein, conserved	ZUnknown	#N/A	#N/A	#N/A	#N/A	#N/A	#N/A	#N/A	#N/A	#N/A	#N/A	1.1	1.7	1.1	1.2	1	0	0	0
Tb927.9.9430	hypothetical protein, conserved	ZUnknown	#N/A	#N/A	#N/A	#N/A	#N/A	#N/A	#N/A	#N/A	#N/A	#N/A	1.1	1.6	1.1	1.2	1	0	0	0
Tb927.7.2450	hypothetical protein, conserved	ZUnknown	#N/A	#N/A	#N/A	#N/A	#N/A	#N/A	#N/A	#N/A	#N/A	#N/A	1	1.6	1.1	1.2	1	0	0	0
Tb927.6.4160	hypothetical protein, conserved	ZUnknown	#N/A	#N/A	#N/A	#N/A	#N/A	#N/A	#N/A	#N/A	#N/A	#N/A	1	1.6	1.1	1.2	1	0	0	0
Tb927.11.13570	hypothetical protein, conserved	ZUnknown	#N/A	#N/A	#N/A	#N/A	#N/A	#N/A	#N/A	#N/A	#N/A	#N/A	0.9	1.6	1.1	1.2	1	0	0	0
Tb927.11.1770	hypothetical protein, conserved	ZUnknown	#N/A	#N/A	#N/A	#N/A	#N/A	#N/A	#N/A	#N/A	#N/A	#N/A	1.1	1.5	1.1	1.2	1	0	0	0
Tb927.10.10740	hypothetical protein, conserved	ZUnknown	#N/A	#N/A	#N/A	#N/A	#N/A	#N/A	#N/A	#N/A	#N/A	#N/A	1	1.5	1.1	1.2	1	0	0	0
Tb927.11.14050	hypothetical protein, conserved	ZUnknown	#N/A	#N/A	#N/A	#N/A	#N/A	#N/A	#N/A	#N/A	#N/A	#N/A	0.9	1.5	1.1	1.2	1	0	0	0
Tb927.2.2390	hypothetical protein, conserved	ZUnknown	#N/A	#N/A	#N/A	#N/A	#N/A	#N/A	#N/A	#N/A	#N/A	#N/A	1	1.5	1.2	1.2	1	0	0	0
Tb927.7.2210	hypothetical protein, conserved	ZUnknown	#N/A	#N/A	#N/A	#N/A	#N/A	#N/A	#N/A	#N/A	#N/A	#N/A	0.8	2.1	0.7	1.3	1	0	0	0
Tb927.3.2380	hypothetical protein, conserved	ZUnknown	#N/A	#N/A	#N/A	#N/A	#N/A	#N/A	#N/A	#N/A	#N/A	#N/A	0.7	1.5	0.7	1.3	1	0	0	0
Tb927.2.4445	hypothetical protein, conserved	ZUnknown	#N/A	#N/A	#N/A	#N/A	#N/A	#N/A	#N/A	#N/A	#N/A	#N/A	0.8	2.2	0.8	1.3	1	0	0	0
Tb927.11.13300	hypothetical protein, conserved	ZUnknown	#N/A	#N/A	#N/A	#N/A	#N/A	#N/A	#N/A	#N/A	#N/A	#N/A	0.9	1.6	0.8	1.3	1	0	0	0
Tb927.5.4450	hypothetical protein, conserved	ZUnknown	#N/A	#N/A	#N/A	#N/A	#N/A	#N/A	#N/A	#N/A	#N/A	#N/A	1.5	2	0.9	1.3	1	0	0	0
Tb927.4.2660	hypothetical protein, conserved	ZUnknown	#N/A	#N/A	#N/A	#N/A	#N/A	#N/A	#N/A	#N/A	#N/A	#N/A	0.9	1.8	0.9	1.3	1	0	0	0
Tb927.2.2830	hypothetical protein, conserved	ZUnknown	#N/A	#N/A	#N/A	#N/A	#N/A	#N/A	#N/A	#N/A	#N/A	#N/A	0.9	1.7	0.9	1.3	1	0	0	0
Tb927.11.15340	hypothetical protein, conserved	ZUnknown	#N/A	#N/A	#N/A	#N/A	#N/A	#N/A	#N/A	#N/A	#N/A	#N/A	0.9	1.5	0.9	1.3	1	0	0	0
Tb927.8.2190	hypothetical protein, conserved	ZUnknown	#N/A	#N/A	#N/A	#N/A	#N/A	#N/A	#N/A	#N/A	#N/A	#N/A	0.9	1.5	0.9	1.3	1	0	0	0
Tb927.10.5000	hypothetical protein, conserved	ZUnknown	#N/A	#N/A	#N/A	#N/A	#N/A	#N/A	#N/A	#N/A	#N/A	#N/A	0.9	1.5	0.9	1.3	1	0	0	0
Tb927.6.3990	hypothetical protein, conserved	ZUnknown	#N/A	#N/A	#N/A	#N/A	#N/A	#N/A	#N/A	#N/A	#N/A	#N/A	1	2.2	1	1.3	1	0	0	0
Tb927.8.2170	hypothetical protein, conserved	ZUnknown	#N/A	#N/A	#N/A	#N/A	#N/A	#N/A	#N/A	#N/A	#N/A	#N/A	0.9	1.8	1	1.3	1	0	0	0
Tb927.11.16650	hypothetical protein, conserved	ZUnknown	#N/A	#N/A	#N/A	#N/A	#N/A	#N/A	#N/A	#N/A	#N/A	#N/A	0.9	1.8	1	1.3	1	0	0	0
Tb927.7.4360	hypothetical protein, conserved	ZUnknown	#N/A	#N/A	#N/A	#N/A	#N/A	#N/A	#N/A	#N/A	#N/A	#N/A	1.1	1.6	1	1.3	1	0	0	0
Tb927.2.2910	hypothetical protein, conserved	ZUnknown	#N/A	#N/A	#N/A	#N/A	#N/A	#N/A	#N/A	#N/A	#N/A	#N/A	0.9	1.6	1	1.3	1	0	0	0
Tb927.8.5870	hypothetical protein, conserved	ZUnknown	#N/A	#N/A	#N/A	#N/A	#N/A	#N/A	#N/A	#N/A	#N/A	#N/A	1	1.5	1	1.3	1	0	0	0
Tb927.10.2330	hypothetical protein, conserved	ZUnknown	#N/A	#N/A	#N/A	#N/A	#N/A	#N/A	#N/A	#N/A	#N/A	#N/A	1	2.1	1.1	1.3	1	0	0	0
Tb927.4.2530	hypothetical protein, conserved	ZUnknown	#N/A	#N/A	#N/A	#N/A	#N/A	#N/A	#N/A	#N/A	#N/A	#N/A	1	1.5	1.1	1.3	1	0	0	0
Tb927.1.110	hypothetical protein, conserved	ZUnknown	#N/A	#N/A	#N/A	#N/A	#N/A	#N/A	#N/A	#N/A	#N/A	#N/A	1.5	2.1	1.2	1.3	1	0	0	0
Tb927.4.2420	hypothetical protein, conserved	ZUnknown	#N/A	#N/A	#N/A	#N/A	#N/A	#N/A	#N/A	#N/A	#N/A	#N/A	1.3	2	1.4	1.3	1	0	0	0
Tb927.9.9260	hypothetical protein, conserved	ZUnknown	#N/A	#N/A	#N/A	#N/A	#N/A	#N/A	#N/A	#N/A	#N/A	#N/A	1	1.7	0.8	1.4	1	0	0	0
Tb927.4.1040	hypothetical protein, conserved	ZUnknown	#N/A	#N/A	#N/A	#N/A	#N/A	#N/A	#N/A	#N/A	#N/A	#N/A	0.9	1.5	0.8	1.4	1	0	0	0
Tb927.10.440	hypothetical protein, conserved	ZUnknown	#N/A	#N/A	#N/A	#N/A	#N/A	#N/A	#N/A	#N/A	#N/A	#N/A	0.9	1.5	0.8	1.4	1	0	0	0
Tb927.6.1710	hypothetical protein, conserved	ZUnknown	#N/A	#N/A	#N/A	#N/A	#N/A	#N/A	#N/A	#N/A	#N/A	#N/A	0.8	1.5	0.8	1.4	1	0	0	0
Tb927.10.6390	hypothetical protein, conserved	ZUnknown	#N/A	#N/A	#N/A	#N/A	#N/A	#N/A	#N/A	#N/A	#N/A	#N/A	0.9	2.4	0.9	1.4	1	0	0	0
Tb927.2.5080	hypothetical protein, conserved	ZUnknown	#N/A	#N/A	#N/A	#N/A	#N/A	#N/A	#N/A	#N/A	#N/A	#N/A	0.8	2.2	0.9	1.4	1	0	0	0
Tb927.11.5080	hypothetical protein, conserved	ZUnknown	#N/A	#N/A	#N/A	#N/A	#N/A	#N/A	#N/A	#N/A	#N/A	#N/A	1	2.1	0.9	1.4	1	0	0	0
Tb927.8.4520	hypothetical protein, conserved	ZUnknown	#N/A	#N/A	#N/A	#N/A	#N/A	#N/A	#N/A	#N/A	#N/A	#N/A	0.8	1.9	0.9	1.4	1	0	0	0
Tb927.10.12010	hypothetical protein, conserved	ZUnknown	#N/A	#N/A	#N/A	#N/A	#N/A	#N/A	#N/A	#N/A	#N/A	#N/A	1.2	1.8	0.9	1.4	1	0	0	0
Tb927.9.9230	hypothetical protein, conserved	ZUnknown	#N/A	#N/A	#N/A	#N/A	#N/A	#N/A	#N/A	#N/A	#N/A	#N/A	0.9	1.5	0.9	1.4	1	0	0	0
Tb927.9.3030	hypothetical protein, conserved	ZUnknown	#N/A	#N/A	#N/A	#N/A	#N/A	#N/A	#N/A	#N/A	#N/A	#N/A	1	2.1	1	1.4	1	0	0	0
Tb927.10.1650	hypothetical protein, conserved	ZUnknown	#N/A	#N/A	#N/A	#N/A	#N/A	#N/A	#N/A	#N/A	#N/A	#N/A	0.9	1.8	1	1.4	1	0	0	0
Tb927.7.6490	hypothetical protein, conserved	ZUnknown	#N/A	#N/A	#N/A	#N/A	#N/A	#N/A	#N/A	#N/A	#N/A	#N/A	0.8	1.7	1	1.4	1	0	0	0
Tb927.10.9170	hypothetical protein, conserved	ZUnknown	#N/A	#N/A	#N/A	#N/A	#N/A	#N/A	#N/A	#N/A	#N/A	#N/A	1	1.5	1	1.4	1	0	0	0
Tb927.6.2160	hypothetical protein, conserved	ZUnknown	#N/A	#N/A	#N/A	#N/A	#N/A	#N/A	#N/A	#N/A	#N/A	#N/A	0.9	1.5	1	1.4	1	0	0	0
Tb927.10.8260	hypothetical protein, conserved	ZUnknown	#N/A	#N/A	#N/A	#N/A	#N/A	#N/A	#N/A	#N/A	#N/A	#N/A	0.9	1.5	1	1.4	1	0	0	0
Tb927.8.1120	hypothetical protein, conserved	ZUnknown	#N/A	#N/A	#N/A	#N/A	#N/A	#N/A	#N/A	#N/A	#N/A	#N/A	1.1	1.9	1.1	1.4	1	0	0	0
Tb927.10.5800	hypothetical protein, conserved	ZUnknown	#N/A	#N/A	#N/A	#N/A	#N/A	#N/A	#N/A	#N/A	#N/A	#N/A	0.9	1.9	1.1	1.4	1	0	0	0
Tb927.9.2280	hypothetical protein, conserved	ZUnknown	#N/A	#N/A	#N/A	#N/A	#N/A	#N/A	#N/A	#N/A	#N/A	#N/A	0.9	1.8	1.1	1.4	1	0	0	0
Tb927.1.1040	hypothetical protein, conserved	ZUnknown	#N/A	#N/A	#N/A	#N/A	#N/A	#N/A	#N/A	#N/A	#N/A	#N/A	1	1.6	1.1	1.4	1	0	0	0
Tb927.7.4680	hypothetical protein, conserved	ZUnknown	#N/A	#N/A	#N/A	#N/A	#N/A	#N/A	#N/A	#N/A	#N/A	#N/A	1.2	1.5	1.1	1.4	1	0	0	0
Tb927.5.4510	hypothetical protein, conserved	ZUnknown	#N/A	#N/A	#N/A	#N/A	#N/A	#N/A	#N/A	#N/A	#N/A	#N/A	1.6	1.1	1.1	1.4	1	0	0	0
Tb927.3.5470	hypothetical protein, conserved	ZUnknown	#N/A	#N/A	#N/A	#N/A	#N/A	#N/A	#N/A	#N/A	#N/A	#N/A	1	2.3	1.2	1.4	1	0	0	0
Tb927.4.2160	hypothetical protein, conserved	ZUnknown	#N/A	#N/A	#N/A	#N/A	#N/A	#N/A	#N/A	#N/A	#N/A	#N/A	1	2.2	1.2	1.4	1	0	0	0
Tb927.7.5010	hypothetical protein, conserved	ZUnknown	#N/A	#N/A	#N/A	#N/A	#N/A	#N/A	#N/A	#N/A	#N/A	#N/A	1.1	1.6	1.2	1.4	1	0	0	0
Tb927.8.6890	hypothetical protein, conserved	ZUnknown	#N/A	#N/A	#N/A	#N/A	#N/A	#N/A	#N/A	#N/A	#N/A	#N/A	1.1	1.6	1.2	1.4	1	0	0	0
Tb927.10.11370	hypothetical protein, conserved	ZUnknown	#N/A	#N/A	#N/A	#N/A	#N/A	#N/A	#N/A	#N/A	#N/A	#N/A	1.1	1.7	1.3	1.4	1	0	0	0
Tb927.4.5080	hypothetical protein, conserved	ZUnknown	#N/A	#N/A	#N/A	#N/A	#N/A	#N/A	#N/A	#N/A	#N/A	#N/A	0.9	1.3	0.8	1.5	1	0	0	0
Tb927.2.3970	hypothetical protein, conserved	ZUnknown	#N/A	#N/A	#N/A	#N/A	#N/A	#N/A	#N/A	#N/A	#N/A	#N/A	1	1.4	0.9	1.5	1	0	0	0
Tb927.6.4790	hypothetical protein, conserved	ZUnknown	#N/A	#N/A	#N/A	#N/A	#N/A	#N/A	#N/A	#N/A	#N/A	#N/A	1	1.4	1	1.5	1	0	0	0
Tb927.9.15020	hypothetical protein, conserved	ZUnknown	#N/A	#N/A	#N/A	#N/A	#N/A	#N/A	#N/A	#N/A	#N/A	#N/A	0.9	1.4	1	1.5	1	0	0	0
Tb927.11.6490	hypothetical protein, conserved	ZUnknown	#N/A	#N/A	#N/A	#N/A	#N/A	#N/A	#N/A	#N/A	#N/A	#N/A	1	1.3	1	1.5	1	0	0	0
Tb927.10.12360	hypothetical protein, conserved	ZUnknown	#N/A	#N/A	#N/A	#N/A	#N/A	#N/A	#N/A	#N/A	#N/A	#N/A	1	1.2	1	1.5	1	0	0	0
Tb927.10.12300	hypothetical protein, conserved	ZUnknown	#N/A	#N/A	#N/A	#N/A	#N/A	#N/A	#N/A	#N/A	#N/A	#N/A	1.1	1.1	1	1.5	1	0	0	0
Tb927.7.260	hypothetical protein, conserved	ZUnknown	#N/A	#N/A	#N/A	#N/A	#N/A	#N/A	#N/A	#N/A	#N/A	#N/A	1.1	1	1	1.5	1	0	0	0
Tb927.11.6190	hypothetical protein, conserved	ZUnknown	#N/A	#N/A	#N/A	#N/A	#N/A	#N/A	#N/A	#N/A	#N/A	#N/A	1	1.4	1.1	1.5	1	0	0	0
Tb927.10.13910	hypothetical protein, conserved	ZUnknown	#N/A	#N/A	#N/A	#N/A	#N/A	#N/A	#N/A	#N/A	#N/A	#N/A	1	1.4	1.1	1.5	1	0	0	0
Tb927.4.1770	hypothetical protein, conserved	ZUnknown	#N/A	#N/A	#N/A	#N/A	#N/A	#N/A	#N/A	#N/A	#N/A	#N/A	1.2	1.3	1.1	1.5	1	0	0	0
Tb927.8.6310	hypothetical protein, conserved	ZUnknown	#N/A	#N/A	#N/A	#N/A	#N/A	#N/A	#N/A	#N/A	#N/A	#N/A	1	0.6	1.1	1.5	1	0	0	0
Tb927.9.10510	hypothetical protein, conserved	ZUnknown	#N/A	#N/A	#N/A	#N/A	#N/A	#N/A	#N/A	#N/A	#N/A	#N/A	1	1.4	1.2	1.5	1	0	0	0
Tb927.10.16060	hypothetical protein, conserved	ZUnknown	#N/A	#N/A	#N/A	#N/A	#N/A	#N/A	#N/A	#N/A	#N/A	#N/A	1.1	1.2	1.2	1.5	1	0	0	0
Tb927.10.4090	hypothetical protein, conserved	ZUnknown	#N/A	#N/A	#N/A	#N/A	#N/A	#N/A	#N/A	#N/A	#N/A	#N/A	0.9	1.1	1.5	1.5	1	0	0	0
Tb927.10.14030	hypothetical protein, conserved	ZUnknown	#N/A	#N/A	#N/A	#N/A	#N/A	#N/A	#N/A	#N/A	#N/A	#N/A	1.2	1.4	0.9	1.6	1	0	0	0
Tb927.10.8380	hypothetical protein, conserved	ZUnknown	#N/A	#N/A	#N/A	#N/A	#N/A	#N/A	#N/A	#N/A	#N/A	#N/A	1.1	1.4	1.1	1.6	1	0	0	0
Tb927.1.890	hypothetical protein, conserved	ZUnknown	#N/A	#N/A	#N/A	#N/A	#N/A	#N/A	#N/A	#N/A	#N/A	#N/A	1	1.1	0.9	1.7	1	0	0	0
Tb927.4.4640	hypothetical protein, conserved	ZUnknown	#N/A	#N/A	#N/A	#N/A	#N/A	#N/A	#N/A	#N/A	#N/A	#N/A	0.9	1.4	1.2	1.8	1	0	0	0
Tb927.10.13340	hypothetical protein, conserved	ZUnknown	#N/A	#N/A	#N/A	#N/A	#N/A	#N/A	#N/A	#N/A	#N/A	#N/A	1	1.3	1	2.2	1	0	0	0
Tb927.3.5720	hypothetical protein, conserved	ZUnknown	#N/A	#N/A	#N/A	#N/A	#N/A	#N/A	#N/A	#N/A	#N/A	#N/A	0	0	0	0	0	1	0	0
Tb927.5.2180	hypothetical protein, conserved	ZUnknown	#N/A	#N/A	#N/A	#N/A	#N/A	#N/A	#N/A	#N/A	#N/A	#N/A	0.9	1.2	0.5	0.4	0	1	0	0
Tb927.5.2360	hypothetical protein, conserved	ZUnknown	#N/A	#N/A	#N/A	#N/A	#N/A	#N/A	#N/A	#N/A	#N/A	#N/A	1	0.7	0.6	0.5	0	1	0	0
Tb927.5.2630	hypothetical protein, conserved	ZUnknown	#N/A	#N/A	#N/A	#N/A	#N/A	#N/A	#N/A	#N/A	#N/A	#N/A	1	1.1	0.7	0.5	0	1	0	0
Tb927.5.1780	hypothetical protein, conserved	ZUnknown	#N/A	#N/A	#N/A	#N/A	#N/A	#N/A	#N/A	#N/A	#N/A	#N/A	1.1	0.9	0.8	0.5	0	1	0	0
Tb927.5.850	hypothetical protein, conserved	ZUnknown	#N/A	#N/A	#N/A	#N/A	#N/A	#N/A	#N/A	#N/A	#N/A	#N/A	1.1	0.8	0.8	0.5	0	1	0	0
Tb927.4.710	hypothetical protein, conserved	ZUnknown	#N/A	#N/A	#N/A	#N/A	#N/A	#N/A	#N/A	#N/A	#N/A	#N/A	0.9	0.5	0.9	0.7	0	1	0	0
Tb927.10.12110	hypothetical protein, conserved	ZUnknown	#N/A	#N/A	#N/A	#N/A	#N/A	#N/A	#N/A	#N/A	#N/A	#N/A	0.9	0.5	0.9	0.7	0	1	0	0
Tb927.11.7440	hypothetical protein, conserved	ZUnknown	#N/A	#N/A	#N/A	#N/A	#N/A	#N/A	#N/A	#N/A	#N/A	#N/A	0.8	0.5	0.9	0.7	0	1	0	0
Tb927.10.10370	hypothetical protein, conserved	ZUnknown	#N/A	#N/A	#N/A	#N/A	#N/A	#N/A	#N/A	#N/A	#N/A	#N/A	1	0.5	1.1	0.7	0	1	0	0
Tb927.10.15140	hypothetical protein, conserved	ZUnknown	#N/A	#N/A	#N/A	#N/A	#N/A	#N/A	#N/A	#N/A	#N/A	#N/A	1	0.5	1.1	0.7	0	1	0	0
Tb927.10.13170	hypothetical protein, conserved	ZUnknown	#N/A	#N/A	#N/A	#N/A	#N/A	#N/A	#N/A	#N/A	#N/A	#N/A	1	0.5	1	0.8	0	1	0	0
Tb927.3.4530	hypothetical protein, conserved	ZUnknown	#N/A	#N/A	#N/A	#N/A	#N/A	#N/A	#N/A	#N/A	#N/A	#N/A	1	0.5	1	0.9	0	1	0	0
Tb927.2.1760	hypothetical protein, conserved	ZUnknown	#N/A	#N/A	#N/A	#N/A	#N/A	#N/A	#N/A	#N/A	#N/A	#N/A	1	0.3	1	1	0	1	0	0
Tb927.10.7480	hypothetical protein, conserved	ZUnknown	#N/A	#N/A	#N/A	#N/A	#N/A	#N/A	#N/A	#N/A	#N/A	#N/A	0.9	0.5	0.9	1.2	0	1	0	0
Tb927.2.2590	hypothetical protein, conserved	ZUnknown	#N/A	#N/A	#N/A	#N/A	#N/A	#N/A	#N/A	#N/A	#N/A	#N/A	1	0.4	1.1	1.2	0	1	0	0
Tb927.11.6440	hypothetical protein, conserved, Bromodomain and poly(Q), often in TAP MS, low similarity to coiled-coil proteins and hook proteins (cytoskeletal linkers)	ZUnknown	#N/A	#N/A	#N/A	#N/A	#N/A	#N/A	#N/A	#N/A	#N/A	#N/A	0.9	1.6	1	0.9	1	0	0	0
Tb927.3.3260	hypothetical protein, conserved, kinetoplastid-specific, poly(E) repeats	ZUnknown	#N/A	#N/A	#N/A	#N/A	#N/A	#N/A	#N/A	#N/A	#N/A	#N/A	1	1.5	1.2	1.1	1	0	0	0
Tb927.5.3490	hypothetical protein, conserved, LRR-RI like domain	ZUnknown	#N/A	#N/A	#N/A	#N/A	#N/A	#N/A	#N/A	#N/A	#N/A	#N/A	1.5	0.6	1	1.1	1	0	0	0
Tb927.5.3460	hypothetical protein, conserved, LysM domain (peptidoglycan binding). trypanosoma-specific	ZUnknown	#N/A	#N/A	#N/A	#N/A	#N/A	#N/A	#N/A	#N/A	#N/A	#N/A	1.5	0.8	1.1	1.1	1	0	0	0
Tb927.6.5070	hypothetical protein, conserved, myosin-like	ZUnknown	#N/A	#N/A	#N/A	#N/A	#N/A	#N/A	#N/A	#N/A	#N/A	#N/A	0.9	1.5	0.8	1.2	1	0	0	0
Tb927.7.7090	hypothetical protein, conserved, no clear yeast or human matches	ZUnknown	#N/A	#N/A	#N/A	#N/A	#N/A	#N/A	#N/A	#N/A	#N/A	#N/A	1	1.9	1	1.1	1	0	0	0
Tb927.3.2940	hypothetical protein, conserved, no clear yeast or human matches	ZUnknown	#N/A	#N/A	#N/A	#N/A	#N/A	#N/A	#N/A	#N/A	#N/A	#N/A	0.9	1.5	1	1.2	1	0	0	0
Tb927.3.5410	hypothetical protein, conserved, no clear yeast or human matches	ZUnknown	#N/A	#N/A	#N/A	#N/A	#N/A	#N/A	#N/A	#N/A	#N/A	#N/A	0.8	2.3	0.8	1.4	1	0	0	0
Tb927.2.2230	hypothetical protein, conserved, no domains, Kineto-specific	ZUnknown	#N/A	#N/A	#N/A	#N/A	#N/A	#N/A	#N/A	#N/A	#N/A	#N/A	1.1	1.6	1.1	1.3	1	0	0	0
Tb927.10.4400	hypothetical protein, conserved, no domains, kinetoplastid specific	ZUnknown	#N/A	#N/A	#N/A	#N/A	#N/A	#N/A	#N/A	#N/A	#N/A	#N/A	1	2.8	0.9	1.4	1	0	0	0
Tb927.11.5960	hypothetical protein, conserved, no domains, no yeast or human match	ZUnknown	#N/A	#N/A	#N/A	#N/A	#N/A	#N/A	#N/A	#N/A	#N/A	#N/A	0.9	1.5	0.8	1.2	1	0	0	0
Tb927.9.13320	hypothetical protein, conserved, no domains, no yeast or human match	ZUnknown	#N/A	#N/A	#N/A	#N/A	#N/A	#N/A	#N/A	#N/A	#N/A	#N/A	0.9	1.7	1	1.3	1	0	0	0
Tb927.1.3310	hypothetical protein, conserved, no human or yeast homologue	ZUnknown	#N/A	#N/A	#N/A	#N/A	#N/A	#N/A	#N/A	#N/A	#N/A	#N/A	0.8	2	1	1.1	1	0	0	0
Tb927.6.1990	hypothetical protein, conserved, no yeast or human match	ZUnknown	#N/A	#N/A	#N/A	#N/A	#N/A	#N/A	#N/A	#N/A	#N/A	#N/A	0.9	1.5	1	1.2	1	0	0	0
Tb927.8.4190	hypothetical protein, conserved, no yeast or human match	ZUnknown	#N/A	#N/A	#N/A	#N/A	#N/A	#N/A	#N/A	#N/A	#N/A	#N/A	1	2.8	0.9	1.3	1	0	0	0
Tb927.9.9550	hypothetical protein, conserved, no yeast or human match	ZUnknown	#N/A	#N/A	#N/A	#N/A	#N/A	#N/A	#N/A	#N/A	#N/A	#N/A	1	1.7	1.1	1.3	1	0	0	0
Tb927.5.1990	hypothetical protein, conserved, poly(Q) tracts	ZUnknown	#N/A	#N/A	#N/A	#N/A	#N/A	inframe_insertion	#N/A	inframe_insertion	#N/A	#N/A	0.9	3.1	0.7	0.9	1	0	0	0
Tb927.5.4150	hypothetical protein, conserved, putative hydrolase type	ZUnknown	#N/A	#N/A	#N/A	#N/A	#N/A	#N/A	#N/A	#N/A	#N/A	#N/A	1.6	0.9	1.1	0.8	1	0	0	0
Tb927.6.4100	hypothetical protein, conserved, resemblance to myosin	ZUnknown	#N/A	#N/A	#N/A	#N/A	#N/A	#N/A	#N/A	#N/A	#N/A	#N/A	1	1.6	1	1.3	1	0	0	0
Tb927.8.5070	hypothetical protein, conserved, Sm-like	ZUnknown	#N/A	#N/A	#N/A	#N/A	#N/A	#N/A	#N/A	#N/A	#N/A	#N/A	1	1.5	1.2	1.4	1	0	0	0
Tb927.5.4520	hypothetical protein, conserved, spectrin repeat, prefoldin domains, P-loop NTP hydrolase, colicin2	ZUnknown	#N/A	#N/A	#N/A	#N/A	#N/A	#N/A	#N/A	#N/A	#N/A	#N/A	1.5	1.6	0.9	1.3	1	0	0	0
Tb927.7.490	hypothetical protein, conserved, trypanosome-specific	ZUnknown	#N/A	#N/A	#N/A	#N/A	#N/A	#N/A	#N/A	#N/A	#N/A	#N/A	0.9	1.7	1	1.2	1	0	0	0
Tb927.5.2620	hypothetical protein, conserved, ubiquitin-like C-terminus, no yeast or human match	ZUnknown	#N/A	#N/A	#N/A	#N/A	#N/A	#N/A	#N/A	#N/A	#N/A	#N/A	1	0.7	0.6	0.4	0	1	0	0
Tb927.2.3400	hypothetical protein, copurified with splicing complex	ZUnknown	#N/A	#N/A	#N/A	#N/A	#N/A	#N/A	#N/A	#N/A	#N/A	#N/A	1	1.6	1	1.2	1	0	0	0
Tb927.7.1890	hypothetical protein, copurified with splicing complex	ZUnknown	#N/A	#N/A	#N/A	#N/A	#N/A	#N/A	#N/A	#N/A	#N/A	#N/A	0.8	1.6	1	1.3	1	0	0	0
Tb927.4.3050	hypothetical protein, has a prim pol domain	ZUnknown	#N/A	#N/A	#N/A	#N/A	#N/A	#N/A	#N/A	#N/A	#N/A	#N/A	0.8	1.6	0.8	1.2	1	0	0	0
Tb927.10.11280	hypothetical protein, T brucei brucei only	ZUnknown	#N/A	#N/A	#N/A	#N/A	#N/A	#N/A	#N/A	#N/A	#N/A	#N/A	1.1	1.5	1.3	1.1	1	0	0	0
Tb927.5.1970	hypothetical protein, T. brucei-specific, no domains	ZUnknown	#N/A	#N/A	#N/A	#N/A	#N/A	#N/A	#N/A	#N/A	#N/A	#N/A	0.9	1	0.7	0.5	0	1	0	0
Tb927.5.410	invariant surface glycoprotein, putative	ZUnknown	#N/A	#N/A	#N/A	#N/A	#N/A	#N/A	#N/A	#N/A	#N/A	#N/A	1	1.7	0.7	0.9	1	0	0	0
Tb927.10.14570	kinesin motor domain containing protein, putative	ZUnknown	#N/A	#N/A	#N/A	#N/A	#N/A	#N/A	#N/A	#N/A	#N/A	#N/A	1	1.5	1.1	1.3	1	0	0	0
Tb927.6.3860	leucyl/phenylalanyl-tRNA protein transferase, putative	ZUnknown	#N/A	#N/A	#N/A	#N/A	#N/A	#N/A	#N/A	#N/A	#N/A	#N/A	0.9	1.5	0.9	1.1	1	0	0	0
Tb927.11.6060	Maf1, binds polIII promoters & represses transcription	ZUnknown	#N/A	#N/A	#N/A	#N/A	#N/A	#N/A	#N/A	#N/A	#N/A	#N/A	0.9	1.5	1.1	1.3	1	0	0	0
Tb927.11.2840	magnesium-dependent phosphatase-1/HAD phosphatase, family IIIC, putative	ZUnknown	#N/A	#N/A	#N/A	#N/A	#N/A	#N/A	#N/A	#N/A	#N/A	#N/A	0.9	1.8	1.1	1.3	1	0	0	0
Tb927.5.2190	META domain/Domain of unknown function (DUF1935), putative	ZUnknown	#N/A	#N/A	#N/A	#N/A	#N/A	#N/A	#N/A	#N/A	#N/A	#N/A	1	1.2	0.5	0.5	0	1	0	0
Tb927.9.11750	methyltransferase domain containing protein, putative	ZUnknown	#N/A	#N/A	#N/A	#N/A	#N/A	#N/A	#N/A	#N/A	#N/A	#N/A	1.1	1.9	1.1	1.4	1	0	0	0
Tb927.5.4060	Nicastrin, putative	ZUnknown	#N/A	#N/A	#N/A	#N/A	#N/A	#N/A	#N/A	#N/A	#N/A	#N/A	1.5	1	1	0.8	1	0	0	0
Tb927.9.13340	Nop53 (60S ribosomal biogenesis), putative	ZUnknown	#N/A	#N/A	#N/A	#N/A	#N/A	#N/A	#N/A	#N/A	#N/A	#N/A	1	2.2	1	1.3	1	0	0	0
Tb927.10.3640	nuclear transmembrane protein, putative (NP)	ZUnknown	#N/A	#N/A	#N/A	#N/A	#N/A	#N/A	#N/A	#N/A	#N/A	#N/A	1	1.7	0.9	1.4	1	0	0	0
Tb927.1.2210	nucleosome assembly protein (NAP), putative	ZUnknown	#N/A	#N/A	#N/A	#N/A	#N/A	#N/A	#N/A	#N/A	#N/A	#N/A	1	2.5	1	1.4	1	0	0	0
Tb927.8.6590	Outer mitochondrial membrane transport complex protein/Glutathione S-transferase, C-terminal domain containing protein, putative	ZUnknown	#N/A	#N/A	#N/A	#N/A	#N/A	#N/A	#N/A	#N/A	#N/A	#N/A	0.9	1.8	1.1	1.3	1	0	0	0
Tb927.11.13980	Outer row dynein-assembly protein 7 (ODA7)	ZUnknown	#N/A	#N/A	#N/A	#N/A	#N/A	#N/A	#N/A	#N/A	#N/A	#N/A	1	2	1.1	1.4	1	0	0	0
Tb927.6.3700	peptidyl-tRNA hydrolase PTH2, putative	ZUnknown	#N/A	#N/A	#N/A	#N/A	#N/A	#N/A	#N/A	#N/A	#N/A	#N/A	0.9	1.6	0.9	1	1	0	0	0
Tb927.6.1270	PITH domain-containing protein	ZUnknown	#N/A	#N/A	#N/A	#N/A	#N/A	#N/A	#N/A	#N/A	#N/A	#N/A	1	1.3	0.9	1.6	1	0	0	0
Tb927.10.14590	Protein of unknown function (DUF1279), putative	ZUnknown	#N/A	#N/A	#N/A	#N/A	#N/A	#N/A	#N/A	#N/A	#N/A	#N/A	1.1	1.6	1.1	1.4	1	0	0	0
Tb927.10.5740	Protein of unknown function (DUF778), putative	ZUnknown	#N/A	#N/A	#N/A	#N/A	#N/A	#N/A	#N/A	#N/A	#N/A	#N/A	1	1.7	1	1.2	1	0	0	0
Tb927.9.3850	Protein of unknown function (DUF788), putative	ZUnknown	#N/A	#N/A	#N/A	#N/A	#N/A	#N/A	#N/A	#N/A	#N/A	#N/A	1	1.5	1.1	1.3	1	0	0	0
Tb927.5.3290	Protein of unknown function, putative	ZUnknown	#N/A	#N/A	#N/A	#N/A	#N/A	#N/A	#N/A	#N/A	#N/A	#N/A	1	0.5	0.6	0.6	0	1	0	0
Tb927.1.4370	Putative integral membrane protein conserved region (DUF2404), putative	ZUnknown	#N/A	#N/A	#N/A	#N/A	#N/A	#N/A	#N/A	#N/A	#N/A	#N/A	1.1	1.7	1.1	1.2	1	0	0	0
Tb927.5.3590	Putative zinc finger motif, C2HC5-type/ASCH domain containing protein, putative	ZUnknown	#N/A	#N/A	#N/A	#N/A	#N/A	#N/A	#N/A	#N/A	#N/A	#N/A	1.6	1	1	1.2	1	0	0	0
Tb927.11.17010	Rab5-interacting protein (Rab5ip), putative	ZUnknown	#N/A	#N/A	#N/A	#N/A	#N/A	#N/A	#N/A	#N/A	#N/A	#N/A	0.8	1.4	0.9	1.7	1	0	0	0
Tb927.4.570	Replication factor-A C terminal domain containing protein, putative	ZUnknown	#N/A	#N/A	#N/A	#N/A	#N/A	#N/A	#N/A	#N/A	#N/A	#N/A	1	1.6	0.9	1.3	1	0	0	0
Tb927.5.920	rhodanese-like domain containing protein, putative	ZUnknown	#N/A	#N/A	#N/A	#N/A	#N/A	#N/A	#N/A	#N/A	#N/A	#N/A	1	0.8	0.7	0.5	0	1	0	0
Tb927.5.3740	RING-H2 zinc finger, putative	ZUnknown	#N/A	#N/A	#N/A	#N/A	#N/A	#N/A	#N/A	#N/A	#N/A	#N/A	1.5	1.4	0.9	1.2	1	0	0	0
Tb927.11.16240	RING-variant domain containing protein, putative	ZUnknown	#N/A	#N/A	#N/A	#N/A	#N/A	#N/A	#N/A	#N/A	#N/A	#N/A	1	1.6	1	1.2	1	0	0	0
Tb927.3.710	RING-variant domain containing protein, putative	ZUnknown	#N/A	#N/A	#N/A	#N/A	#N/A	#N/A	#N/A	#N/A	#N/A	#N/A	1	2.3	0.9	1.3	1	0	0	0
Tb927.5.1770	RNA pseudouridylate synthase, putative	ZUnknown	#N/A	#N/A	#N/A	#N/A	#N/A	#N/A	#N/A	#N/A	#N/A	#N/A	1	0.8	0.7	0.5	0	1	0	0
Tb927.11.16540	Roadblock/LC7 domain containing protein, putative	ZUnknown	#N/A	#N/A	#N/A	#N/A	#N/A	#N/A	#N/A	#N/A	#N/A	#N/A	1.1	1.6	1.1	1.1	1	0	0	0
Tb927.1.1220	RWD domain-containing protein	ZUnknown	#N/A	#N/A	#N/A	#N/A	#N/A	#N/A	#N/A	#N/A	#N/A	#N/A	0.9	1.6	0.8	1.1	1	0	0	0
Tb927.6.3970	SH3 domain protein, conserved	ZUnknown	#N/A	#N/A	#N/A	#N/A	#N/A	#N/A	#N/A	#N/A	#N/A	#N/A	1.1	1.5	1.1	1.3	1	0	0	0
Tb927.5.1930	signal peptidase subunit, putative	ZUnknown	#N/A	#N/A	#N/A	#N/A	#N/A	#N/A	#N/A	#N/A	#N/A	#N/A	1.1	1.6	0.7	1	1	0	0	0
Tb927.9.10350	Snf7, putative	ZUnknown	#N/A	#N/A	#N/A	#N/A	#N/A	#N/A	#N/A	#N/A	#N/A	#N/A	1.2	1.3	1.1	1.5	1	0	0	0
Tb927.10.2940	Soluble NSF attachment protein, SNAP, putative	ZUnknown	#N/A	#N/A	#N/A	#N/A	#N/A	#N/A	#N/A	#N/A	#N/A	#N/A	0.8	1.5	0.8	1	1	0	0	0
Tb927.9.13460	Spt4/RpoE2 zinc finger, putative	ZUnknown	#N/A	#N/A	#N/A	#N/A	#N/A	#N/A	#N/A	#N/A	#N/A	#N/A	1	2.3	1	1.4	1	0	0	0
Tb927.5.1260	Sulfate transporter N-terminal domain with GLY motif/Sulfate transporter family, putative	ZUnknown	#N/A	#N/A	#N/A	#N/A	#N/A	#N/A	#N/A	#N/A	#N/A	#N/A	1	0.9	0.6	0.5	0	1	0	0
Tb927.11.5810	Surfeit locus protein 6, putative	ZUnknown	#N/A	#N/A	#N/A	#N/A	#N/A	#N/A	#N/A	#N/A	#N/A	#N/A	0.8	2.1	0.9	1.1	1	0	0	0
Tb927.5.3790	Tetraspanin family, putative	ZUnknown	#N/A	#N/A	#N/A	#N/A	#N/A	#N/A	#N/A	#N/A	#N/A	#N/A	1.4	2.1	1	1.1	1	0	0	0
Tb927.7.330	Thioesterase-like superfamily, putative	ZUnknown	#N/A	#N/A	#N/A	#N/A	#N/A	#N/A	#N/A	#N/A	#N/A	#N/A	1	1.7	1.1	1.3	1	0	0	0
Tb927.7.5780	thioredoxin, putative	ZUnknown	#N/A	#N/A	#N/A	#N/A	#N/A	#N/A	#N/A	#N/A	#N/A	#N/A	1.1	1.7	1.1	1.4	1	0	0	0
Tb927.11.16440	Transmembrane protein 18, putative	ZUnknown	#N/A	#N/A	#N/A	#N/A	#N/A	#N/A	#N/A	#N/A	#N/A	#N/A	0.8	1.3	0.8	1.5	1	0	0	0
Tb927.11.9740	tRNA intron endonuclease, catalytic C-terminal domain containing protein, putative	ZUnknown	#N/A	#N/A	#N/A	#N/A	#N/A	#N/A	#N/A	#N/A	#N/A	#N/A	1	1.4	1	1.5	1	0	0	0
Tb927.7.180	Trypanosomal VSG domain containing protein, putative	ZUnknown	#N/A	#N/A	#N/A	#N/A	#N/A	#N/A	#N/A	#N/A	#N/A	#N/A	0.9	1.7	1	1.3	1	0	0	0
Tb927.11.9480	tubulin binding cofactor c, putative	ZUnknown	#N/A	#N/A	#N/A	#N/A	#N/A	#N/A	#N/A	#N/A	#N/A	#N/A	1	1.5	1	1.2	1	0	0	0
Tb927.7.3070	UAA transporter family, putative	ZUnknown	#N/A	#N/A	#N/A	#N/A	#N/A	#N/A	#N/A	#N/A	#N/A	#N/A	1	1.6	1	1.2	1	0	0	0
Tb927.2.2920	UAA transporter family, putative	ZUnknown	#N/A	#N/A	#N/A	#N/A	#N/A	#N/A	#N/A	#N/A	#N/A	#N/A	0.9	1.9	0.9	1.4	1	0	0	0
Tb927.4.1830	Urm1 (Ubiquitin related modifier), putative	ZUnknown	#N/A	#N/A	#N/A	#N/A	#N/A	#N/A	#N/A	#N/A	#N/A	#N/A	1	1.7	1.1	1.4	1	0	0	0
Tb927.5.4100	WD domain, G-beta repeat, putative	ZUnknown	#N/A	#N/A	#N/A	#N/A	#N/A	#N/A	#N/A	#N/A	#N/A	#N/A	1.6	1	1.1	0.8	1	0	0	0
Tb927.6.2860	WD domain, G-beta repeat, putative	ZUnknown	#N/A	#N/A	#N/A	#N/A	#N/A	#N/A	#N/A	#N/A	#N/A	#N/A	1	1.5	1	1	1	0	0	0
Tb927.8.3500	Dos2-interacting transcription regulator of RNA-Pol-II, putative	ZUnknown	#N/A	#N/A	missense_variant	#N/A	missense_variant	#N/A	#N/A	#N/A	#N/A	#N/A	0.9	0.7	0.9	0.9	0	0	0	1
Tb927.5.1320	hypothetical protein, conserved	ZUnknown	missense_variant	frameshift_variant	#N/A	#N/A	missense_variant	#N/A	#N/A	#N/A	#N/A	#N/A	1	1.3	0.6	0.8	0	0	0	1
Tb927.7.6640	hypothetical protein, conserved, no domains, no yeast or human match, NADP binding domain Rossmann Fold	ZUnknown	missense_variant	#N/A	#N/A	#N/A	missense_variant	#N/A	#N/A	#N/A	#N/A	#N/A	1.1	0.9	1.1	1	0	0	0	1
Tb927.7.4610	hypothetical protein, conserved	ZUnknown	missense_variant	#N/A	#N/A	#N/A	#N/A	#N/A	#N/A	#N/A	#N/A	#N/A	0.9	0.8	1	1	0	0	0	1
Tb927.10.2190	Protein of unknown function (DUF667), putative	ZUnknown	missense_variant	#N/A	missense_variant	#N/A	missense_variant	#N/A	#N/A	#N/A	#N/A	#N/A	0.9	1.5	1.1	0.9	1	0	0	1
Tb927.1.30	hypothetical protein	ZUnknown	missense_variant	#N/A	missense_variant	#N/A	#N/A	#N/A	#N/A	#N/A	#N/A	#N/A	2.9	1.3	1.1	1.3	1	0	0	1
Tb927.4.4950	hypothetical protein, conserved	ZUnknown	missense_variant	#N/A	missense_variant	#N/A	#N/A	#N/A	#N/A	#N/A	#N/A	#N/A	0.9	1.3	1	1.1	0	0	0	1
