# Supplementary material for: The trypanocidal benzoxaborole AN7973 inhibits trypanosome mRNA processing
Source: PLoS Pathog. 2018 Sep 25;14(9):e1007315. doi: 10.1371/journal.ppat.1007315 (PMC6173450; doi:10.1371/journal.ppat.1007315)
Supplement: S5 Table — For a detailed legend see the top sheet. (XLSX) [file ppat.1007315.s005.xlsx]

## Sheet: Legend
We treated the original and the partially resistant lines (see S1 tsxt) with 10xEC50 (S1 Table) for 5h and characterised the metabolomes. There were no differences between the cell lines that gave any clue to the resistance mechanism, and no changes after treatment that indicated inhibition of one particular pathway.
Each cell line was treated with AN7973 (10xEC50) (WTplusDrug, 80C5plusDrug and 80D4plusDrug). We report the relative amounts of metabolites compared to the corresponding non-treated cell lines (respectively, WTnoDrug, 80C5noDrug and 80D4noDrug). The metabolites are divided in groups, based on the fact that they changed in all, two or one of the cell lines. When a certain metabolite was not identi…

## Sheet: All cell lines
Mass	RT	FORMULA	Isomers	Putative metabolite	Confidence	Map	WT plusDrug	80C5 plusDrug	80D4 plusDrug
188.15	15.07	C9H20N2O2	2	N6,N6,N6-Trimethyl-L-lysine	8	Amino Acid Metabolism	4.18	3.34	5.79
188.12	9.51	C8H16N2O3	7	N6-Acetyl-L-lysine	8	Amino Acid Metabolism	2.27	2.96	2.77
204.11	11	C8H16N2O4	5	N6-Acetyl-N6-hydroxy-L-lysine	8	Amino Acid Metabolism	5.52	8.24	2.83
160.12	15.92	C7H16N2O2	6	N6-Methyl-L-lysine	8	Amino Acid Metabolism	2.31	2.76	2.89
177.06	9.17	C6H11NO5	1	4-Hydroxy-4-methylglutamate	8	Carbohydrate Metabolism	3.82	4.04	3.51
424.04	10.25	C12H18N4O7P2S	1	Thiamine diphosphate	8	Carbohydrate Metabolism	3.13	3.42	9.15
78.01	7.02	C2H6OS	3	Mercaptoethanol	7	Medium Component	15.72	8.88	40.93
187.12	9.23	C9H17NO3	3	8-Amino-7-oxononanoate	6	Metabolism of Cofactors and Vitamins	5.24	3.55	12.35
230.16	4.53	C11H22N2O3	2	Leu-Val	5	Peptide(di-)	3.04	5.25	4.34
237.16	13.66	C21H42N6O6	3	Ile-Lys-Lys-Ser	7	Peptide(tetra-)	2.93	2.76	3.71
259.15	7	C11H21N3O4	5	Leu-Ala-Gly	7	Peptide(tri-)	11.88	7.88	3.73
343.27	3.78	C19H37NO4	2	1,2-dioctanoyl-1-amino-2,3-propanediol	7	Unmapped	10.06	4.72	2.02
297.09	11.27	C11H15N5O3S	2	5'-methylthioformycin	5	Unmapped	2.91	2.56	4.36
174.1	9.82	C7H14N2O3	5	N5-Ethyl-L-glutamine	7	Unmapped	2.63	2.77	3.35
216.12	10.52	C8H16N4O3	2	N-acetyl-(L)-arginine	5	Unmapped	2.65	4.42	10.4
174.14	14.78	C8H18N2O2	1	Ne,Ne dimethyllysine	7	Unmapped	2.59	2.81	3
133.07	7.01	C5H11NO3	4	N-hydroxyvaline	5	Unmapped	3.54	3.11	3.82
173.11	9.06	C8H15NO3	5	Swainsonine	5	Unmapped	2.75	2.76	4.55
126.01	10.16	C2H7O4P	2	2-Hydroxyethylphosphonate	6	Amino Acid Metabolism	0.31	0.91	0.65
260.01	8.57	C6H13O7PS	2	S-Methyl-5-thio-D-ribose 1-phosphate	8	Amino Acid Metabolism	0.12	0	0.19
214.02	10.16	C5H11O7P	6	2-Deoxy-D-ribose 5-phosphate	6	Carbohydrate Metabolism	0.29	0.34	0.44
150.05	9.09	C5H10O5	37	D-Ribose	10	Carbohydrate Metabolism	0	0	0
230.02	10.31	C5H11O8P	16	D-Ribose 5-phosphate	10	Carbohydrate Metabolism	0.34	0.17	0.34
118.03	10.05	C4H6O4	7	Succinate	10	Carbohydrate Metabolism	0.35	0.32	0.44
745.09	10.66	C21H30N7O17P3	1	NADPH	6	Energy Metabolism	0.26	0.19	0.2
169.05	9.62	C4H12NO4P	1	Phosphodimethylethanolamine	8	Lipid Metabolism	0.35	0.37	0.44
215.06	10.69	C5H14NO6P	1	sn-glycero-3-Phosphoethanolamine	8	Lipid Metabolism	0.15	0.07	0.2
299.28	6.99	C18H37NO2	7	[FA (16:2)] N-hexadecyl-ethanolamine	6	Lipids: Fatty Acyls	0.35	0.39	0.22
676.55	4.09	C38H76O9	2	[FA (32:0/3:0)] 1-(O-alpha-D-glucopyranosyl)-(3R,29S,31R)-dotriacontanetriol	5	Lipids: Fatty Acyls	0.36	0.15	0.37
729.53	3.87	C40H76NO8P	14	[PC (14:0/18:2)] 1-tetradecanoyl-2-(9Z,12Z-octadecadienoyl)-sn-glycero-3-phosphocholine	5	Lipids: Glycerophospholipids	0.3	0.27	0.32
753.53	3.86	C42H76NO8P	25	[PC (14:0/20:4)] 1-tetradecanoyl-2-(5Z,8Z,11Z,14Z-eicosatetraenoyl)-sn-glycero-3-phosphocholine	5	Lipids: Glycerophospholipids	0.37	0.32	0.45
481.32	4.56	C23H48NO7P	8	[PC (15:0)] 1-pentadecanoyl-sn-glycero-3-phosphocholine	5	Lipids: Glycerophospholipids	0.48	0.46	0.43
755.55	3.86	C42H78NO8P	17	[PC (16:0/18:3)] 1-hexadecanoyl-2-(9Z,12Z,15Z-octadecatrienoyl)-sn-glycero-3-phosphocholine	5	Lipids: Glycerophospholipids	0.4	0.39	0.45
777.53	3.84	C44H76NO8P	20	[PC (18:3/18:3)] 1,2-di-(9Z,12Z,15Z-octadecatrienoyl)-sn-glycero-3-phosphocholine	5	Lipids: Glycerophospholipids	0.42	0.4	0.46
453.29	4.44	C21H44NO7P	5	[PE (16:0)] 1-hexadecanoyl-sn-glycero-3-phosphoethanolamine	5	Lipids: Glycerophospholipids	0.4	0.45	0.26
715.52	3.69	C39H74NO8P	11	[PE (16:0/18:2)] 1-hexadecanoyl-2-(9Z,12Z-octadecadienoyl)-sn-glycero-3-phosphoethanolamine	5	Lipids: Glycerophospholipids	0.49	0.39	0.4
479.3	4.31	C23H46NO7P	5	[PE (18:1)] 1-(9Z-octadecenoyl)-sn-glycero-3-phosphoethanolamine	5	Lipids: Glycerophospholipids	0.42	0.39	0.35
477.29	4.36	C23H44NO7P	2	LysoPE(0:0/18:2(9Z,12Z))	5	Lipids: Glycerophospholipids	0.46	0.41	0.37
525.29	4.21	C27H44NO7P	2	LysoPE(0:0/22:6(4Z,7Z,10Z,13Z,16Z,19Z))	5	Lipids: Glycerophospholipids	0.5	0.44	0.23
834.53	3.45	C43H79O13P	9	PI(16:0/18:2(9Z,12Z))	7	Lipids: Glycerophospholipids	0.48	0.45	0.5
382.13	4.88	C15H28O7P2	5	[PR] Farnesyl pyrophosphate	8	Lipids: Prenols	0	0.45	0.32
511.5	3.65	C32H65NO3	1	[SP (14:0)] N-(tetradecanoyl)-sphinganine	5	Lipids: Sphingolipids	0.03	0.04	0.21
539.53	3.59	C34H69NO3	1	[SP (16:0)] N-(hexadecanoyl)-sphinganine	7	Lipids: Sphingolipids	0	0.05	0.32
287.28	7.01	C17H37NO2	1	[SP (17:0)] heptadecasphinganine	5	Lipids: Sphingolipids	0	0	0
567.56	3.64	C36H73NO3	1	[SP (18:0)] N-(octadecanoyl)-sphinganine	5	Lipids: Sphingolipids	0	0	0.38
329.33	6.99	C20H43NO2	1	[SP dimethyl,amino(18:0/2:0)] 2S-dimethylaminooctadecane-1,3R-diol	5	Lipids: Sphingolipids	0.23	0.13	0.25
273.27	7.02	C16H35NO2	1	Hexadecasphinganine	5	Lipids: Sphingolipids	0.07	0.08	0.13
301.3	7	C18H39NO2	3	Sphinganine	7	Lipids: Sphingolipids	0.18	0.17	0.22
214.13	7.01	C10H18N2O3	2	Dethiobiotin	6	Metabolism of Cofactors and Vitamins	0.29	0.36	0.32
158.03	8.21	C5H6N2O4	3	(S)-Dihydroorotate	6	Nucleotide Metabolism	0.48	0.41	0.4
403.02	11.03	C9H15N3O11P2	1	CDP	8	Nucleotide Metabolism	0.44	0.06	0.19
363.06	10.77	C10H14N5O8P	5	GMP	10	Nucleotide Metabolism	0.45	0.21	0.17
151.05	9.93	C5H5N5O	3	Guanine	10	Nucleotide Metabolism	0.36	0.17	0.49
156.02	7.91	C5H4N2O4	2	Orotate	10	Nucleotide Metabolism	0.09	0.14	0.11
230.09	9.02	C9H14N2O5	1	Aspartyl-L-proline	5	Peptide(di-)	0	0.08	0.12
228.15	6.9	C11H20N2O3	3	Ile-Pro	5	Peptide(di-)	0.33	0.31	0.3
228.15	4.87	C11H20N2O3	3	Leu-Pro	5	Peptide(di-)	0.3	0.27	0.34
262.13	4.83	C14H18N2O3	4	Phe-Pro	5	Peptide(di-)	0.15	0.13	0.17
271.16	11.03	C11H21N5O3	1	Pro-Arg	5	Peptide(di-)	0.38	0.33	0.3
212.12	8.96	C10H16N2O3	2	Pro-Pro	7	Peptide(di-)	0.28	0.31	0.35
261.14	11.21	C9H19N5O4	1	Ser-Arg	5	Peptide(di-)	0.37	0.27	0.27
524.15	10.13	C21H28N6O6S2	2	Asn-Trp-Cys-Cys	5	Peptide(tetra-)	0.31	0.07	0.24
448.13	10.7	C16H24N4O9S	1	Asp-Asp-Cys-Pro	5	Peptide(tetra-)	0	0	0
458.25	7	C24H34N4O5	1	Phe-Val-Pro-Pro	5	Peptide(tetra-)	0.46	0.42	0.47
176.06	9.24	C12H24N4O4S2	1	Lys-Cys-Cys	7	Peptide(tri-)	0.15	0.18	0.42
392.14	8.02	C14H24N4O7S	7	Met-Asp-Gln	5	Peptide(tri-)	0.36	0.39	0.46
395.12	10.7	C14H25N3O6S2	1	Met-Met-Asp	5	Peptide(tri-)	0.15	0	0.07
301.16	7.22	C13H23N3O5	2	Val-Pro-Ser	7	Peptide(tri-)	0.28	0.22	0.39
301.16	5.25	C13H23N3O5	2	(Ac)2-L-Lys-D-Ala	7	Unmapped	0.28	0.17	0.41
832.51	3.44	C43H77O13P	1	1-16:0-2-18:3-phosphatidylinositol	5	Unmapped	0	0.08	0.34
856.51	3.41	C45H77O13P	1	1-18:2-2-18:3-phosphatidylinositol	7	Unmapped	0.08	0.18	0.35
246.05	8.95	C6H15O8P	3	Glycerophosphoglycerol	7	Unmapped	0.44	0.41	0.48
173.11	4.82	C8H15NO3	5	N-Acetyl-L-leucine	7	Unmapped	0.36	0.36	0.48
191.06	4.84	C7H13NO3S	1	N-Acetylmethionine	5	Unmapped	0.24	0.21	0.21

## Sheet: wild type and 80C5
Mass	RT	FORMULA	Isomers	Putative metabolite	Confidence	Map	WT plusDrug	80C5 plusDrug	80D4 plusDrug
326.32	3.45	C21H42O2	5	[FA (21:0)] heneicosanoic acid	5	Lipids: Fatty Acyls	19.05	3.94	ND
394.38	3.41	C26H50O2	4	[FA (26:0)] 9-hexacosenoic acid	5	Lipids: Fatty Acyls	3.38	3.13	ND
240.21	3.54	C15H28O2	5	[FA dimethyl(13:0)] 2,5-dimethyl-2E-tridecenoic acid	5	Lipids: Fatty Acyls	10.27	4.87	0.75
247.12	8.56	C9H17N3O5	3	Ala-Ala-Ser	7	Peptide(tri-)	3.01	3.41	0.47
191.1	10.49	C15H26N8O4	1	Ala-Arg-His	7	Peptide(tri-)	3.66	3.1	ND
166.06	4.73	C9H10O3	17	3-(3-Hydroxy-phenyl)-propanoic acid	8	Amino Acid Metabolism	0.49	0.35	0.59
182.06	7.29	C9H10O4	13	3-(4-Hydroxyphenyl)lactate	8	Amino Acid Metabolism	0.37	0.32	0.65
117.08	8.39	C5H11NO2	16	5-Aminopentanoate	8	Amino Acid Metabolism	0.49	0.48	0.55
117.04	8.05	C4H7NO3	5	L-2-Amino-3-oxobutanoic acid	8	Amino Acid Metabolism	0.47	0.47	0.75
198.08	9.09	C7H10N4O3	1	5-Acetylamino-6-amino-3-methyluracil	7	Biosynthesis of Secondary Metabolites	0.28	0	2.01
276.02	11.11	C6H13O10P	2	6-Phospho-D-gluconate	6	Carbohydrate Metabolism	0.46	0.36	0.63
179.08	8.93	C6H13NO5	10	D-Galactosamine	6	Carbohydrate Metabolism	0.42	0.42	0.54
167.98	11.17	C3H5O6P	3	Phosphoenolpyruvate	8	Carbohydrate Metabolism	0.44	0.32	0.59
155.03	10.08	C3H10NO4P	3	N-Methylethanolamine phosphate	6	Lipid Metabolism	0.39	0.44	0.83
467.3	4.65	C22H46NO7P	3	[PC (14:0)] 1-tetradecanoyl-sn-glycero-3-phosphocholine	5	Lipids: Glycerophospholipids	0.36	0.39	0.61
493.32	4.53	C24H48NO7P	3	[PC (16:1)] 1-(9Z-hexadecenoyl)-sn-glycero-3-phosphocholine	5	Lipids: Glycerophospholipids	0.45	0.41	0.63
743.55	3.83	C41H78NO8P	18	[PE (18:0/18:2)] 1-octadecanoyl-2-(9Z,12Z-octadecadienoyl)-sn-glycero-3-phosphoethanolamine	5	Lipids: Glycerophospholipids	0.48	0.47	0.53
783.51	3.43	C42H74NO10P	10	[PS (18:2/18:2)] 1,2-di-(9Z,12Z-octadecadienoyl)-sn-glycero-3-phosphoserine	7	Lipids: Glycerophospholipids	0.27	0.46	0.64
860.54	3.44	C45H81O13P	12	PI(16:0/20:3(5Z,8Z,11Z))	5	Lipids: Glycerophospholipids	0.46	0.47	0.6
469.25	3.98	C45H80O16P2	5	PIP(16:0/20:4(5Z,8Z,11Z,14Z))	7	Lipids: Glycerophospholipids	0.22	0	0.75
347.06	9.26	C10H14N5O7P	7	AMP	10	Nucleotide Metabolism	0.38	0.27	0.9
112.03	9.81	C4H4N2O2	2	Orotate(Fragment)	8	Nucleotide Metabolism	0.5	0.29	0.66
324.04	9.95	C9H13N2O9P	4	UMP	10	Nucleotide Metabolism	0.43	0.22	0.58
96.06	4.22	C6H8O	3	Cyclohex-2-enone	5	Unmapped	0	0	0.64
188.13	16.48	C7H16N4O2	5	Ngamma-Monomethyl-L-arginine	7	Unmapped	0.37	0.39	0.58

## Sheet: wild type and 80D4
Mass	RT	FORMULA	Isomers	Putative metabolite	Confidence	Map	WT plusDrug	80C5 plusDrug
297.09	7	C11H15N5O3S	2	5'-Methylthioadenosine	7	Amino Acid Metabolism	2.14	1.89
398.14	11.19	C15H22N6O5S	1	S-Adenosyl-L-methionine	8	Amino Acid Metabolism	2.48	1.74
354.35	3.43	C23H46O2	3	[FA (23:0)] tricosanoic acid	5	Lipids: Fatty Acyls	2.18	1.32
382.38	3.41	C25H50O2	2	[FA (25:0)] pentacosanoic acid	5	Lipids: Fatty Acyls	3.68	1.14
244.18	4.23	C12H24N2O3	4	Leucyl-leucine	7	Peptide(di-)	6.35	ND
333.17	11.24	C14H27N3O4S	4	Leu-Met-Ala	5	Peptide(tri-)	2.06	1.02
194.13	4.08	C12H18O2	1	4-Hexyloxyphenol	5	Unmapped	2.18	1.02
262.07	262.07	C16H10N2O2	1	indigo	7	Unmapped	3.95	0.31
183.1	7.7	C8H13N3O2	1	Nalpha,Nalpha-Dimethyl-L-histidine	7	Unmapped	3.42	1.13
142.04	9.13	C5H6N2O3	3	4-Imidazolone-5-acetate	6	Amino Acid Metabolism	0.36	0.64
713.5	3.41	C39H72NO8P	12	[PE (16:0/18:3)] 1-hexadecanoyl-2-(9Z,12Z,15Z-octadecatrienoyl)-sn-glycero-3-phosphoethanolamine	7	Lipids: Glycerophospholipids	0.5	0.55
172.08	8.83	C7H12N2O3	2	Glycylproline	5	Peptide(di-)	0.49	0.61

## Sheet: 80C5 and 80D4
Mass	RT	FORMULA	Isomers	Putative metabolite	Confidence	Map	WT plusDrug	80C5 plusDrug	80D4 plusDrug
246.13	11.37	C9H18N4O4	2	N2-(D-1-Carboxyethyl)-L-arginine	8	Amino Acid Metabolism	1.51	2.2	2.97
163.07	11.53	C6H13NO2S	6	S-Methyl-L-methionine	8	Amino acid Metabolism	1.56	7.05	2.4
535.4	4.19	C28H58NO6P	1	[PC (18:2)] 1-octadecyl-2-(1E-ethenyl)-sn-glycero-3-phosphocholine	5	Lipids: Glycerophospholipids	1.76	2.13	2.8
368.34	3.67	C27H44	1	[ST] (5Z,7E)-9,10-seco-5,7,10(19)-cholestatriene	5	Lipids: Sterol lipids	1.86	2.95	3.76
210.03	15.34	C6H11O6P	1	3-propylphosphoenolpyruvate	5	Unmapped	1.77	2.36	2.63
180.11	4.1	C11H16O2	2	3-tert-Butyl-5-methylcatechol	5	Unmapped	1.47	2.92	2.49
272.03	15.33	C7H13O9P	2	alpha-(2,6-anhydro-3-deoxy-D-arabino-heptulopyranosid)onate 7-phosphate	5	Unmapped	1.54	2.49	2.42
249.09	7.23	C10H19NO2S2	2	S-Acetyldihydrolipoamide	7	Unmapped	1.97	2.59	3.97
190.05	7.97	C7H10O6	4	[FA hydroxy,oxo(7:0/2:0)] 4-hydroxy-2-oxo-Heptanedioic acid	8	Amino Acid Metabolism	0.55	0.43	0.41
148.02	4.71	C5H8O3S	1	[FA oxo,methyl(4:0)] 2-oxo-4-methylthio-butanoic acid	6	Amino Acid Metabolism	0.53	0.46	0.49
145.04	8.04	C5H7NO4	2	2-Oxoglutaramate	8	Amino Acid Metabolism	0.51	0.47	0.46
175.02	8.19	C6H7O6	1	Monodehydroascorbate	6	Carbohydrate Metabolism	0.58	0.48	0.26
330.24	3.85	C18H34O5	10	[FA trihydroxy(18:1)] 9S,12S,13S-trihydroxy-10E-octadecenoic acid	7	Lipids: Fatty Acyls	0.51	0.44	0.34
547.36	4.3	C28H54NO7P	1	LysoPC(20:2(11Z,14Z))	7	Lipids: Glycerophospholipids	0.73	0.47	0.46
543.33	6.97	C28H50NO7P	3	LysoPC(20:4(8Z,11Z,14Z,17Z))	5	Lipids: Glycerophospholipids	0.71	0.4	0.44
203.13	11.24	C8H17N3O3	1	Lys-Gly	7	Peptide(di-)	0.53	0.23	0.23
100.02	4.71	C4H4O3	1	2-oxobut-3-enanoate	5	Unmapped	0.6	0.5	0.5
202.03	10.57	C11H6O4	2	Bergaptol	7	Unmapped	1.9	0.46	0.38

## Sheet: wild-type only
Mass	RT	FORMULA	Isomers	Putative metabolite	Confidence	Map	WT plusDrug	80C5 plusDrug	80D4 plusDrug
73.05	8.8	C3H7NO	6	Aminoacetone	8	Amino Acid Metabolism	2.02	1.65	1.87
161.11	9.74	C7H15NO3	2	L-Carnitine	10	Amino Acid Metabolism	2.12	1.75	0.61
284.2	3.63	C16H28O4	1	(10S)-Juvenile hormone III diol	5	Biosynthesis of Secondary Metabolites	3.48	0	ND
326.2	7.9	C20H26N2O2	4	Ajmaline	7	Biosynthesis of Secondary Metabolites	2.13	1.34	1.17
330.15	10.33	C19H22O5	4	Gibberellin A51-catabolite	7	Biosynthesis of Secondary Metabolites	2.92	1.41	0.91
126.1	4.16	C8H14O	6	Sulcatone	5	Biosynthesis of Secondary Metabolites	2.56	1.32	0.78
342.12	10.97	C12H22O11	42	Sucrose	10	Carbohydrate Metabolism	3.64	1.99	1.29
210.07	10.33	C7H14O7	4	Sedoheptulose	6	Energy Metabolism	2.28	0.76	1.31
312.3	3.47	C20H40O2	11	[FA (20:0)] eicosanoic acid	8	Lipids: Fatty Acyls	2.24	1.75	1.68
110.07	4.29	C7H10O	2	[FA (7:2)] 2,4-heptadienal	5	Lipids: Fatty Acyls	2.91	1.45	ND
258.22	3.55	C15H30O3	10	[FA hydroxy(15:0)] 2-hydroxy-pentadecanoic acid	5	Lipids: Fatty Acyls	2.13	0	ND
228.17	3.73	C13H24O3	4	[FA oxo(13:0)] 2-oxo-tridecanoic acid	5	Lipids: Fatty Acyls	3.23	0.35	1.23
242.19	3.66	C14H26O3	11	[FA oxo(14:0)] 3-oxo-tetradecanoic acid	5	Lipids: Fatty Acyls	4.54	1.24	0.46
439.31	4.54	C21H46NO6P	2	[PC methyl(12:2)] 1-dodecyl-2-methyl-sn-glycero-3-phosphocholine	7	Lipids: Glycerophospholipids	3.13	1.95	1.46
328.17	9.49	C20H24O4	4	Crocetin	5	Lipids: Prenols	2.12	1.05	0.45
276.1	10.64	C10H16N2O7	2	GammaGlutamylglutamicacid	7	Peptide	2	1.98	62.44
294.16	4.85	C15H22N2O4	2	Leu-Tyr	5	Peptide(di-)	3.84	1.74	1.65
266.13	4.8	C13H18N2O4	1	Phe-Thr	5	Peptide(di-)	2.13	1.51	1.76
358.14	9.91	C20H22O6	13	(+)-pinoresinol	5	Unmapped	2.21	0.86	ND
294.18	3.6	C17H26O4	3	[6]-Gingerol	7	Unmapped	6.44	1.32	0.96
214.19	3.64	C13H26O2	15	CAI-1	5	Unmapped	2.16	1.53	1.54
321.1	8.2	C11H19N3O6S	4	gamma-L-Glutamyl-L-cysteinyl-beta-alanine	7	Unmapped	5.57	ND	ND
360.04	11.1	C10H18NO9S2	1	Glucoputranjivin	5	Unmapped	5.62	ND	ND
223.11	9.78	C8H17NO6	1	N-acetyl -D- glucosaminitol	7	Unmapped	2.33	1.47	0.51
216.11	8.37	C9H16N2O4	3	gamma-Glutamyl-gamma-aminobutyraldehyde	8	Amino Acid Metabolism	0.44	0.51	0.6
192.06	8.9	C7H12O6	6	Quinate	8	Amino Acid Metabolism	0.46	0.93	0.74
202.1	9.06	C8H14N2O4	5	Proclavaminic acid	7	Biosynthesis of Secondary Metabolites	0.43	0.66	0.63
134.02	10.8	C4H6O5	4	(S)-Malate	10	Carbohydrate Metabolism	0.48	0.52	0.53
665.12	9.04	C21H29N7O14P2	1	NADH	8	Energy Metabolism	0.46	0.61	0.91
184.15	3.99	C11H20O2	17	[FA (11:1)] 10-undecenoic acid	5	Lipids: Fatty Acyls	0	0	0.76
226.12	4.16	C12H18O4	4	[FA oxo,hydroxy(5:1/5:0)] (1S,2R)-3-oxo-2-(5'-hydroxy-2'Z-pentenyl)-cyclopentaneacetic acid	5	Lipids: Fatty Acyls	0.4	0	30.52
172.11	4.52	C9H16O3	12	9-Oxononanoic acid	5	Lipids: Fatty Acyls	0.45	0.95	1.48
241.13	4.89	C12H19NO4	2	N-(3-Oxooctanoyl)homoserine lactone	7	Lipids: Fatty Acyls	0.42	1.05	0.99
689.5	3.36	C37H72NO8P	11	PC(14:1(9Z)/15:0)	5	Lipids: Glycerophospholipids	0.5	0.52	0.57
457.25	7	C43H80O16P2	8	PIP(16:0/18:2(9Z,12Z))	7	Lipids: Glycerophospholipids	0.36	0.52	0.62
113.94	13.55	H2O3S2	1	H2S2O3	7	Unmapped	0.08	1.2	1.17
89.08	14.57	C4H11NO	1	N-dimethylethanolamine	7	Unmapped	0.5	0.79	1.08
